# Supplementary material for: Effects of high spatial and temporal resolution Earth observations on simulated hydrometeorological variables in a cropland (southwestern France)
Source: Copernicus journal article supplement (doi:10.5194/hess-21-5693-2017), 2017-11-16
Supplement: Supplementary file 1 [file hess-21-5693-2017-supplement.zip]

Archive with 4 entries (4 files):
- hess-21-5693-2017-supplement-title-page.pdf
- OPTIONS.nam_FMST_2006
- OPTIONS.nam_REF_2006
- README.md
