# Supplementary material for: Effects of high spatial and temporal resolution Earth observations on simulated hydrometeorological variables in a cropland (southwestern France)
Source: Copernicus journal article supplement (doi:10.5194/hess-21-5693-2017), 2017-11-16
Supplement: Supplementary file 1 [file hess-21-5693-2017-supplement.zip › hess-21-5693-2017-supplement-title-page.pdf]

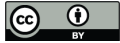

## *Supplement of*

# **Effects of high spatial and temporal resolution Earth observations on simulated hydrometeorological variables in a cropland (southwestern France)**

**Jordi Etchanchu et al.**

*Correspondence to:* Jordi Etchanchu ([jordi.etchanchu@cesbio.cnes.fr](mailto:jordi.etchanchu@cesbio.cnes.fr))

- [hess-21-5693-2017-supplement-title-page.pdf](#)
- [OPTIONS.nam\\_FMST\\_2006](#)
- [OPTIONS.nam\\_REF\\_2006](#)
- [README.md](#)

The copyright of individual parts of the supplement might differ from the CC BY 3.0 License.
