# Supplementary material for: Effects of high spatial and temporal resolution Earth observations on simulated hydrometeorological variables in a cropland (southwestern France)
Source: Copernicus journal article supplement (doi:10.5194/hess-21-5693-2017), 2017-11-16
Supplement: Supplementary file 1 [file hess-21-5693-2017-supplement.zip › OPTIONS.nam_FMST_2006]

&NAM_PGD_GRID
   CGRID = 'IGN ',
/
&NAM_IGN
   CLAMBERT = 'L93',
   NPOINTS = 12261,
   XX =  544843.0605210,  544956.7940930,  545891.4330740,  545949.5244900,  545519.0852480,  545361.8549740,  545143.6084540,  545507.1955340,  544937.1426020,  544592.4765520,  544945.4875670,  545908.4172640,  545980.9911560,  545437.1520050,  544956.4638270,  547873.3461170,  546647.0386320,  547944.8309000,  547018.1370640,  545774.2748760,  544683.2663200,  547994.6573040,  546433.9516500,  547446.7389570,  544663.7809000,  544814.5868700,  545248.9516320,  547313.2205360,  546184.4166620,  548109.2613160,  545673.0238020,  545753.4689730,  548974.9177420,  547961.9713760,  549416.4537970,  545905.1286320,  544545.2293010,  548582.4475670,  548355.5337960,  548372.7754950,  548526.8170450,  549214.6672350,  548592.5809000,  549258.2051420,  544702.4457280,  549653.3193620,  548677.6567620,  549926.8920110,  546666.6674980,  546510.0031220,  544490.4978810,  546559.6159520,  549331.8669220,  545393.6906000,  548838.2392330,  549493.4458400,  546231.8935760,  549205.4279590,  545352.2694500,  546023.7809000,  546958.7282680,  549313.3015610,  550199.6142330,  548894.3916780,  546021.1803170,  550088.5889810,  549089.5560480,  547019.1063160,  547019.7809000,  545760.8893340,  547473.2148620,  548560.6084860,  547685.5322230,  549911.3685290,  550240.3142330,  545420.4185810,  545005.3727370,  549728.4973180,  549036.6393470,  548811.6280340,  547644.9639990,  549584.1165010,  550440.1306270,  549421.3319200,  550328.7548130,  550541.7809000,  544939.0462060,  546603.5837990,  548688.0966890,  544769.5263550,  545575.9099320,  546261.4575470,  549747.2094710,  550865.0440580,  545293.0934000,  547907.9589420,  550752.3734930,  550610.0570510,  545390.1612680,  548744.2636590,  550973.0527890,  549772.4209000,  547137.7389420,  544642.4475670,  545277.8055910,  548012.7464170,  549687.0725670,  547553.2229060,  545722.8134140,  545558.4584070,  551020.3830510,  548836.7399640,  550915.7809000,  551341.6756370,  548054.4574510,  547366.9044430,  549389.1242960,  546413.3241100,  547060.9844950,  550273.2969190,  547876.1554320,  545420.4006180,  545253.3162540,  547486.4575920,  547667.3523290,  549543.4437850,  548042.7404380,  547449.9475670,  550569.0309000,  550902.6380430,  547320.5428050,  548141.1670390,  547044.7482200,  545962.8547590,  547422.6526950,  551208.8438370,  549985.4863260,  550584.2757450,  545543.5402980,  544540.4475670,  544638.4570230,  544861.1142330,  551772.7809000,  550739.4919530,  549788.9986260,  547705.9128800,  548998.2082500,  547874.2727030,  551292.0629510,  547323.6089800,  551924.3118730,  547772.2051420,  549911.5655150,  547047.0811920,  549572.2420530,  547832.4339610,  546106.5871830,  546197.2294050,  551419.3376420,  546345.1686550,  547456.3962850,  546237.9573710,  548392.5757660,  545922.0129440,  549830.3263550,  551272.0194690,  551202.0450510,  548525.8415060,  548851.3797860,  544962.8867820,  549213.4820490,  549595.8817400,  549770.4863550,  547306.1770350,  547140.5384220,  549451.5121250,  547508.6750180,  545359.4917430,  548724.7149990,  544756.7374220,  548797.9401920,  552746.7220760,  549193.0253440,  551808.4928830,  549915.3276980,  546807.6429690,  548361.4858180,  551674.5309000,  549422.0666140,  549544.9237570,  544617.5486900,  549525.6809000,  551502.7456060,  544136.7861360,  553125.1479300,  552950.5875300,  548494.0100670,  552100.8840490,  545152.6390310,  549169.9533770,  549630.4759350,  547663.6910120,  548660.8668480,  545293.9769780,  548770.5150770,  549283.1873520,  549318.2253440,  551375.1048440,  548019.6791640,  545906.3615450,  544381.1142330,  550453.4346340,  545262.3981840,  548115.7174080,  549999.0278400,  549606.8397240,  552524.0816180,  548539.8985470,  545529.5538730,  550335.0987290,  546908.1468310,  544500.3235480,  552370.1415560,  547409.4951860,  550617.4247360,  544714.0134580,  544721.4880130,  552931.8536270,  547301.7054280,  552573.1655150,  550095.6856620,  550693.3193620,  552776.6171370,  547004.2292520,  553136.0417700,  550959.3627180,  549985.8028780,  550609.8997120,  553054.1314150,  544368.6697890,  548245.6466240,  544155.0047810,  549477.3193620,  549283.7196940,  546345.3611470,  550246.9387950,  553425.6701680,  553985.6014130,  549073.9430620,  551824.2402300,  553317.8498660,  544189.6391680,  544980.0496220,  554168.2087070,  549716.1111750,  551655.2117640,  553191.7809000,  544498.7931250,  544929.1142330,  548387.0133200,  547242.2078140,  548914.6319640,  548857.4778700,  550133.0773820,  552913.5789460,  553763.1547020,  553228.3241100,  547556.5428050,  551974.2603820,  554126.8718090,  547707.6897670,  551387.9237570,  551180.7538730,  552233.5332810,  554656.9237570,  551040.3245890,  550416.4988490,  549275.5041700,  552524.6436450,  552399.4095920,  547168.7092280,  552639.5544850,  547271.6703010,  550949.2466530,  547696.4765520,  544067.4997210,  549267.3190260,  552699.2738580,  549841.5960260,  551914.2201320,  549840.9237570,  554085.9627180,  554246.2636590,  554299.6823780,  552187.9046110,  554631.2354450,  549590.9518840,  549117.7809000,  552780.7098620,  545630.4539460,  549238.7776850,  553186.6729190,  555049.4732080,  552216.2809000,  552470.6196100,  546956.5884120,  549034.8009800,  554350.8681480,  552655.9713760,  547068.8150460,  547315.7809000,  544738.6647130,  544247.3775390,  552108.8789390,  549177.6209000,  553606.0031220,  554579.9586780,  550933.1762490,  549593.2754050,  553900.0291760,  555151.8941080,  547999.3009000,  545473.0116690,  552070.9645730,  552371.9809000,  554048.6641810,  554049.3151470,  546454.1809000,  544881.8274120,  548074.1287260,  548167.0189950,  552666.7912090,  551815.7981040,  543946.6275260,  550917.2666140,  545142.1034810,  554699.4352210,  554453.9380320,  552499.7809000,  547546.6449000,  548970.3340910,  549887.5814870,  548284.5631710,  549983.9809000,  546785.8757450,  547013.2046290,  555017.1787490,  548140.8718090,  554188.9091050,  545055.1655150,  545193.0690360,  550645.8262070,  554710.7763340,  551597.5630780,  555123.9383800,  545258.0031220,  547184.3118730,  547289.6616950,  549092.2937210,  555210.6980270,  546785.4651110,  553979.0829640,  553084.6686970,  548027.6627570,  550478.9589820,  545741.1142330,  550622.4905770,  552890.5300410,  554769.3809000,  547779.2718090,  550738.0666140,  547341.8961880,  555594.0174590,  555983.3566580,  550585.9347460,  552854.8247840,  548342.2855730,  553347.0851040,  553712.4901200,  547231.1838850,  551123.1747250,  546542.9044960,  553561.6993180,  555309.8823490,  548886.5108270,  554661.4802460,  555195.3887430,  546134.1938180,  545523.3452560,  554416.4831900,  545397.2209000,  547138.4905770,  550579.5904240,  556199.7809000,  544507.9010720,  549338.0937710,  554444.4541670,  555709.6345590,  555474.3840750,  550135.0176490,  549100.1155610,  544629.0343930,  546159.5646840,  547627.8834640,  547962.7314380,  550544.8789390,  552194.1275670,  555752.0309000,  548343.8471980,  549209.9055610,  555790.1809000,  551275.2753070,  548635.9091130,  544439.5809000,  550662.4128700,  546747.4475670,  548200.3887030,  549974.0578230,  555390.6079680,  546441.9744480,  556025.4059000,  549528.9009000,  555024.1421900,  556199.0067060,  549318.1056860,  552634.0666140,  547964.0107850,  549108.9407920,  549425.7202940,  550491.5211600,  548032.6319640,  551213.0622850,  554195.9198960,  555701.8640570,  544568.3167850,  553685.3047100,  554055.2614190,  556411.3923290,  544769.5350530,  548389.0257980,  546964.1142330,  548197.4342330,  554851.4035420,  549241.3292870,  550319.1787490,  544294.7533770,  553313.4181090,  554780.3150610,  545105.7809000,  546268.0309000,  555040.5237570,  556545.2197490,  552177.0491930,  545991.5077940,  549626.1230050,  550710.2979730,  557065.2502880,  555100.6142330,  547401.9554790,  551006.5119340,  549690.2112800,  553574.0554100,  544608.3326240,  550878.7015350,  556821.8082970,  552564.7039770,  552272.9486020,  556970.5468570,  548113.5837170,  549183.7809000,  549474.8354450,  552703.4755560,  552198.2994190,  550926.4616610,  556348.5468570,  551534.7176090,  552896.3578230,  551135.1609000,  546116.4320630,  544428.6125830,  548060.7505970,  546685.4234120,  551616.0236590,  549586.8605460,  551792.1780390,  554483.4964900,  548258.2110550,  551366.8694050,  551720.2316040,  557220.2100850,  546589.7527310,  552723.8942890,  550533.4651110,  544891.0595890,  550257.8424380,  555333.8036510,  557337.4080190,  548660.7152070,  551784.2019530,  549671.4059000,  552152.3716960,  554067.1748390,  550420.2721280,  551952.5972270,  554968.7386460,  552332.5894110,  552713.4512300,  556363.1076330,  548171.7275670,  544564.3523290,  549893.0491930,  548818.0757570,  549226.3629690,  555773.2046290,  548735.3852960,  554903.9621190,  555288.0744780,  550752.9349340,  553983.4475670,  557605.0832260,  555272.8656460,  557373.7142330,  552033.8359460,  552624.4826540,  554188.3523290,  555879.5400970,  549866.7523290,  550697.0116690,  548508.6044290,  547983.1266250,  549292.4742330,  546867.2632530,  547566.8098020,  547792.0062520,  552141.7809000,  548027.3725470,  550823.5009000,  553106.8176350,  554552.1547320,  557600.8278800,  546473.2239820,  557300.2832260,  552600.2019530,  553158.8567120,  554598.7552590,  553107.6240740,  554499.4639190,  549371.0401590,  554438.3409000,  546023.3849850,  547077.2753160,  551020.1795710,  555490.9314790,  550956.6651110,  550904.1110590,  551593.5854110,  549759.0680290,  544830.8231540,  548407.2025870,  550043.5255810,  550633.7431640,  554506.8951860,  556961.0898990,  548011.9655150,  548354.0134580,  549264.1743430,  554225.5039770,  548499.0536270,  549265.9252300,  556935.0595890,  549090.9149210,  550841.0358020,  553173.4394370,  556310.3450030,  543786.1338410,  550532.5064810,  553783.9684000,  552192.5216410,  547475.9347460,  552079.9181550,  554168.4260610,  554823.8310570,  555695.7012980,  545545.9977670,  549970.5146340,  556149.0874330,  544396.3523290,  549809.5200300,  557116.6589490,  549472.7809000,  551592.6175010,  551615.4172640,  552359.9290480,  553870.4287870,  554069.4025220,  554653.6221700,  556873.2881460,  551818.2122730,  548507.9435020,  547385.4843220,  556825.8741640,  553033.7481130,  549318.6123610,  553699.7809000,  557643.0367140,  549173.5757720,  544497.7009000,  549498.2051420,  556261.7809000,  556471.9085600,  548014.2103480,  558046.5583800,  554380.8841360,  550291.3364560,  547716.2446780,  550785.5786530,  554255.2354450,  550667.7391460,  551567.4428720,  553930.0060660,  545194.7997680,  543768.7594930,  549289.2354450,  557127.2025870,  554647.4960340,  552621.3153600,  550677.6187380,  543867.2989720,  557824.3041230,  556144.8035720,  545587.6817090,  553565.6069870,  553646.8364560,  543939.4671750,  549234.6774520,  558663.4537620,  550463.6181190,  552659.4340790,  554029.3912900,  554085.5990820,  554817.4442660,  557440.4430920,  550768.2609000,  553947.7063660,  544400.3340370,  556419.8739230,  553001.7400840,  557873.6018720,  557294.6101680,  557622.4674670,  558277.0206660,  543792.0209000,  556990.3047100,  548226.6737570,  546686.9265310,  544055.8985470,  552832.9066670,  554633.6439140,  548868.2514880,  559013.1142330,  557560.3523290,  543892.3668870,  552417.2222540,  553278.8258550,  559049.7809000,  549598.2681970,  549846.4349970,  545926.6093520,  546249.0120090,  550633.3320670,  557695.7458120,  555795.2678820,  553689.9409000,  556918.0031220,  555561.5309000,  557803.0912450,  553041.1809000,  559111.9078840,  550749.3263550,  550859.1045710,  549165.4219260,  554374.7449290,  545373.1142330,  558739.7512700,  558389.7668700,  550983.7809000,  550047.6770880,  557060.8021770,  558222.1307350,  547732.2121270,  557837.2301750,  549144.4189370,  550291.3856700,  557177.3441180,  548501.7999480,  553894.1614160,  552310.1338410,  554467.6501810,  548590.7362260,  552249.0558000,  557099.2973840,  550163.3999480,  559770.0666140,  554388.7679130,  553734.3505470,  543977.7239740,  553913.7470020,  547999.2484180,  559404.9075150,  553489.3997610,  550608.8555270,  555863.6957940,  558057.1820300,  558855.3379930,  551940.2464170,  554441.4651110,  559000.2469190,  559845.1834970,  549678.2838240,  554154.2410370,  554123.8660060,  549612.0955070,  555768.6797760,  548453.8761380,  549170.8475670,  543538.3777590,  558581.3047100,  549104.5216410,  557916.8910320,  552129.2006950,  553015.8660060,  555137.5330610,  558839.8890080,  549465.1602100,  557930.1668650,  560074.6541390,  551487.8161550,  558002.7688520,  555802.0565180,  551140.4988490,  559423.4330740,  551099.8406010,  554364.4279590,  550916.8074490,  551448.9255880,  554344.7672010,  555214.6887260,  557931.6783360,  560349.7202940,  548389.1142330,  548128.4859690,  552772.8395700,  551244.5687790,  544339.9265580,  549894.9974900,  555614.0756070,  556002.5642000,  544162.9764920,  553306.3804620,  553649.5997280,  549710.8385690,  560158.8837040,  552529.7400840,  557978.4588660,  554387.2222410,  560260.0475670,  552793.8206350,  556446.0268890,  554827.6223100,  550104.0374600,  555165.6454420,  550269.2209000,  544677.7809000,  553992.1559000,  555025.5754950,  558487.3148810,  548154.7707990,  556807.3445360,  556868.7395780,  544275.3764060,  560070.7707170,  555019.2161940,  552778.8402410,  557253.1142330,  553510.0666140,  553901.3221840,  553982.0867820,  549800.9387950,  556166.2521040,  558246.3754950,  559844.9106710,  554957.7811510,  554186.5662610,  556230.5754210,  558335.9840250,  560267.3865340,  551874.9809000,  558426.7220760,  549654.1257280,  551905.2960990,  556304.2909440,  560521.3797200,  553441.9664670,  556481.4651110,  558336.9690190,  560766.6559000,  543867.2733730,  549679.1117730,  554721.0141020,  560019.3193620,  548922.8688710,  551905.8779870,  554355.4565760,  550960.7184000,  555277.2209000,  545693.1142330,  551257.9033490,  555967.6896800,  558041.1467540,  555045.9518400,  560377.9272410,  557194.5445360,  554004.5387950,  556225.0180130,  556992.3582200,  548839.5001980,  549079.3842060,  549453.6756370,  544960.9723890,  547828.2460160,  555368.0739970,  558186.3691350,  556577.3788040,  544904.3523290,  546475.0901370,  555707.9627180,  560168.7604920,  550106.7851190,  548773.5358740,  553107.2635960,  553664.0475670,  561451.3452560,  555705.4822960,  557999.9760220,  558423.0021390,  550449.3461170,  561010.8183060,  561265.1798070,  554430.2271810,  554940.2761380,  545874.3655150,  551203.7024690,  558166.4984570,  551953.5740030,  555832.6380430,  557290.4885920,  548482.2313500,  552273.8126460,  550105.1643590,  548471.2563100,  552209.8433330,  554034.9387950,  554117.0982650,  552573.3199070,  556499.8372380,  548752.7633560,  550130.9028510,  556911.3827100,  544220.8575150,  551124.1555220,  552833.6931810,  544075.0951860,  557480.7555190,  543486.2110410,  551955.6914430,  550018.1809000,  548183.1965080,  547912.2323110,  555917.8712230,  552220.9142330,  554559.0536270,  556395.8593310,  554201.0935930,  558165.9744480,  546187.2094710,  551472.9270560,  553549.9784510,  553627.3218840,  553274.1193620,  553886.9415220,  556279.3193620,  545612.2721280,  544446.8102740,  554821.4795300,  543740.4749640,  545679.7809000,  552768.2094710,  550970.2876990,  547996.5120830,  551372.0771960,  551037.2428670,  553823.6380430,  544552.9557250,  554307.3878990,  557616.5492620,  560008.1711440,  553938.2313500,  562309.4838700,  557991.5490160,  548499.0089700,  553218.3691350,  549875.3529930,  553526.6287260,  548210.1092580,  551710.5969440,  554829.6697890,  561037.7445360,  561458.4362190,  552909.4179110,  551281.1894780,  548955.0607130,  554570.5063900,  544487.1655150,  552562.1257280,  552124.5981040,  548384.6561140,  552790.3754950,  552899.9860280,  553393.1487760,  549108.2830710,  554095.4616980,  551995.1997030,  552614.2466530,  558087.1534490,  554770.0802010,  555597.2094710,  548285.3495270,  547692.3364560,  558031.2647710,  546786.3264430,  557886.7552590,  553254.2099910,  555460.5115500,  549051.1357390,  554191.2521640,  555702.0484160,  549912.6181090,  550783.2246630,  553331.6429690,  555366.0417700,  553159.8781850,  552580.0885920,  553026.6488250,  555049.0574960,  543711.5142330,  552424.9801600,  553637.0511370,  557271.6106870,  543732.6407130,  549006.3496380,  546302.6253440,  546010.7984440,  552693.7440000,  550128.3786010,  550689.2578230,  545338.1158280,  552646.4330740,  555985.7248250,  562212.6102740,  548713.9664670,  551533.9085600,  546329.0116690,  550579.3009000,  557679.9713760,  554435.7859700,  554607.6240370,  554729.8736150,  558207.2194960,  559749.9837990,  548039.8368440,  561398.4249680,  545395.3917950,  543991.9099320,  554345.2354450,  546373.2881460,  552638.5110590,  559887.6752890,  554534.3974410,  555245.8867150,  552729.5586780,  551878.7523290,  543246.6481570,  551597.1142330,  554424.6627900,  551673.5768180,  543743.2007470,  552425.2027750,  549045.1789580,  552760.6491170,  553403.7332810,  546934.1482470,  543920.5895020,  543830.4765520,  554451.7809000,  557501.6899910,  562408.8402340,  543376.2361850,  560892.7877030,  543207.0116690,  552460.6629510,  563081.2911040,  547103.4933740,  553019.8899510,  554679.5282680,  558095.6313670,  552010.7909460,  558017.4163340,  545952.4083510,  554605.0282120,  555597.6156980,  550007.2661290,  553610.9575900,  543803.1241840,  546616.5641170,  546793.2354450,  557655.5873520,  543468.9032730,  546339.6542400,  560804.9660850,  561664.2053900,  545120.7615450,  550586.4450310,  559545.5640330,  545092.0475670,  553525.1142330,  555176.1227800,  551444.6841260,  557488.8595520,  553784.7809000,  551545.4882170,  554280.9884470,  552277.1142330,  561834.6685190,  545000.4401470,  545524.0939430,  561411.6977830,  546703.4784950,  547204.3776950,  543949.8262750,  545631.8755550,  546223.8205040,  551051.4861630,  550027.5214410,  546091.3193620,  560688.4798550,  561758.6809000,  552201.0222790,  545633.4867820,  545789.6899910,  552346.0849000,  552823.9067430,  553600.0925880,  553272.0966890,  552925.5859540,  548177.9142330,  554395.9959540,  554532.3553130,  553472.3825710,  547924.3453170,  550578.8614130,  556222.3115120,  543753.9569000,  553706.1705100,  559986.6861630,  561342.3545430,  546013.7579110,  547360.9484680,  552453.4427360,  562243.8910450,  545781.1926650,  551087.7184000,  551617.4896380,  553826.0104080,  545734.4287870,  552152.6380430,  559861.2809000,  548230.0966890,  554546.7809000,  556034.7260700,  554030.0331850,  554318.9561580,  545889.3764060,  550040.3288450,  554821.2309770,  559923.6240370,  551799.4086150,  556384.6760050,  545414.8127470,  553483.1270540,  543800.6279590,  545998.2994190,  547913.1926650,  553040.8877620,  553325.8985470,  553108.5644050,  561131.5604280,  550740.2399160,  554347.8890080,  546472.4946550,  557705.0457220,  544000.0389650,  544076.4285190,  547438.6609000,  551433.6296390,  549830.0327520,  554169.9077880,  556722.7852670,  547858.4200750,  548073.0806710,  553748.9649000,  543774.0966890,  548157.3565420,  546120.3691350,  546241.4697890,  553245.4438210,  559765.2002550,  561473.8483160,  545105.9127050,  545247.8313730,  545783.1691350,  546303.7617150,  551190.0632530,  554100.2354450,  546530.8397240,  550911.5666140,  543331.5658460,  561595.0309000,  544759.3542330,  545667.4016950,  552829.8489270,  553871.1176880,  546091.5018300,  554589.7296180,  552694.6380430,  553609.5748390,  557547.2094710,  546643.8325130,  550073.2878250,  551324.9066490,  554716.4260610,  544689.0222790,  551542.9835580,  559489.2412170,  561206.3210460,  554030.6663490,  553488.3142330,  554431.8868600,  545890.7242960,  546560.3582200,  553927.7809000,  564917.0514880,  545975.0282870,  545440.6684650,  544520.1115880,  562014.9256140,  547201.1181430,  543764.7098100,  556423.4239450,  557711.9849820,  561862.0146660,  547706.4559000,  557468.5250860,  561501.0690360,  544108.5340380,  543546.0523290,  553101.4951860,  556181.8498660,  544934.2925280,  545661.9347460,  544353.4995900,  546250.5132080,  561121.8985470,  561350.3111330,  549829.9809000,  559679.6495040,  560928.4942760,  561031.8114340,  561706.6742090,  561611.5291520,  552349.4951860,  560811.6493620,  545259.4380430,  552505.0865990,  561781.3920110,  550221.6452330,  551349.8498660,  559567.8723290,  555059.8720790,  544941.1926650,  550438.4613120,  561790.6065880,  546717.0574960,  561133.3434000,  547541.3959940,  554682.7670750,  557108.8809000,  548859.4440580,  549727.3341990,  552993.5527120,  550027.4494080,  552691.6475670,  544338.0209000,  549624.1943690,  557375.4951860,  561684.3337460,  552625.8145770,  553547.2591610,  553060.2253440,  561037.3682020,  554065.5795580,  545420.0031220,  545786.0554100,  560870.9881070,  557684.6156830,  550506.4905770,  548829.0161940,  552806.3881870,  565383.7809000,  560947.7809000,  552515.5384760,  553034.3691350,  553690.7768900,  545595.0272770,  565499.0852480,  543968.7505970,  550811.6727920,  560553.2474130,  562027.7037650,  545127.3137470,  556952.1287260,  557531.4823930,  556615.0189950,  565396.5550940,  554642.2500360,  554944.1391090,  562620.7928710,  548635.9809000,  550639.4368140,  550700.4698950,  560746.3014480,  556403.9900500,  549813.9776210,  557220.4164140,  557670.1995050,  546214.7170700,  554460.2460160,  560774.0747390,  560979.5211600,  565370.5043040,  562145.8024050,  545260.5356170,  545316.7552590,  553979.1822020,  553966.0031220,  548814.3840750,  557854.8752400,  546911.5821210,  548947.8660060,  545157.1471550,  544364.3081730,  554171.3207230,  556367.4951860,  544050.8720420,  546325.0268020,  548729.8549740,  549424.3263550,  554375.9552080,  556687.1771260,  546252.4320630,  553099.8880430,  561163.3792940,  552186.6123610,  548827.1493210,  549604.5216410,  561432.2272520,  565013.5200300,  557351.7809000,  546753.3689150,  555813.4501910,  565497.6169660,  561663.6453070,  565986.4796950,  550167.0536270,  544221.9948530,  551979.5399360,  553839.6770040,  561062.6580930,  546852.9809000,  557445.6209000,  545418.0031220,  547285.9418200,  549216.1859630,  554933.2309000,  555923.6666140,  560060.7332810,  546416.7353900,  559418.8906180,  564185.2598920,  565473.4809000,  547647.4790130,  548228.2609000,  545302.2387310,  546080.6660060,  543114.7043300,  545929.7416840,  560339.8151300,  544304.3720330,  544468.0750180,  545810.0817850,  550071.6082380,  551206.5194890,  546981.3193620,  550812.6627900,  553940.7404380,  563173.4991930,  544137.5081730,  553023.9070410,  565690.7054280,  564902.5765990,  566506.3125460,  549177.2657480,  566047.0571840,  556861.2046290,  545665.0440580,  546220.0599700,  561039.6106870,  544826.9660550,  549116.8950550,  551457.8448270,  545307.6380430,  550222.6774520,  561566.0417700,  562007.9232490,  552086.6481390,  557047.4279590,  545081.0286060,  550720.4313070,  548985.0124790,  549955.0536270,  553661.3113880,  563029.6518680,  565330.0004120,  549845.5990820,  549374.9533140,  551131.8027580,  557789.6380430,  549283.7296180,  565800.9285790,  544692.2609000,  559856.1501310,  565656.1087690,  566158.7668150,  546923.1628740,  545495.0847170,  561458.8447300,  544330.9470970,  554247.0712230,  556903.9347460,  557459.6296970,  551726.1292870,  557653.5627180,  560171.2435870,  557766.6732080,  566274.4617510,  545213.4685460,  548671.1990820,  550267.0840750,  550722.6835550,  543099.7364560,  558001.2545840,  548817.4385580,  550612.4867820,  551895.5523290,  558876.9717400,  560244.0572640,  556394.6846040,  545037.2692720,  545462.5009000,  547644.9047100,  551488.5111900,  566880.6697890,  556368.3910690,  566903.1713760,  555594.4265690,  543399.7335630,  547217.3809000,  557886.1398740,  557958.4094710,  566773.4517860,  553035.1335970,  549636.2985470,  557701.1716690,  562497.8917650,  565193.1662410,  546423.6309000,  563714.2039770,  565935.9409000,  560174.9809000,  549477.1315830,  550415.7809000,  550304.1132440,  555702.2875670,  545240.4666140,  545396.0750180,  546834.6432850,  549010.0134580,  554138.6987740,  546790.5917110,  547303.1349370,  555496.8718090,  565246.4059000,  551196.1809000,  548941.9914260,  551345.5013300,  552681.4869010,  554929.8712230,  550486.8985470,  550537.8498660,  558757.4778700,  565608.7604920,  555766.1142330,  561364.0116690,  544128.7809000,  566546.0359340,  566782.6737570,  545009.7421900,  552851.1679970,  553035.4530310,  548842.7249000,  551919.3045730,  548193.9695790,  548301.3022050,  549236.5670270,  549060.3691350,  549534.8475670,  547487.3027390,  559380.4629280,  543590.7575300,  548445.3364560,  552917.5067060,  555719.6867820,  548076.0049000,  545049.4059000,  551265.3809000,  555595.1842150,  566994.3142330,  546141.0068960,  562166.2133320,  545364.2373070,  547278.7671260,  543131.3755890,  545274.6899910,  546704.2892850,  553035.7809000,  565642.8995440,  549387.8356950,  555609.6510300,  543618.2473540,  560408.8931990,  559602.3039900,  544892.3130310,  548321.0574960,  549735.5309000,  551682.3166140,  564500.0065410,  543452.0209000,  546439.8360720,  555702.4325850,  561274.7269900,  562153.7809000,  567319.7428050,  551687.5586780,  565105.5091230,  566510.6380430,  546560.9142330,  557925.2022200,  566603.9990820,  551259.8486970,  557814.2646910,  563306.7398040,  549114.3895960,  552231.9409000,  561079.4994930,  566809.1282680,  549401.0317830,  551895.7602280,  543645.8473650,  547796.0931680,  551291.2822310,  557535.1095430,  559855.7925960,  551526.3493210,  550365.6291760,  546819.2315020,  550289.5809000,  552674.1742520,  555546.5868700,  560244.8131580,  562103.5001980,  564723.7809000,  567649.7527310,  544048.9777280,  549128.0616020,  560692.3780960,  561169.3809000,  550787.4475670,  558789.1456060,  561057.5544850,  550233.8779870,  555313.0951860,  550073.1004880,  553004.8718090,  567792.3939270,  562164.7988210,  546856.6156830,  550894.7142330,  554591.6944140,  561449.4549440,  566279.5857780,  549946.8267140,  552943.0708410,  566096.5356170,  550340.4534660,  545217.4430620,  549176.5721090,  566636.8632530,  567169.4525420,  551361.1634610,  560039.7013420,  560702.6130170,  547025.6410130,  547384.6230050,  550662.3434000,  568197.7009000,  561101.8630920,  566696.6536270,  547171.5510150,  549508.0994840,  558869.7182630,  558654.8043740,  561278.0031220,  545087.1914260,  567071.0159310,  568125.3691350,  548202.3005850,  549421.7557430,  567964.0340650,  550083.0016790,  567846.7405410,  550833.2354450,  552356.4402410,  565836.7056910,  565979.9145760,  550205.0268020,  543751.8305890,  554847.9285920,  547693.7009000,  549904.9982910,  552242.8121040,  552960.6887010,  558912.4788870,  547122.9358300,  551271.7809000,  559824.7505970,  552593.4849360,  566291.7809000,  547018.3523290,  548978.3223090,  549967.5360020,  559961.1978740,  568505.1762490,  556843.8707880,  565135.4059000,  548065.3669870,  568634.7659750,  546737.1401230,  543952.6067060,  558527.5990820,  566372.3766450,  550124.2380430,  553220.1668650,  568383.7809000,  560962.3655150,  553305.6718090,  566778.8270540,  561155.1215590,  561401.2005640,  567509.0919180,  555442.4239160,  548733.6756370,  549844.1077480,  551917.6971790,  561072.5330370,  568538.2094710,  547807.6867820,  564742.3426980,  543279.0464740,  545509.5787490,  553072.9669470,  556284.4431880,  564553.2432660,  550437.1142330,  552051.0089700,  560772.0567620,  567168.2585120,  559741.3999480,  567803.1241840,  552236.8834640,  568133.1523290,  555086.0307790,  559770.7196760,  565074.5477660,  556563.8671280,  544747.4846040,  549708.2883930,  555814.2424380,  562644.5809000,  566771.1380430,  568747.4732080,  554002.8993730,  564357.2668810,  561698.6265380,  557211.9619470,  547937.5837170,  548359.4347260,  567870.3263550,  567895.9713760,  543183.3335780,  565400.8843480,  544000.9185150,  562043.4279590,  546970.6735550,  563265.2288930,  549879.1016550,  555282.7282680,  561929.4135530,  568312.3762490,  561670.6314750,  562199.2094710,  560999.7101040,  564502.7962850,  543143.6899910,  568844.8389650,  568395.1241840,  543046.1995050,  556497.9695790,  566109.3809000,  566373.6054610,  568130.2424380,  567616.2890670,  545471.5228350,  558537.9744480,  550452.9225490,  546578.6388060,  551114.9914260,  546821.1753950,  546894.6485470,  559441.7336080,  543787.3484680,  548324.6720920,  558410.3758820,  546036.1706440,  558689.3886480,  553193.8222790,  553265.0260680,  554222.5674170,  555392.8951860,  558339.7270880,  559971.4732080,  564507.5456060,  565611.7054280,  543094.5364560,  559996.4910890,  565616.6189950,  554448.6319640,  569098.9667410,  550134.0511700,  560697.4316940,  560815.7809000,  569018.1545260,  545314.2253440,  557883.6962940,  555124.2889040,  560553.4209740,  568292.9573710,  554484.8910320,  553043.1409000,  561055.2329550,  551000.9192400,  555097.1628950,  549027.1297370,  548222.0392370,  547546.7779850,  554128.9445360,  546083.1357390,  562014.3924700,  545970.3072160,  549568.9169950,  566149.3678570,  550347.5271240,  559503.6057180,  562582.4475670,  547191.4846040,  549195.9188310,  546410.4978810,  552978.5309000,  553134.3691350,  559758.2156830,  566505.2623810,  548501.7289920,  552266.4931510,  560897.9809000,  566262.1809000,  547787.1688000,  553338.4475670,  562162.3809000,  562376.0595070,  545954.2925280,  554544.6200610,  555277.9204350,  565223.2556470,  545312.9171510,  551350.4796160,  554905.1656850,  546030.0951010,  560126.5657100,  569057.1579490,  546452.0872060,  559909.9204350,  567057.9320370,  561020.4889460,  554718.5126070,  566721.8729310,  545306.9413940,  552818.0031220,  565907.4380430,  567046.5586780,  545976.3846740,  562350.4270540,  563522.5501310,  566434.2809000,  548814.1173140,  549119.7809000,  559462.0771960,  561901.8920110,  565104.9122130,  545490.2613470,  568217.0870220,  544995.5360960,  546992.2866470,  550474.0104080,  562587.8175970,  546766.4851250,  546871.4907450,  566461.1682050,  568148.5037920,  551055.2787600,  568863.9495750,  548266.8106340,  555179.7809000,  546264.9789680,  568971.7809000,  545747.8999260,  551636.8290280,  545188.1121100,  549054.1809000,  550682.5150770,  560234.9907770,  554840.4425540,  545653.3900950,  545799.9362400,  555275.7954450,  548037.8671750,  551843.0485060,  563922.9776210,  553003.1493210,  561793.3011490,  564559.0916690,  559819.7809000,  569156.7332810,  545366.9965860,  550570.8920110,  554045.4536270,  559568.9023950,  566476.5621500,  567397.1334180,  545094.7730260,  546066.3340910,  546568.3680560,  548402.3345720,  548130.0906110,  550338.3845750,  568810.4475670,  554142.7228350,  564397.8425740,  566703.5757720,  559245.7809000,  563595.0004120,  550962.7128370,  560843.7486050,  560303.5045730,  545956.6956980,  551321.7304800,  563590.5456060,  565594.4885920,  568621.1988890,  546952.8718090,  557511.9015320,  564154.7395370,  569121.2291760,  552919.6106870,  554767.3999480,  545438.0417700,  559928.8209000,  564219.4478780,  545656.8065410,  549941.3570250,  553132.2647160,  542879.4143230,  545192.0771960,  545874.1064810,  546138.0031220,  551310.4836030,  564540.5550940,  566131.3523290,  555669.0411740,  559470.6794510,  565039.3809000,  546844.7967730,  559353.2981410,  546939.0462060,  557689.3312880,  545520.5910270,  553956.9902020,  545995.7809000,  546081.6547740,  560020.8361150,  557043.7482620,  545016.1445360,  547174.7837120,  550893.7742990,  547103.5757720,  565423.8688120,  548919.9202730,  551275.0261830,  559301.5352860,  567442.7210710,  561992.8164330,  550882.7249000,  551392.9852010,  559589.3121500,  561128.9076610,  561199.5366250,  562498.8639560,  567812.9639990,  554727.0261830,  558104.9538020,  565968.7945990,  566879.2354450,  546210.4309000,  554578.5472550,  555914.9181550,  557710.8138670,  559047.5393540,  561307.5540770,  562143.7809000,  568210.5843190,  569029.6507220,  548189.4898200,  549286.3765330,  562025.9695790,  555701.0253440,  553812.5128150,  564581.5809000,  567564.6151250,  549490.1606470,  559496.2337300,  566454.0709760,  566499.2094710,  543566.0554100,  546453.6803410,  556076.4784030,  551728.5866550,  545395.1307620,  551655.0623370,  544648.7679130,  554776.6062970,  555779.1467540,  561149.5827020,  549685.1912340,  554309.5690140,  568934.7703740,  550988.2647710,  564132.2094710,  566767.5720230,  551224.0567620,  553187.6069870,  554718.1512700,  559237.8082970,  559419.6017960,  566625.2354450,  548415.5766450,  552138.6899910,  555904.5924940,  568146.6576470,  554486.3450030,  555001.9272410,  557844.3523290,  564853.1762490,  567051.8372380,  554889.3154270,  558956.1037030,  562277.1142330,  548471.4790130,  550162.7843700,  557775.4447660,  562535.7809000,  564216.6230050,  565741.5790650,  560786.1809000,  563526.4589190,  551926.4747780,  556201.3243460,  559884.4591610,  563546.2210540,  553426.2483700,  559034.0666140,  558936.4849000,  562407.9039770,  549585.9430620,  560053.2907040,  544928.8767900,  563393.0222790,  564998.7809000,  564350.5635090,  548362.9261990,  568509.9214410,  544601.2167970,  546631.7925450,  556739.7193620,  566223.8454160,  566995.6809000,  544860.6018610,  545318.7711910,  547253.0198380,  561776.6792050,  563951.7181060,  566527.0586780,  555267.8712950,  555717.1863050,  559753.1801400,  545383.0098160,  548498.3340910,  554814.6230050,  559177.1767330,  564890.0511700,  568329.6129610,  544700.9684000,  545436.1840010,  566594.6637830,  546203.6820240,  554417.9215030,  566455.9377630,  549151.6354450,  562481.3393420,  543256.3969650,  559853.3550940,  545992.9344760,  558412.7362640,  555470.5888750,  550305.7325910,  553214.8613600,  566850.6432850,  564498.8052900,  542690.1712840,  551343.2185420,  560157.1974540,  564312.7505970,  546645.9491240,  553682.9469780,  550799.7755740,  553415.6453070,  565657.0609000,  545071.0148390,  545197.0666140,  545723.2903340,  546456.3962850,  554299.1715870,  556464.0362190,  569058.5990820,  561584.1009000,  547296.8215500,  549374.0907590,  551523.1142330,  558601.9214410,  562018.4575360,  564882.6724660,  567865.1722040,  546531.8847960,  551941.0899910,  554724.8619810,  556584.5184890,  551655.7809000,  562206.9645730,  565304.0204830,  566365.1142330,  567937.1467540,  545807.3613200,  549828.6518680,  550583.6045220,  563590.2156830,  564154.0566760,  567565.0491930,  549102.2034350,  558054.0893920,  566763.8985470,  544451.3626380,  551188.0516930,  556811.9973440,  555107.0632920,  546756.7633560,  560097.2443150,  544642.0373100,  546111.0734170,  547915.8834640,  562284.8005080,  551097.2277090,  557211.9233660,  553103.8373970,  567133.1142330,  550192.4790820,  553251.2978080,  553427.2413650,  562374.8317470,  566908.9516320,  567230.9865740,  544130.1470970,  554857.4232840,  563968.8513230,  564221.9347460,  551453.1857260,  553580.8335320,  555277.3242070,  562099.1913960,  562191.9792470,  568618.7453670,  542987.6250560,  567326.7711910,  566984.3766450,  552279.2805410,  547122.6038030,  560364.6318670,  565559.1467540,  551245.7383470,  567650.9436910,  566697.8393800,  544907.6327520,  546238.1064810,  552355.5809000,  558595.5200300,  546105.1572440,  567053.1142330,  567574.9809000,  551938.3026390,  552921.7027750,  549664.2285190,  556363.3022680,  553163.8499550,  561345.1962850,  542691.1655150,  559687.2094710,  561623.8191170,  560811.2369000,  567500.8219960,  546736.9627180,  553470.0966890,  555430.7596230,  560850.4214870,  565486.2863950,  568343.1115770,  546429.1559000,  554315.7392330,  544987.3809000,  552615.2267870,  552843.7131030,  553729.9337240,  556421.8722710,  568586.9507110,  543936.1711440,  559761.1655150,  563369.9530850,  563881.4697890,  568982.5934000,  542758.9573710,  544620.6512700,  552270.6504650,  554616.8475670,  543511.7424380,  559768.8555270,  542475.0101790,  557409.1797020,  544831.8920110,  546412.3903350,  552327.8642330,  557352.3191590,  553000.8971790,  554546.3628070,  544835.0677220,  565938.9533140,  554377.1926650,  561948.9558170,  566160.4867820,  546660.4124790,  557044.0809000,  561510.3942330,  568529.7383470,  552927.2629140,  559006.6580930,  560942.8236350,  551859.8005270,  553928.3962850,  551764.5376570,  553119.9318430,  553293.0586780,  568586.5445360,  552735.7809000,  554778.3749050,  556044.3450430,  555883.5228350,  568634.7609000,  542920.1282820,  544803.7809000,  553992.1519780,  553209.9188310,  553724.3347460,  552310.2199240,  564526.2156830,  568936.7887740,  546561.2456890,  552111.9942330,  550035.1833990,  551428.9387950,  557628.8956540,  563328.9781790,  564110.9573710,  560833.3887430,  553450.9490420,  566026.9645730,  568674.0920110,  564366.6120690,  560994.3667590,  565227.8048520,  566161.6771960,  561614.9028510,  561713.8894270,  560509.0750180,  549828.1380430,  551616.0767200,  559443.0668340,  556622.9744050,  567279.4925080,  563117.5862100,  552571.2545840,  558704.5087800,  545652.2966590,  555987.9059000,  566887.9519210,  544899.4213490,  552309.7237570,  553143.8315330,  568680.4666140,  555265.4219260,  543555.1142330,  548691.8018420,  553925.0965150,  555332.6001770,  545170.9374070,  550763.1016550,  565969.1142330,  566027.4300230,  561401.6963930,  568841.7568040,  553400.6084860,  561627.9347460,  553011.6142330,  555762.4317880,  557133.8486970,  565922.3855510,  543835.0462060,  555374.9746980,  544070.0742330,  565177.9142330,  560770.7486420,  547708.3555480,  556927.6985950,  547415.5384760,  565403.5848220,  543173.8439370,  549142.9975380,  565265.9093400,  544622.7559000,  557423.6706240,  558889.4140740,  566735.2475670,  554164.0335320,  560884.1884470,  565969.2903340,  566913.6157620,  568882.4475670,  562076.0744510,  568119.7809000,  551542.8718090,  553025.3598470,  564740.1265790,  550109.8609000,  561845.3715130,  545179.1432190,  547785.3642330,  561469.2209000,  561688.0885920,  566082.9873780,  560512.9095310,  547476.9475670,  557800.9205010,  562761.5118560,  564586.2125110,  567395.8660060,  544436.1219850,  550718.6461480,  547350.0399230,  543134.9516320,  567589.6049000,  550915.5623300,  545908.4475670,  568808.7809000,  546307.7809000,  566086.3185340,  549363.6362090,  544816.8454160,  545668.3523290,  546574.0171200,  553585.9589100,  547810.3014480,  551482.6168790,  552937.8947210,  554763.9133500,  562247.9616910,  548849.2600310,  551179.5764440,  552833.8732080,  568001.4841260,  552077.8761380,  562438.3855510,  563383.0261830,  564049.4135530,  564276.5580430,  564447.0161940,  567715.7904470,  544404.5981040,  548022.3048040,  550751.1220760,  561497.4710410,  562404.4768580,  545749.0365630,  548919.7220760,  560217.2308270,  563214.9425900,  568701.0401590,  545930.3999480,  550235.0139380,  560803.4609000,  551162.5501310,  548577.3908710,  549263.0414040,  550143.3237570,  560981.9553970,  567518.4428220,  545351.0153830,  547779.8861630,  567416.2156830,  548535.6078720,  548266.6750320,  555193.6009170,  556678.0666140,  565829.7809000,  551933.3368340,  560642.3637090,  564571.6327520,  546159.2614190,  547905.3809000,  558619.4121060,  561222.4307280,  568844.9957150,  545014.7809000,  545012.0678200,  557680.0994440,  558567.6106870,  558769.9672350,  564245.6584510,  549083.3383840,  559249.6413650,  562991.8102040,  557342.5177420,  563557.0253440,  546463.6793770,  551448.5679620,  568676.4333820,  557506.4110370,  563027.0440580,  563157.7562090,  546892.9440210,  545152.5345230,  558019.9351250,  561571.3709280,  564176.4651110,  566206.3142330,  567158.1742050,  567760.1573710,  562040.9943830,  566475.0189950,  550359.6453070,  556032.7604920,  560172.7809000,  568708.4814650,  559791.5643060,  566352.7505970,  566814.3142330,  552170.5635090,  559314.9973950,  559317.0491930,  567165.1142330,  545267.8824230,  546194.9445360,  561138.7688520,  566908.0508390,  563821.4475670,  568113.4266140,  546366.7809000,  562608.7170700,  565688.6583190,  554572.5809000,  554627.4448340,  562234.8369270,  552864.7178370,  558494.6646210,  555542.3263550,  546631.2882310,  547740.6677780,  564127.8958280,  546883.5607430,  548849.1073250,  554176.5428050,  548346.5966890,  545358.1052240,  545604.4074060,  556089.6818900,  547389.9548130,  551915.8697890,  560543.4392330,  561448.2809000,  566607.7809000,  544787.9290480,  560851.6405490,  561106.9457350,  549910.8282080,  564395.8625330,  555697.7948860,  565330.5177420,  546699.4130840,  553538.9324150,  565555.2094710,  555204.0189950,  561797.6380430,  565522.8712430,  566985.8861630,  567933.1200300,  568733.0732080,  560165.5352860,  561156.7664070,  563291.8593310,  565028.0376020,  555719.8120280,  556049.7481130,  560085.9017050,  545921.4693950,  558050.8349040,  544812.9930210,  552017.3193620,  546971.3787840,  560366.0209000,  548748.1142330,  555155.3271640,  542700.2147750,  564142.5081730,  564687.5948530,  567707.3938030,  567575.3662130,  553193.3193620,  566552.4738130,  567389.1744480,  561887.2246090,  567280.2437100,  568386.9818860,  546378.9607110,  554417.2167970,  563474.7405290,  560419.4778700,  563524.3842520,  567134.0285190,  543228.4434770,  555769.0951860,  563237.8349540,  563471.2354450,  545745.5369980,  546153.8130540,  544541.1142330,  561608.4124790,  548120.2956620,  553856.7958250,  562452.5737840,  558902.6113570,  560736.9315850,  550115.8601080,  562879.6463050,  562347.4258700,  546374.3895960,  547061.3682020,  548547.6209000,  553113.8525480,  563431.7505970,  564051.6227080,  565542.7650270,  567786.2129000,  555982.7011450,  561951.4392630,  567788.4353410,  543287.4360160,  549038.4658320,  568623.5904240,  544957.4928000,  561731.4278370,  564575.7809000,  566746.5309000,  550366.1809000,  555663.9648080,  561986.9616230,  555327.7809000,  545625.6159520,  568706.3922990,  548366.6972350,  548731.2525980,  561389.4823930,  553945.1777250,  546361.5464170,  559549.5087110,  545775.4732080,  558259.4419950,  543004.4999410,  556325.1142330,  545163.1411310,  553764.3843060,  563092.4374140,  563615.8739230,  565154.4791250,  544954.1415560,  546247.8040210,  550258.7406520,  563845.0440580,  545728.8619810,  554256.7361240,  562265.2839300,  543331.2403590,  553382.2082500,  560476.8041560,  561042.7785800,  555772.6931810,  555915.7256000,  565171.1396790,  567321.4512300,  542524.1582580,  544630.1809000,  556063.4475670,  563660.1353300,  564635.5470540,  566666.2367140,  567872.2354450,  568442.5635090,  547944.3604050,  553521.2314490,  555467.5849350,  567677.1142330,  561545.4570900,  565563.3706440,  542686.9036150,  548446.3849270,  567661.8129860,  557028.6165040,  546890.1418340,  547443.2060210,  549204.8380430,  549903.7759090,  558790.9673410,  563474.4533890,  562153.8562500,  564241.3578230,  563295.4404740,  550522.8988780,  555657.5586780,  547103.8854750,  554210.0492740,  565744.6616340,  547180.1830740,  544424.9078570,  544913.1228350,  552999.2019530,  560254.1257280,  560910.3462500,  561590.8765520,  565810.6101680,  542805.1872930,  554246.8285190,  563277.7809000,  567256.1529930,  544836.4155150,  550143.0818710,  555330.8920110,  559257.0440580,  548854.5765990,  553885.0380430,  565179.4732080,  566964.6142330,  544252.1206260,  548604.4267330,  545631.9651110,  566806.3773910,  554669.9039230,  567966.7322740,  568419.6947460,  547003.9108640,  549008.7141000,  543232.7072160,  566544.1061030,  543006.2657480,  554015.5809000,  562518.5795350,  555881.2623810,  543811.1791300,  566893.5622770,  565340.1287260,  545801.7543750,  549113.5928660,  552184.0567620,  560487.5024190,  561511.6327520,  564782.6380430,  546957.0369390,  548612.6697890,  544996.7220760,  546256.3523290,  546356.5809000,  555599.9760220,  566688.4475670,  545488.2721770,  553026.8578230,  559186.5204520,  564476.0637280,  565011.3157840,  567571.5703740,  542505.3691350,  546094.7292570,  549771.8951860,  554133.9763890,  564970.3084360,  565889.2253440,  557189.7692040,  545805.7119340,  549532.4857540,  549663.4088070,  564567.2270540,  559376.9598470,  546551.4596150,  542878.1836540,  561871.4886130,  542692.5049360,  563987.5456060,  543370.8876960,  546762.5228350,  548345.2956930,  543078.4775290,  559062.0634850,  544585.5286710,  543254.0068410,  544773.4951860,  545945.4792240,  547182.7809000,  567881.5873520,  555081.7269540,  545020.0794070,  555997.0536270,  559495.1397850,  558459.3748850,  543728.0309000,  552047.0345440,  552326.9848800,  554773.8268290,  558802.2615200,  561324.0362190,  553150.7113810,  554073.8172640,  565217.5586780,  566710.7206590,  567354.2514880,  546709.9523290,  567242.4475670,  565367.7226510,  567693.1938350,  559838.2094710,  567596.8905770,  564887.6209000,  566792.7129390,  554260.0504420,  564267.3364560,  556060.8217600,  563480.8930080,  545346.8897080,  542580.7464170,  549833.3075520,  552110.8920110,  562754.1342230,  559853.5536540,  562387.0163570,  553941.7244030,  560045.2020760,  565709.9031490,  544996.4742330,  547936.6907860,  559539.1655150,  565980.5275670,  546228.6181090,  552976.3142330,  559397.1142330,  561366.3039770,  562160.8756370,  546470.5268460,  554401.2724250,  555109.4250720,  558698.5978010,  559890.2156830,  560596.9094990,  561993.8055050,  551454.2786210,  565842.6465720,  566995.6380430,  542152.3962850,  545326.2269430,  546957.0938770,  550128.4155670,  560401.6270540,  568657.8973020,  560459.2475670,  555179.8817400,  544781.4583190,  553688.7142330,  561403.8552920,  564587.5456060,  564655.9274200,  565420.9622470,  567463.0885920,  543283.8625330,  566147.7773300,  545222.9541520,  544403.7389710,  552500.0535570,  546672.2937210,  561798.9153260,  543808.3884950,  552882.9678920,  559256.3809000,  561575.3003350,  546327.5639510,  550312.5550940,  565184.6736040,  547383.5309000,  548992.8931990,  553326.0067060,  557716.8015900,  559681.5990820,  551374.0031220,  555467.1604010,  559131.8614370,  559282.8695080,  567916.2609000,  551691.3454160,  556601.1498840,  558986.5910980,  560132.6792200,  566937.7009000,  547270.0787720,  548672.3734930,  558448.4475670,  566346.4658320,  545514.3088380,  546296.4124790,  547142.4264980,  552893.4402480,  564827.1580630,  546195.3157840,  550195.7809000,  555349.0657480,  562156.5939080,  567704.5063410,  555484.6809000,  557674.5564100,  555588.8234140,  558558.4674670,  560772.4316180,  558315.5617220,  561140.8423250,  546139.4846040,  542270.5256700,  553451.2094710,  566135.2403590,  559816.5000010,  563046.8397240,  567134.5001280,  549249.0116690,  566453.3676770,  568613.9209000,  549913.4279590,  545442.7809000,  558487.1107430,  559534.1592780,  551865.9093400,  543100.3962850,  547507.6270540,  552966.2636590,  559712.4260610,  547612.3388810,  555828.2893750,  561523.6069870,  566109.5674610,  567300.3809000,  561691.1472370,  548991.8250990,  550595.4062880,  565787.4059000,  545385.7248250,  555701.4306180,  547411.4419170,  557679.5857780,  561954.2101240,  549524.4969780,  547227.7809000,  553800.3962850,  559941.7436330,  545393.7507490,  546648.2577210,  547144.0567620,  565919.8990520,  545124.3373300,  557779.6872500,  566571.2809000,  566623.3356310,  555839.3364560,  560871.1048440,  563946.7733430,  553306.4475670,  558213.0967580,  558394.6337970,  566333.9774320,  544211.4833790,  544165.0042010,  546215.5186050,  549213.9168220,  546511.1787490,  559568.2732080,  565647.7809000,  549333.8274120,  567756.7006860,  557366.1105700,  561061.4703410,  553492.5809000,  561893.5112370,  565828.5421460,  553015.9295070,  550030.8605460,  552105.8205600,  560986.1431050,  547813.8415060,  542443.5336570,  547136.3436270,  558832.9475670,  545281.0574960,  548856.4489580,  554077.9495750,  555645.7959380,  563371.4042180,  565469.0232210,  544376.9237570,  547841.5343250,  551179.0039220,  546770.5696320,  567608.2937210,  567985.1962850,  544476.6697890,  546643.4651110,  564635.4289000,  566522.1566580,  548642.2335420,  549043.7369440,  559931.7809000,  565395.6596880,  565838.1223630,  545358.7945990,  550721.2094710,  559845.1376250,  562535.5857780,  565171.4678570,  563529.3757480,  547943.7809000,  556061.5349600,  547920.1497680,  554253.7697270,  544226.4785740,  544891.4298950,  552436.6142330,  549518.4059000,  554862.9324520,  546566.6809000,  548865.5922210,  542311.3854630,  559566.2313500,  545690.7881990,  552351.4846040,  552978.0545840,  559729.6094710,  565476.9237570,  565588.4601450,  567187.0536270,  546319.2354450,  548648.4809000,  561655.8279040,  552507.1263550,  555719.6280340,  566690.9881070,  567716.6841260,  542528.4569560,  553707.7606980,  559781.0666140,  561261.9523290,  566848.1445360,  568213.2066430,  565814.8475670,  559178.0508720,  565290.4588660,  564255.3535710,  562759.4655470,  566689.1338410,  567695.2862760,  562033.2944140,  549172.2679470,  563859.4154680,  549845.2443150,  548091.1346120,  550426.6630670,  555785.7248250,  562556.2809000,  565379.2771960,  566830.1482470,  545490.4475670,  547056.9185700,  555739.9684000,  560953.6939430,  566552.3734930,  553934.1312450,  543692.4705550,  552104.1052240,  555510.1223630,  560210.8640920,  560630.7598520,  552827.0958850,  553691.3553680,  555877.2545840,  559006.2439540,  561318.4591060,  561438.2253440,  561566.6944800,  562848.8456920,  568307.3042160,  543535.4951860,  561481.0339120,  561928.1074310,  567056.4114420,  548933.6856620,  556083.1831990,  560796.5515420,  561002.9113350,  561676.6609000,  565169.6012590,  565470.6609000,  565928.6899910,  546124.0846160,  549022.9546090,  564686.3485860,  560495.3352180,  559743.5904240,  564462.7742770,  549830.5241180,  554537.2229600,  544173.3949350,  545656.9700890,  560781.0031220,  562469.5106300,  562688.3054900,  566371.4309000,  566981.2635670,  544085.8799100,  553778.4135530,  562273.3949350,  564420.4020180,  547821.4876830,  543168.4221210,  549453.2163350,  550424.3016100,  552985.1854800,  554675.6327520,  559314.2370400,  562631.9942330,  562855.9475670,  563992.6697890,  565680.7633560,  565830.6142330,  567401.0184500,  551718.3364560,  561504.7974750,  564604.2740510,  565452.8229170,  544155.3764060,  558080.8801370,  543405.9627180,  547419.6429690,  549710.6828610,  552640.0156630,  555318.7600180,  561617.0116690,  545307.5223970,  546753.4356950,  553865.8861630,  546015.8875670,  566648.2628280,  566771.4861630,  563012.6409940,  562605.1838850,  566464.4475670,  560914.9992910,  564126.5645260,  552864.9686130,  556400.7514110,  548069.8741640,  555052.5216410,  565942.6756370,  566548.3884950,  549201.9987220,  554605.9819580,  555771.3364560,  563984.9076610,  546402.1851180,  558652.5809000,  559949.9581150,  565162.5009000,  566112.9884470,  548316.0821630,  547669.3658060,  550884.4376160,  546799.7809000,  553746.6975670,  549945.8549740,  566769.7809000,  565254.3773910,  564172.4182630,  543380.1640420,  560743.7809000,  546546.8167970,  542106.9135410,  562308.6303440,  545040.7088440,  566134.3332810,  559121.2676260,  561782.2626520,  566034.3754950,  543966.1118730,  553113.7964040,  560008.9508600,  563766.8765520,  560800.6989330,  562816.2747270,  566864.0666140,  546657.4583190,  551993.8578230,  555850.4094710,  563204.6788590,  566330.4475670,  566188.3366210,  551923.1655150,  561021.5369980,  562054.6756370,  563086.2160010,  548502.4718090,  552128.7069810,  565915.1142330,  562391.4237570,  544235.2483220,  545859.9420720,  567449.5586780,  560237.1203500,  546416.2970290,  549727.3263550,  559566.5591670,  564123.4350020,  544795.5163390,  546225.8967690,  566343.6270540,  563226.0920110,  559266.7157230,  568081.2354450,  543211.7508250,  554573.4635570,  562113.5409000,  542452.0885920,  551456.4376160,  553336.8427940,  555854.1809000,  563081.8985470,  566173.2734370,  553880.5777130,  561420.0389650,  559066.8986270,  559901.7144040,  566919.9005580,  555028.6293850,  558902.8578230,  564551.0852480,  566652.1190920,  550192.0634610,  553746.5715980,  555758.1599850,  558786.3450030,  568099.5112370,  552901.9367440,  545479.7258540,  541979.8421240,  562542.8005530,  549229.3523290,  552678.6320750,  546921.1810890,  553158.0322660,  554968.4826540,  558193.0702650,  560840.9084170,  559796.9746170,  554114.5271690,  561192.8368810,  561595.2507800,  564048.5148450,  553343.2354450,  558606.3562420,  564912.7528630,  546583.3120090,  559658.2587760,  567198.2435330,  554110.8172640,  554700.4653920,  561803.1807430,  566249.8420350,  551885.8425740,  554209.8062160,  558435.5336270,  567016.0324720,  567089.8407800,  543265.9067740,  552501.9085600,  563371.9393060,  552809.6495130,  561322.4328340,  544394.3571710,  544568.5281530,  557269.7416840,  558358.8163610,  560139.8221370,  565756.4638270,  542247.5511870,  546087.3962850,  566652.9315850,  551767.4993750,  567787.9548130,  561872.2356560,  560061.2027010,  544319.3301960,  553760.8179370,  552295.1907360,  558661.0514880,  566049.3900950,  558882.3962850,  562195.2504340,  566480.3142330,  566780.1003890,  546648.2101680,  554797.5249760,  561070.8995440,  562723.5241240,  567615.5350900,  542925.4402890,  544488.9237570,  548068.6536270,  553756.5809000,  555938.0885920,  560776.2706960,  561514.9844790,  553953.3916380,  555196.4376160,  559150.2224580,  559400.5524740,  553660.2529500,  554681.1559000,  557952.7486420,  558760.4366380,  559088.8540710,  564785.0382540,  566469.2990520,  566541.5483420,  559001.2188080,  567305.0870220,  552903.0401590,  562848.6033300,  547064.9169950,  546786.7234290,  565816.6428530,  555956.8387350,  563511.5533690,  555442.6262610,  549395.6338410,  553195.4861630,  567801.0870220,  548331.0074190,  554292.6124790,  558830.6626200,  560552.8207900,  560873.0440580,  546387.0304920,  550994.9825670,  567625.9463140,  553799.5194620,  559193.4512300,  546673.6497520,  554750.0554100,  558947.5142330,  565880.8131580,  552098.5237570,  561620.1338410,  562782.6998190,  546580.1496940,  550565.5220760,  551389.0075670,  553385.2796510,  547925.9713760,  559446.0775510,  566116.1845700,  548134.7196760,  560774.2636590,  561282.7404380,  561566.6380430,  559642.3077540,  566345.2412170,  555937.5660240,  549993.6136760,  564444.7785690,  565973.6820410,  555727.5534120,  562573.1142330,  562988.4988490,  563652.2204200,  547353.6025560,  553052.0360020,  562362.1577910,  544334.8776740,  554680.9237570,  559595.5350900,  560311.3041420,  564503.0016790,  550174.0759820,  552168.4437570,  553521.7925960,  562958.2766260,  566739.0930020,  544448.2253440,  552895.8356950,  560905.0182330,  561371.8890080,  562822.2466530,  559709.7595480,  560053.8217160,  561751.1165400,  552132.1618520,  552767.0089700,  560427.3637220,  560837.9563390,  562193.5904240,  545777.3392040,  550168.9237570,  552066.7809000,  561437.8397240,  566628.7760220,  551113.3292870,  563252.3593620,  565835.0089700,  559743.6632530,  562041.0135280,  552915.8834640,  554500.1796140,  558809.0648510,  552592.8397240,  549949.6756370,  548578.6946260,  565493.9578970,  563922.9797130,  546205.8033720,  557276.3910690,  567482.8343350,  567712.0958610,  551020.7195280,  553010.2298800,  555833.5328790,  562936.0283230,  547751.9431910,  559229.9277930,  561617.8998190,  542616.2417570,  550378.7213130,  559113.8732080,  562656.3852170,  553621.5488010,  560420.3734930,  562477.9591180,  564040.9723890,  551589.6230050,  562380.0031220,  561262.7945990,  543304.0846970,  563055.3434000,  565307.0378170,  566071.8492760,  566175.6453070,  566505.3128150,  567476.2609000,  547601.6069870,  551233.8434000,  553388.1287260,  561859.1340350,  565087.4543690,  541995.0750180,  549013.6825060,  553149.8483160,  563706.5216410,  567857.9787020,  554797.0007580,  560087.4521330,  565010.2253440,  565735.9127680,  559272.9907300,  566331.0750180,  543950.4053120,  565265.3454760,  549509.6722830,  546829.4935270,  542447.8770920,  559921.5433060,  551572.7145780,  549674.6044290,  552963.2329550,  550336.1938030,  567357.0574960,  547604.7220760,  560671.0435260,  561862.3480640,  566186.8153830,  551358.0389650,  565095.1655150,  547661.7149290,  550191.5990820,  562289.4404740,  563237.6380430,  542546.9507110,  563661.0183100,  559094.1809000,  565844.5501310,  547688.6750180,  565927.8570900,  543221.9322940,  549879.9606750,  550928.9896910,  553598.4817550,  558982.8166140,  559402.2649180,  560398.3085070,  562375.6354450,  547755.8213040,  552357.8253440,  553219.6017960,  560308.6899910,  549499.3887430,  552208.5774370,  563589.7699710,  550284.5281530,  560123.8684910,  548658.1163040,  560211.6809000,  558494.8815350,  567008.9838480,  563854.8520610,  546937.6033850,  550805.3999480,  546498.4123330,  568335.5087910,  548420.6895160,  552932.0718090,  559370.8188750,  566710.1142330,  542472.1559000,  550415.4330740,  541817.8985470,  548238.2204060,  568184.0278140,  565096.2253440,  549874.8743320,  562550.3263550,  564986.6101680,  547096.0720610,  563086.3263550,  551078.2401590,  555949.9617790,  566450.9266630,  546224.7701470,  547229.0629510,  553379.4861630,  555524.3326240,  556054.1962350,  557453.7516320,  559069.0324340,  560771.4837570,  567981.1540340,  548448.2966230,  549767.8920110,  565281.7244030,  566345.6076720,  547313.5106300,  549846.7962850,  565572.6656930,  565177.6413650,  553058.5320310,  563985.6574430,  546433.6219040,  549607.0690360,  561057.9191310,  552544.4178430,  566042.5711440,  568210.7189530,  541935.7809000,  549894.8052900,  562679.0734170,  566786.8739230,  561594.0618460,  565765.8899910,  546695.7162100,  546778.9809000,  553205.5990820,  558679.1306540,  561824.6334750,  567902.0373100,  546266.1577120,  553765.2964280,  563611.0189950,  547428.8898110,  547859.5775100,  551601.8578230,  553741.4392630,  559746.5568560,  546249.2545840,  547768.7672010,  558167.1459790,  555787.1767100,  559874.1205230,  566280.2380430,  566377.7400840,  552996.6860090,  554149.7809000,  557056.5818930,  549133.7809000,  542748.2685290,  548862.2534900,  565943.3445360,  560169.1142330,  563358.8995440,  568125.0222790,  543117.2209000,  563265.6718090,  547181.9885500,  549913.7119340,  559922.8867820,  566906.5186780,  546764.9930210,  547802.6314750,  550863.7000920,  554381.4517860,  560893.2443150,  563145.1033490,  565075.5703740,  544640.6576120,  551062.8293210,  553336.2035420,  561224.3898970,  546889.0959680,  553838.9237570,  564992.2499550,  542748.0362190,  543796.5528300,  546724.3263550,  562337.2647150,  542809.0276530,  560547.9142330,  567162.4747780,  546649.9333660,  565991.9078840,  553220.9982910,  557745.8193620,  562157.1409000,  566325.9196410,  554914.8441410,  562053.2325970,  563440.9417080,  567369.8732080,  550146.2162450,  559740.4502880,  559226.6697890,  565028.5428050,  556376.2742260,  566673.1441000,  564754.6489750,  552677.6639770,  549255.1731260,  564234.9175730,  553086.3434000,  565201.7651520,  557529.8514220,  563902.0636230,  557926.7218520,  565420.3990820,  559058.7215100,  560891.5922210,  546868.5981040,  547677.1655150,  561655.8401590,  546113.1722040,  552518.9674000,  554100.6801250,  556022.8506670,  560124.1265790,  561879.3895960,  562338.2475670,  551839.0061000,  559849.9936660,  561476.5116690,  563589.5263550,  547931.4732080,  551549.5761760,  558136.8687330,  548823.6367560,  562224.5148450,  552787.9914260,  561440.1911560,  567042.7722040,  550790.7030800,  546014.9679670,  550782.1378020,  566570.5559000,  560703.7722890,  553177.7716830,  562430.4475670,  564154.4964960,  547732.1445360,  561961.9684000,  563439.9202730,  547951.1990820,  566424.8843480,  549971.3967190,  554530.6023290,  563114.2951860,  565135.3706440,  550326.6196100,  555884.4147800,  561078.5927810,  561736.0484590,  563728.6867820,  555561.3611470,  556333.4457650,  563539.7081730,  564227.4992100,  565443.8087940,  566175.8158340,  547230.4330740,  547360.6148770,  561129.6676920,  561834.1809000,  567897.5413870,  546474.2424380,  554646.7438630,  554335.8312140,  560451.8962850,  562241.1722040,  565479.7809000,  558689.2063550,  566873.7809000,  547043.7397840,  563009.0116690,  567215.0855800,  554700.7729000,  548323.2923090,  549625.3564970,  565054.4034170,  542059.0644820,  556197.3428050,  544627.9209470,  546750.2595890,  558828.4969260,  564130.6142330,  564955.2494310,  547835.4951860,  553453.2145780,  548045.3053760,  548986.9285710,  556019.3737140,  560297.6375040,  561253.4193740,  565253.1142330,  565465.6718090,  549385.4723290,  551532.4124790,  560564.2446680,  566612.8219960,  555330.2078660,  561946.9627180,  565169.3142330,  547237.6429690,  563123.0586780,  546958.0459600,  548015.0309000,  549233.8549740,  550801.5586780,  553323.5384760,  557957.2570900,  565358.1809000,  549218.1959940,  553683.3434000,  546834.6044290,  551060.2824670,  560706.8331090,  554181.5940490,  548205.3566580,  565106.4475670,  566578.9201410,  550941.6200750,  550293.2710960,  566682.2342330,  554338.3590900,  542726.4801560,  560036.6580930,  565546.3043900,  542200.7084360,  562433.1926650,  553943.5202480,  544166.9704110,  549859.6382640,  562685.1627180,  557884.2609000,  557765.2734370,  565949.7892920,  547600.1129750,  548898.9945750,  550504.1732080,  554390.9387950,  566799.7809000,  541906.5564100,  546898.0373100,  549286.2613470,  550755.7245620,  560797.1602100,  564724.4867820,  557831.2591610,  564908.8005080,  547274.8031220,  553522.3174850,  557974.5809000,  565297.4609000,  565645.0222790,  567639.6892970,  542747.1190290,  543193.4624290,  562595.0895420,  567323.0830280,  550667.8847960,  555757.4654150,  564860.2475670,  542623.0536270,  561910.3450030,  547622.4224090,  549162.7622660,  554728.0467960,  563770.7053710,  545859.5126320,  548479.9276890,  564165.7388580,  543758.7963580,  546766.8966890,  561128.9133200,  544715.9030370,  565901.9475670,  567958.8613600,  557978.0143100,  564733.0053900,  563497.2925280,  554180.6239490,  560326.4853530,  561536.5045840,  548646.7809000,  561273.4525420,  561643.3899230,  565132.8110000,  565323.5142330,  566868.2019530,  550230.7132840,  563029.9059000,  567069.6403920,  568024.4059000,  550529.4583190,  555400.6936520,  559759.1655150,  562405.9728500,  567209.8321820,  567515.3706440,  564942.0198940,  550408.8411410,  560432.0062520,  563596.0809000,  553776.3523290,  566639.3809000,  545197.4371770,  559582.8850370,  559922.7312550,  549357.5456060,  561756.3905260,  562900.3852170,  544760.7370750,  562094.8611140,  547478.7709180,  561171.2911040,  553745.6994520,  554438.3575870,  554053.0297690,  563018.3615450,  563471.3809000,  564606.3464170,  564857.3247600,  567994.5364560,  544062.0410280,  545773.8090690,  550436.6259700,  560962.3222110,  563272.8179370,  567380.1087690,  552602.9113350,  554602.0978400,  559085.2778330,  561327.5140260,  566728.0771960,  559793.0676130,  562118.4150460,  566452.6436450,  553062.1297940,  554595.6327520,  548483.1942330,  565835.0168550,  554389.8200130,  556348.7828420,  567449.3402220,  545222.3336640,  550273.7809000,  561001.2101800,  557092.9247850,  561143.3425440,  553484.6125830,  554555.9627180,  560498.1809000,  567994.1081730,  558329.2685120,  553543.0228350,  561737.3495270,  562335.9059000,  566826.2129000,  547779.2376900,  548291.9572340,  563844.1809000,  560686.5534520,  561491.2376900,  543292.7039770,  547832.8905590,  553150.4574300,  562062.3809000,  566685.5902310,  560249.0138250,  560440.6044290,  562218.7398040,  565823.1722040,  549613.9347460,  562107.5360020,  542691.5752620,  549402.1009000,  565396.5357290,  565073.0593500,  548695.6600950,  556086.6387370,  548069.7076300,  561645.1389250,  559321.8399120,  548403.8328480,  554495.6388880,  557841.0362190,  550465.4951860,  559983.7809000,  562279.5097140,  552536.7809000,  561908.8024380,  564862.8726030,  544940.7220760,  545987.6017960,  549880.3606100,  566328.4027490,  566881.5922210,  545494.4059000,  567788.0034760,  548825.6856620,  549783.9194280,  563051.6223100,  553332.8421240,  561782.4363620,  562439.7809000,  549809.8055620,  555606.5262790,  565004.3646840,  550954.7365530,  546848.8671800,  558714.9679700,  560459.4116690,  559001.1859180,  563059.4933180,  544092.9526170,  549501.6939430,  553189.7091870,  545096.0031220,  566951.5926650,  552478.9160350,  548526.2636590,  553500.4765520,  566769.5719450,  544493.8424800,  547568.5294910,  548199.2194960,  548299.1729000,  550150.7962850,  553376.5882390,  558136.1590820,  561080.8756370,  562976.0197060,  567058.0286340,  544201.9387950,  545099.4330740,  557945.6094710,  560024.9237570,  561314.3198220,  555646.9719110,  560042.5586780,  562666.4011280,  567784.8619810,  568016.0645260,  551378.4341110,  557340.4354450,  557802.3469380,  560124.8809000,  553262.3655150,  562847.8761380,  549789.2456890,  558815.9212510,  558284.5468570,  568041.2235230,  543745.6213910,  560680.0537900,  568093.7364560,  564413.1573760,  543529.5428050,  559019.3364560,  568049.5752930,  553182.4674670,  561642.2907040,  554097.6041560,  566829.2277090,  552563.8385370,  560164.3999480,  561097.5343250,  561776.7809000,  564417.6380430,  563284.1364560,  548572.2253440,  560289.6856620,  562465.6540710,  566480.8578230,  544812.1171320,  566397.7163840,  558922.3444360,  563674.3034230,  548712.9902020,  557415.0747020,  551712.6777110,  541782.7613600,  567185.8847960,  544678.0309000,  554207.8809000,  564486.0920110,  546108.7380790,  549169.8603840,  560483.3809000,  550967.3445360,  556509.8217160,  560020.3490160,  566351.3879180,  567267.5255810,  549072.9445360,  557647.9895960,  563435.1771260,  564997.3688400,  544973.0031220,  548987.7809000,  541893.9282680,  550243.3635090,  554040.5635090,  549605.0556250,  563068.4638270,  559109.7128730,  547883.7081730,  543915.2160590,  548915.7809000,  553341.9276890,  563671.0167210,  566739.4352210,  543827.2949190,  555317.2533470,  562861.8851650,  544854.9721570,  554284.4638270,  557962.3039770,  541554.4287870,  543622.2609000,  545416.7194470,  564830.0649580,  566656.5480230,  541777.0870220,  549131.5857780,  552818.4172640,  564625.3418760,  565099.6429690,  544548.2354450,  551143.2826300,  544669.5483420,  558968.5081730,  563464.1213260,  544041.8434000,  548676.1845700,  553910.2108070,  558476.1969000,  563171.3280700,  564714.5946930,  564990.2238530,  566614.0378830,  544190.9279110,  559119.8868600,  544312.0616020,  566249.7809000,  566991.6596880,  565744.6709800,  559785.6100810,  565980.2460940,  545539.1207060,  558259.2886660,  548793.0959680,  550417.6169660,  567116.0839300,  548978.7744480,  542417.3193620,  545333.4583190,  564091.4375520,  544051.4651110,  545465.5024190,  548005.5758580,  566512.7511130,  566529.5332810,  553445.5990820,  559188.7538730,  563841.6309000,  544900.9406630,  549717.3081730,  557778.4760360,  558037.4934380,  560328.4849000,  545494.9206850,  547739.7809000,  548202.7764950,  556112.2064320,  544515.0759930,  547951.5594800,  551232.8243780,  552115.0475670,  563220.2204600,  564959.8861630,  552661.2981410,  547316.2645460,  565047.5228350,  545881.0969620,  546031.6899790,  556967.1441150,  552726.2893750,  557719.1195910,  545566.5395210,  563041.7099780,  541566.0643010,  552969.5352860,  553692.3055550,  558856.9550290,  547648.2380430,  548216.4108210,  551393.3319200,  564443.7412960,  563359.1472370,  565045.4583190,  548987.2499270,  551564.9237570,  565931.1634500,  547941.3699410,  548495.8236810,  555270.9006410,  555698.7638150,  564713.6179370,  547558.1922480,  547643.3193620,  550013.1790860,  555066.3594120,  556723.1966300,  552258.4861020,  547415.6367560,  548935.0734170,  547247.8904890,  549334.8054550,  567191.5766450,  558268.5435460,  544744.3809000,  541504.2019530,  551848.0693250,  560293.0161940,  566465.1722040,  564057.8022590,  542442.2403590,  549248.7754950,  555286.8578230,  557358.0056350,  541957.2692720,  559829.4631430,  565904.6809000,  548687.2264450,  563629.8134200,  564733.0253440,  541746.4215500,  544207.0483700,  546154.1142330,  565755.6013670,  545339.3103120,  547895.3598470,  566062.8170450,  547791.6453070,  546570.7908010,  546819.2856620,  550084.9032020,  552660.7809000,  562672.0062520,  566568.7247200,  549092.9129750,  549800.2872290,  558502.8285190,  545253.0198380,  546998.5031220,  547905.1004880,  548765.6175200,  549959.3534190,  554062.1321940,  554498.0666140,  566284.7039770,  546064.9122130,  559770.0779300,  543778.8065410,  563467.4330740,  565540.2829240,  544045.0109680,  548081.5323790,  563124.7479760,  557179.4144880,  562349.8557760,  550663.8748200,  560116.3340620,  551698.4197630,  567327.0268770,  541893.5655150,  544795.7068260,  548411.2276290,  552043.0111410,  565889.4599120,  559077.0021890,  566404.2440580,  567967.7406990,  545549.7809000,  548889.1766450,  552447.5142330,  557800.2296660,  565652.5309000,  566133.5797170,  558969.3223630,  559486.7775350,  561927.5990820,  562873.4204760,  545145.2189830,  561912.9712110,  544898.2449000,  546879.1192460,  559140.3718090,  563344.1391090,  564979.1851550,  542438.5957150,  548618.3571710,  555049.5530570,  566952.7685540,  563146.8920110,  565411.3658060,  565777.1686550,  566152.4988490,  543829.3818910,  544355.0168550,  559231.8328480,  551961.1302980,  546536.3451860,  567733.9043570,  555957.1321500,  558631.0974830,  561796.6356010,  558209.5873520,  567416.9536750,  548519.7809000,  557998.5156930,  560347.7517030,  566069.8985470,  555386.6899910,  555477.8186360,  566342.3043900,  546857.8274120,  554398.2809000,  564341.1926650,  565955.2655630,  541629.3292870,  544479.3384330,  544789.1142330,  548748.1725080,  544682.8920110,  549219.2984880,  554660.9809000,  541906.7953930,  542378.2792390,  548621.3160350,  553891.6380430,  563571.7359560,  565153.5230450,  545546.8959440,  546098.0274750,  560972.7214940,  563891.6951090,  564749.0380430,  565220.6412770,  566331.0241430,  550246.7388380,  545828.4632350,  562429.6402480,  562797.3481510,  559893.8648690,  553579.8024050,  558290.9870070,  565994.0359340,  566167.9842900,  544708.4354450,  546886.0787720,  562240.4826540,  565462.7052700,  544888.4569560,  547982.8276290,  563620.0180540,  549653.7068260,  549774.5715980,  564843.6209000,  567494.5809000,  548386.9951860,  550288.8413650,  565877.5990820,  541552.0152100,  553820.8642330,  566414.7668150,  549952.9518720,  560001.6169660,  554900.5189740,  551844.4802010,  560671.4846040,  551377.0089510,  556663.1463790,  549728.5445360,  562216.0150460,  562756.5872240,  564165.1315490,  565215.2809000,  549318.3743070,  563105.2192360,  563777.5843680,  563200.2094710,  545058.1679970,  546023.0189950,  544474.0666140,  548572.9009000,  561781.2235230,  563640.6319640,  567855.0712230,  560920.0625900,  546077.2492540,  546201.6612420,  560060.5510860,  564451.7349230,  565164.8270540,  545488.2418050,  550021.3694170,  552508.0725670,  563120.3962850,  563526.7654200,  565989.6291760,  556068.2740510,  561996.8005080,  562616.1964840,  563424.0389650,  564323.0509730,  565755.3649000,  563910.9707730,  567174.0031220,  564403.8443920,  549674.5715980,  553984.4686580,  548211.3364560,  551964.1373360,  549878.7773160,  553604.0983600,  559879.1384130,  552540.2325300,  567712.7548130,  545873.2354450,  557338.3969340,  542988.6684940,  553908.7039770,  558560.8422330,  561960.0899130,  546119.1990820,  563795.5339860,  553304.2491930,  553424.2133320,  556085.1827850,  560899.7349230,  560914.0209000,  565983.0852480,  547068.5981040,  548023.2179370,  549732.4260610,  552027.6571890,  565592.7099320,  566417.5922210,  558067.5360020,  558314.4038510,  566167.0734170,  552257.3809000,  563566.6196100,  562624.2019530,  562918.4496400,  544817.3176230,  560759.1322510,  567017.1142330,  544412.6293850,  561513.1574770,  566930.1668650,  561540.9982910,  556887.3034090,  542816.0536930,  557624.6314260,  542756.9857190,  547342.6588270,  560419.8523290,  564535.5757720,  557976.3548910,  562497.7068260,  547281.4219260,  548115.2647710,  549192.3076490,  564549.0536270,  547899.4977140,  561424.5309000,  547781.7809000,  556245.4451340,  544501.2094710,  544638.9603870,  546229.8642330,  556055.8609000,  562475.3671070,  563566.6380430,  563155.9220760,  544714.7945990,  544910.8478980,  545236.6841260,  544591.0189950,  544998.4150460,  545969.5848220,  545255.3542330,  547769.5309000,  550137.2137360,  557057.4903020,  565161.8709900,  566122.0997410,  552484.3951700,  553198.6796850,  543413.7809000,  543917.7187880,  566494.3579750,  559862.5935320,  553954.4927640,  548788.4219260,  560264.7491730,  558559.1199160,  564459.5142330,  566669.4025220,  543598.7398910,  555610.3670530,  543068.7039770,  560606.5965420,  565685.1802810,  559131.7094710,  561632.0530090,  567616.7956990,  544338.0556450,  544500.4742330,  553425.1744480,  565890.8285190,  562366.0511700,  547271.2751530,  550038.4094710,  564129.2583770,  547599.3497620,  565866.0885920,  543145.2354450,  560305.1347460,  565441.4186950,  546013.5744480,  551849.3809000,  553802.5357640,  560332.4684000,  550248.9723890,  563285.9162380,  543597.6825390,  553405.6659570,  563772.4867820,  565019.3861630,  550292.6504650,  555170.9113350,  563678.5645260,  542255.9467860,  553684.4124790,  548498.8966890,  555562.0197060,  559873.1142330,  566388.8652370,  553354.4475670,  554476.6419930,  547470.5395210,  551371.6478620,  556249.1507630,  543657.3676770,  565436.6951860,  543965.2209000,  561995.2897680,  564533.2765520,  547974.8920110,  549955.0927280,  550218.9341850,  553041.8910240,  559141.8861630,  560407.1300530,  562378.8458350,  550745.9904240,  565177.2578230,  565383.1955340,  548603.3809000,  548793.5173340,  545957.1142330,  554080.4987460,  545327.7809000,  555601.3479100,  546943.8789390,  544947.6632530,  553883.0966890,  562101.0231760,  563492.6612090,  544195.1662900,  545122.9387950,  565515.7359560,  546387.2094710,  546717.8044290,  565557.2591610,  549360.9902020,  560723.5345660,  561966.8112030,  545863.3434000,  547726.0031220,  545725.5075190,  550133.9744480,  550245.9347460,  562635.1142330,  557816.6129000,  548945.8296800,  543857.2718090,  545664.8169930,  547827.4781110,  550508.3846740,  552674.7077290,  555313.9347460,  558156.6293850,  549040.3263550,  545462.7782050,  546150.9643320,  546496.1034810,  565375.7809000,  544394.7326240,  549709.6309000,  559103.6845140,  567335.4339610,  561389.2607530,  544878.4840960,  541573.0735830,  542667.5390400,  557531.9059000,  544596.1697890,  563880.1391090,  546580.3035130,  546707.5456940,  552568.2253440,  557607.8867600,  561548.8061710,  565449.4018150,  557822.5224730,  565509.5740030,  543424.0918000,  544705.0602830,  560122.7731080,  562443.7402220,  551678.0966890,  543033.5106300,  555967.2458270,  561590.1501760,  563669.1662660,  565286.6559000,  550506.3833100,  552693.6201860,  543651.7253440,  547179.9409000,  558897.6525220,  543718.7596230,  562149.6856620,  554012.2094710,  543800.8243780,  559844.3766450,  563053.7730810,  555043.6132120,  552866.8603980,  561772.9825460,  549938.5890630,  555068.8433090,  567689.8309000,  547912.0051990,  549446.0953570,  549678.7182650,  563440.3103120,  557976.4630710,  559154.2549530,  553358.1124120,  557931.2611260,  565342.7374220,  541398.7809000,  544804.7745310,  562559.3103120,  565069.3561900,  567764.8435870,  544603.6094710,  544726.4613120,  553023.4985470,  544472.0593810,  552438.7502250,  552502.3089000,  561395.0979730,  564370.4637470,  548816.5081730,  546793.7751690,  558410.6075910,  562735.9332810,  541360.0200630,  558482.9982910,  560610.2424380,  559091.9377630,  543449.8861630,  555410.7282680,  557501.4896380,  543240.7294830,  550092.7242960,  562322.0445660,  557941.0929000,  559587.0604340,  549768.9009000,  553597.3256870,  565741.4631430,  544894.0885920,  553594.8662240,  561755.2507800,  547899.9180430,  558061.6612420,  562374.0966890,  542085.5063900,  542273.4440380,  561902.1922480,  555483.6920110,  559396.2514880,  553175.5482380,  564208.5216410,  558780.3763690,  559037.5740030,  561442.8475670,  557699.9691350,  558308.0475670,  559768.1809000,  564312.3026390,  546978.0765520,  562280.8642330,  565620.6673860,  544742.7161520,  551619.5583240,  559956.7918890,  551203.6650380,  559203.7809000,  543244.9982910,  547423.6929880,  550997.1809000,  562805.6756370,  563873.4951860,  541814.8718090,  542812.9185150,  562304.2354450,  567354.3935280,  553975.6819870,  559673.2758490,  547028.8219960,  547970.9476320,  563401.7346950,  541524.1341760,  551966.3840050,  562784.5090670,  547330.9368630,  554036.2460160,  558125.9877970,  560494.0666140,  561872.4512910,  563265.5774310,  562681.2002550,  555394.2078660,  543815.7809000,  557704.9835140,  543510.7184000,  544321.6542490,  557492.3757720,  541431.9083900,  564087.1082270,  565012.9057730,  544659.4460980,  541208.5702740,  549096.5809000,  563354.7419390,  564320.7072160,  559351.9340100,  543695.0137770,  558365.5142330,  557964.7723530,  555418.9616230,  547153.0852480,  549531.0764970,  560048.4970900,  550956.9407170,  558052.3347460,  564413.8498660,  558137.7701670,  547441.0821050,  552336.7604160,  552956.1752660,  546026.8506670,  554877.2490650,  550980.5412310,  545743.9417210,  564572.8471560,  561511.6320630,  545250.0939230,  554578.6027990,  561460.0609000,  542936.9651900,  559964.7464170,  561141.5343250,  546545.0207520,  557453.2591610,  561082.2780100,  562901.5990820,  543242.3642330,  547313.9627180,  559493.0868550,  565928.3098260,  541477.8609000,  551956.7848840,  558109.6756370,  549792.4505040,  555152.6096970,  541539.8904890,  547887.7809000,  553239.1749130,  558218.3855510,  561274.4867820,  565698.7158110,  552139.9681340,  552927.9652320,  556611.6209000,  564768.4362670,  565764.9454570,  547955.6031220,  547038.3840750,  549033.2218840,  559788.0858330,  565188.1087690,  543766.5501310,  549645.7061340,  565380.3347460,  547664.0356770,  560045.0411740,  550126.6697890,  562770.7110200,  561386.7886520,  562130.4084030,  542739.1538220,  544018.7506900,  549566.9522150,  563025.8549740,  558333.9600040,  562599.0079170,  565383.5501310,  548360.8769670,  547277.5719450,  549448.6352690,  565277.2710960,  544529.2737230,  557767.3598470,  564314.2055580,  542310.7962850,  544881.3695520,  547153.4279590,  548409.7296180,  565154.8104860,  547199.4226910,  557457.7119340,  550905.0272770,  565328.7361240,  565490.4131580,  559692.6131150,  557902.1394660,  547288.7319490,  549668.0389650,  566238.9645730,  548353.6632530,  548500.2387230,  551845.0893110,  561263.7270280,  561374.6819990,  563843.1707310,  564733.6780430,  566932.7332810,  558168.5677850,  564245.1142330,  550352.7538730,  552733.6601650,  567257.0639190,  548950.4362810,  557116.9129750,  550005.1142330,  552988.9019190,  567157.7383470,  551581.4636590,  551750.4703200,  563043.2919220,  561950.8179370,  550124.3826700,  541764.1765040,  546838.8098760,  547927.3565630,  543234.2583900,  546119.9971160,  551370.8479830,  544528.7809000,  561613.4692850,  566357.0583870,  560167.7246940,  549840.8885920,  551943.4790130,  552685.6023290,  557807.7809000,  560013.2148620,  543031.8784610,  547938.0104080,  550775.6730890,  559376.5613880,  559691.6992670,  565568.8010340,  547509.7458120,  564239.2960520,  565003.4514880,  567287.6405490,  547420.0767580,  555492.7809000,  556483.6275900,  559608.4339610,  562854.7039770,  541922.2809000,  549857.4245060,  551454.4785740,  551787.3887430,  562526.2570900,  552886.8765520,  559723.0401590,  558224.8776740,  558922.6190100,  561008.3615450,  561435.4662930,  550837.6756370,  557793.6382600,  561099.0199240,  561552.7220760,  565228.8956540,  547568.4397240,  559854.3185340,  561060.3962850,  557910.7562690,  558527.8725030,  547722.6050610,  566912.4182730,  557012.5809000,  545852.3742010,  551611.7588010,  563175.3709620,  566192.7220760,  551381.4214530,  557674.4475670,  559636.2740510,  545639.9851550,  550945.8268020,  551432.0251750,  548322.8256760,  552452.1785610,  565353.8126460,  552032.0252730,  565624.6823080,  553014.9237570,  560234.1809000,  560916.0876430,  565100.0429090,  543584.8150590,  544947.0347860,  546112.9719110,  553217.5206770,  566254.6580930,  543740.9902020,  554935.1789580,  567456.9237570,  542947.3124320,  548499.1664800,  557915.3671070,  567585.1012880,  550037.0920110,  551292.4124790,  564216.5364560,  558067.3290170,  551605.1834970,  554834.6875670,  562633.2702620,  557637.9627180,  559840.3456060,  559285.7303580,  561170.3594120,  548033.4341070,  547971.6278950,  564022.8297690,  567549.8941080,  555191.5512350,  564832.4826540,  551899.8094710,  565207.1883070,  561299.4253440,  544151.6176350,  544363.3421900,  547477.5945650,  564927.6920110,  541698.0406940,  558386.5879180,  559395.3364560,  564973.9926650,  565953.1184390,  550189.5122430,  567489.3598470,  561463.9971160,  565512.2172640,  543446.1431050,  565150.7921360,  547670.0398530,  548470.4939430,  558065.6708680,  552988.7332810,  564370.3950730,  549182.8249250,  565295.5617220,  555064.4475670,  552104.8771100,  545530.4150460,  541624.0102910,  548126.8209000,  545090.1142330,  563006.2925280,  565611.6833390,  561560.6488250,  565216.5266630,  546224.2933180,  565917.3558130,  551673.3274730,  563106.2960520,  545697.6804430,  558924.4520410,  562612.4867820,  554661.3523290,  557842.9146580,  561093.7809000,  541737.9491240,  558568.5793930,  565084.9113350,  565781.3275670,  558744.6134790,  559107.4026050,  566853.6780430,  550296.0966890,  550726.4475670,  558004.8843480,  559785.3500320,  550597.6651980,  557968.9403200,  558991.1655150,  561441.5039770,  563006.0530890,  565210.2481900,  547905.4706690,  558055.0912450,  565467.0644820,  547190.7409000,  548291.5404630,  563902.4038510,  545015.6827400,  549246.2094710,  565008.1177420,  555558.0238910,  564223.9606750,  564892.5475340,  557878.3895960,  552692.2445870,  552526.3537640,  557692.4324150,  558903.9003030,  542847.9033880,  561297.0588870,  543115.4270540,  553135.5289920,  561426.7596230,  562873.4889610,  548641.9484580,  555315.3809000,  560826.4887650,  565699.7072800,  542554.3962850,  551457.4279590,  558795.5456060,  557823.6884140,  557917.2443150,  557972.4867820,  558672.9690190,  544760.0233240,  561822.4439140,  552430.8251230,  553021.7809000,  541687.2475670,  550383.7217870,  551952.2343410,  558781.9891320,  559406.1087690,  566950.9603870,  550726.3456060,  559512.1237570,  565812.5376570,  546247.7362070,  546727.5990820,  560824.6536270,  561172.7809000,  560175.2918170,  559689.6286690,  560402.7440950,  549021.8420000,  542227.4319670,  563147.2993280,  563058.5043040,  559936.3962850,  541287.5285510,  547584.6120690,  547090.5999480,  550390.1647380,  555438.2033840,  555641.4814990,  561362.3409000,  563212.9009000,  564477.3938030,  548818.0845650,  545032.3779150,  552880.5322810,  566807.7261050,  548918.8290590,  552198.2534540,  559422.8605460,  555004.6356010,  541363.9736710,  544872.1688420,  544998.7087350,  553481.3312880,  559188.9509000,  554756.2514880,  557780.3326240,  561958.6944800,  563877.8654070,  565660.1325660,  560183.5809000,  566884.4475670,  558796.5351860,  567246.1635980,  550998.7697220,  552562.4197060,  551214.9809000,  543127.7068260,  548428.4295490,  549968.4583190,  553040.2406700,  560100.5485770,  544127.6045470,  551735.8642330,  565118.4785740,  556652.8537300,  550859.4344430,  561572.3214410,  562870.8730990,  565054.2994190,  545157.1970490,  562430.7409000,  561842.9809000,  566998.5635090,  541079.4015190,  541464.9612280,  547190.1257280,  561226.1766220,  562612.0386030,  554621.1863050,  558831.1926650,  563739.7809000,  547570.8686190,  561814.8112030,  544279.6912640,  559953.6439140,  562249.5131520,  562774.7062730,  553123.0351370,  559185.6129610,  564317.7039770,  563099.3035340,  552383.0309000,  543008.3674100,  541206.0750180,  558202.9165970,  559478.7128900,  565937.6270540,  566339.1837170,  566905.6924040,  550083.6854030,  553177.6928500,  555308.8872830,  559920.9650300,  563881.9523290,  566801.5990820,  552814.3523290,  560210.1064810,  566058.0209000,  551270.3892150,  559025.6756370,  559996.5809000,  564708.7063900,  544509.9675670,  560033.3970620,  563571.0675940,  554762.0666140,  561523.6052900,  555349.5483420,  559401.4583190,  562016.7372850,  565756.7809000,  541351.4059000,  559557.6080600,  565440.2253440,  547536.0666140,  552714.3962850,  560332.3263550,  555211.6008180,  559828.9303250,  563375.8282370,  549412.5848330,  562994.1882390,  567063.7809000,  562620.7289520,  551345.7187880,  545236.3244540,  553317.9581150,  566059.6687500,  543737.0200090,  545416.2066700,  550436.0714030,  552791.8614370,  565006.0161940,  565334.2727030,  547144.6697890,  563127.8633740,  543039.7448640,  543602.8124790,  555558.0031220,  558875.1586780,  564432.1618520,  566550.9770720,  549841.5875990,  550806.6774520,  550856.7565100,  554801.4135530,  560557.8212670,  564282.7150690,  565859.5586780,  545974.5501310,  550505.7177420,  546694.5345230,  561333.8920110,  563261.5990820,  545993.9499820,  551646.2253440,  555423.7377730,  559487.3269990,  543205.3566580,  564588.1478720,  560689.9163580,  562796.0161940,  552378.0345720,  552314.1645730,  560910.4809000,  561142.1930210,  557543.7661400,  559797.8818350,  561930.9387950,  544683.1145790,  544448.7768840,  560294.1809000,  565813.9926650,  542008.5661760,  543846.3958250,  545204.7346370,  560529.4664350,  543365.6965330,  545900.4124790,  547434.7486420,  563513.4360720,  561466.6220210,  561771.4580550,  564274.8629550,  565228.2836320,  546199.5456060,  551554.0472440,  555872.9237570,  558283.2385270,  558509.6288530,  562656.9375270,  567038.1599850,  546642.4735830,  549310.4475670,  558713.2873940,  560968.5428050,  563804.5756880,  566884.0666140,  547294.2088070,  552547.5709710,  562867.9188310,  558824.4657250,  562778.0981410,  546414.1579880,  548891.6930490,  566010.8061100,  553514.9890580,  564788.3943350,  565106.9298360,  560802.9809000,  565904.8379960,  540952.7754160,  553065.7957150,  551088.9329000,  551836.3243940,  543375.8268770,  544722.8361760,  544807.1440840,  563394.0797510,  555561.6622190,  564138.8809000,  545518.7736360,  564226.4475670,  566416.9285790,  551247.5881290,  544335.9877970,  546038.6541390,  547652.5785540,  547864.5499760,  552374.5259980,  555470.5666140,  551159.4790130,  551421.2797510,  554648.5809000,  559280.4063550,  562103.0895420,  565190.6774520,  562236.0680190,  548188.5040640,  549752.0567620,  554856.8397240,  555743.4873220,  563938.9405640,  550986.3488010,  554883.2580450,  563958.8236350,  546527.4521330,  553695.9099320,  550419.9122430,  567115.3152920,  555962.4856620,  561571.1852940,  562273.0832260,  540862.0153830,  542040.4320430,  542000.7579990,  545958.7275810,  549111.8740780,  549436.0617890,  542360.3689860,  557290.5214860,  544044.9710730,  551699.2930950,  564428.9138480,  557038.7253070,  564114.4077660,  546064.6792960,  553425.3479100,  566810.1981660,  552541.8055910,  554598.8029440,  563526.1074310,  552899.6411620,  562321.8861630,  546283.1682870,  553893.6809000,  555004.3434490,  541355.9021120,  546147.6475670,  558020.3596970,  562045.3402220,  559018.5935320,  552459.4330740,  555377.5456060,  555817.7705370,  561781.6475670,  562630.4138110,  540936.3662660,  564456.5586780,  551996.3710640,  548435.4783790,  564681.4498980,  564896.2390500,  547093.1142330,  541093.8615450,  561377.7009000,  552265.0666140,  545624.4126340,  545078.5564100,  546724.2704100,  553251.0979730,  542908.7588640,  549596.3962850,  550026.0093820,  561012.9440210,  540892.3615450,  549558.7921360,  556257.5660240,  559507.0556660,  562395.8197350,  565395.3364560,  541243.1109000,  546953.0358020,  548576.3962850,  562608.6014130,  566381.3275670,  566551.7809000,  543347.7738700,  551250.5118240,  561840.2212670,  566938.6704520,  544486.7282680,  547033.6294500,  551269.4335950,  563297.2920110,  563451.0462060,  541058.8977830,  544329.3999480,  555305.4754240,  546157.4360720,  566689.5586780,  547692.7649260,  567002.8079270,  547810.9113350,  553518.7162610,  565285.6779670,  553631.9834320,  554449.2871760,  561860.1550010,  565963.3563190,  545842.9871870,  552159.0683200,  565661.5050380,  541192.8434000,  543098.8930280,  567254.9403200,  546336.1469130,  549576.5809000,  550369.8586250,  563014.5664560,  551633.8072160,  543003.6957940,  546226.1438890,  540945.5803580,  543219.3047100,  542339.6310170,  547334.6017090,  550821.5117530,  552741.4059000,  559422.6774520,  566797.2393840,  552625.4732080,  564745.6425350,  543753.2443150,  555529.7423330,  565286.6214800,  566450.1015110,  545387.4330740,  551380.7937760,  567081.5548130,  555402.1512700,  559387.7235930,  544394.0429690,  561336.7967730,  562467.9809000,  564052.9894110,  564988.1706440,  565115.6566760,  545355.4098500,  560110.1667490,  553494.0362190,  554332.4793130,  553239.8697890,  561267.5415840,  566236.2533410,  543772.0666140,  552236.4124790,  541292.2697890,  548650.5577600,  554124.7101930,  557704.2493680,  557924.3059000,  563626.3869610,  543374.2129000,  562547.9515160,  547397.0970290,  564855.9704730,  548010.2586780,  563949.9649490,  564839.1655150,  547676.4719990,  555167.3598470,  555841.8384080,  558765.9419740,  560885.0380430,  549585.7809000,  561856.9494390,  564092.3123690,  549865.5586780,  562906.5126070,  563195.7949350,  561506.9396980,  565456.6852480,  543630.0320210,  563242.4027490,  559053.8977720,  563348.7282680,  562246.8224650,  548133.3885560,  566504.8475670,  559824.6602460,  541488.2008480,  563423.2523710,  547833.2273290,  542162.7166800,  545739.9367440,  562693.6152950,  551760.6697890,  561792.0567620,  562963.8739230,  543326.3193620,  553366.5160780,  563208.3523290,  564907.2870730,  544911.9548130,  547555.4315020,  559588.7823640,  561624.9632900,  562783.3953580,  565609.3047100,  541088.3734930,  555366.7945990,  555567.1586780,  564114.6794510,  544804.0436740,  545053.5846270,  548558.6967110,  554559.9176520,  555887.5833690,  564629.5873520,  565372.7839210,  555463.5331120,  559444.6181090,  543209.1789580,  543955.0725110,  548426.4399260,  562472.7142330,  546099.1018300,  554570.4475670,  559053.9466030,  567276.3819360,  564530.4747780,  544694.5177420,  555604.9982910,  551853.4475670,  562115.6937330,  550999.7229290,  557312.8914650,  542359.2439870,  552766.8726030,  546355.9099320,  565336.2840450,  554094.8712010,  554727.2264450,  557479.1655150,  549731.1405290,  565190.4094710,  543761.6312400,  555893.0536270,  564250.1864940,  565260.7620320,  542521.2209000,  554636.0939430,  558016.0604700,  565139.4951860,  542624.8094710,  544391.5926650,  557106.6302150,  557641.4072740,  566410.1750610,  554263.2475670,  543108.8065410,  547973.1142330,  553155.2329550,  563022.7711910,  565439.3280700,  566157.0428050,  545095.6599500,  549987.4580000,  561442.0087480,  543317.5780010,  548064.0197060,  554458.9809000,  557733.3967940,  564973.1627180,  565623.6468610,  562875.4292520,  563097.7519140,  545963.3809000,  561586.5157390,  564375.5186050,  555411.0766750,  543857.5953330,  554846.0442450,  543460.4320630,  547630.0666140,  548274.3032530,  552650.7809000,  565568.1655150,  551005.2055580,  555335.8968420,  557841.3280070,  544894.6752090,  543380.1198830,  543524.9573710,  543556.0527450,  543968.4593450,  549181.8589290,  542539.9914260,  561556.6841260,  550256.9931290,  552164.5809000,  543291.5962850,  566539.4211120,  543728.3569000,  558890.6745170,  554888.1539390,  555189.9410360,  560341.3461170,  561859.7349230,  562529.8126460,  541303.3653160,  547042.4936340,  545611.8951860,  542664.8610160,  545343.6833390,  550326.1648540,  562236.0362190,  550654.5536270,  566224.0126600,  545116.1972570,  555161.6507220,  548509.6783360,  565128.2337300,  544610.4578230,  547742.7131380,  542620.6818010,  544489.3384220,  551195.4585560,  560340.8872830,  543796.5586780,  547204.8397240,  555490.0475670,  557578.1610650,  564776.6457650,  557436.1969000,  566269.8369750,  554303.2759690,  566451.9275960,  548092.8931630,  557677.0890760,  565312.6769000,  554457.7809000,  541075.2291760,  549697.9760220,  551542.5211250,  540770.0138870,  561899.4900680,  542609.2623810,  560555.6885920,  558967.7809000,  543561.6209000,  545525.3535500,  551315.2877490,  544683.3252040,  555904.1048070,  557142.6197000,  557476.8956540,  542477.7622080,  552443.0493820,  563524.2554760,  564777.5809000,  543659.0881630,  544781.3738200,  545246.0031220,  559059.2154550,  566502.9858690,  547667.5142330,  552661.8527160,  559323.1634500,  551411.8811790,  556823.1534490,  562338.1793670,  541631.8890080,  543507.0536270,  561592.8096440,  566010.9237570,  552463.1142330,  544672.4941310,  547413.2586900,  555707.2475670,  556380.2094710,  556536.2094710,  558732.7978490,  556884.9284410,  546790.0798280,  551733.7210200,  545953.2535730,  565884.2071300,  551991.3241480,  552737.2094710,  562904.1017150,  547778.7032740,  555296.1526950,  543214.0031220,  557410.6098860,  542079.9586780,  548123.7183110,  550078.3072160,  555849.7527310,  556499.7997620,  557666.1415560,  545260.5528300,  547891.6009690,  548255.3103120,  551829.3658060,  556671.1345800,  566624.4920110,  548105.5456060,  548632.4180680,  554162.6309000,  556590.6380430,  564831.6011250,  566671.2960520,  548513.2890970,  550636.4475670,  555454.3691350,  546360.7178370,  548419.4344430,  556010.2597730,  557941.0929000,  558002.6732080,  558059.9021120,  555881.4908240,  552939.5613090,  565848.4793130,  552741.9188310,  553886.5687790,  544744.3855510,  562757.5106300,  541336.1691350,  547400.8411410,  547316.2687050,  548456.8619810,  540961.1807250,  543428.8893340,  563604.4948780,  566366.3707310,  543176.2899910,  555380.3299200,  557390.0196270,  557040.0765520,  565644.6962610,  543509.4620590,  544510.1374890,  554107.0149430,  557241.5809000,  566628.0328690,  559688.6576120,  552815.6907590,  555050.9809000,  544535.0367140,  547452.7374220,  549150.1574280,  557587.2403590,  545281.8062160,  555244.4103420,  541094.9341850,  562283.3125530,  562979.9949850,  554683.8203090,  556714.8417700,  558363.7615880,  552269.4533740,  554549.1596230,  557864.7378380,  542484.9552770,  544338.9201410,  552436.6756370,  556819.5331120,  564797.8985470,  547150.4369000,  547499.2793710,  559747.3157840,  565160.8131580,  565246.1101380,  562763.3578230,  551073.3927520,  564930.6177790,  555411.6270540,  555708.1752660,  564072.1932710,  542902.9313420,  548187.8520110,  549047.9563050,  559953.4221080,  543363.8681270,  543513.3546700,  547739.7024690,  552046.7048330,  555889.6076720,  555986.9436910,  558082.9645730,  541132.9902020,  554712.9132080,  545663.2738580,  559000.8388370,  565543.9501520,  545424.8978810,  542470.7350780,  557803.8287090,  551779.8462590,  566490.4732080,  547933.1565610,  541683.4910450,  547992.7538730,  550472.1992910,  543603.6484500,  544783.1322510,  545073.7222330,  543343.0895420,  544614.2224580,  546220.1482470,  548734.3504360,  564035.9237570,  566668.7438630,  541776.6860580,  543742.7576440,  555771.6134580,  564368.1445360,  547149.1467540,  552377.5436120,  566343.7726180,  546602.0066340,  554165.7763180,  564619.5384760,  565702.6609000,  566278.3523290,  545286.9009000,  548089.8085500,  550827.6878770,  565950.6757950,  541910.0705550,  542977.2617510,  548646.3924700,  553958.7441700,  557558.2006530,  546556.5778920,  548256.1473120,  557684.9129750,  558867.9971160,  543275.5183520,  558698.2258880,  563790.8005940,  555897.1572440,  549500.2407170,  555304.7039770,  564822.1809000,  555120.8809000,  558910.9475670,  548860.2547290,  558987.7521230,  566650.4049000,  553210.1741450,  554116.4947330,  562279.6341110,  555523.7420650,  566110.4630960,  542536.2952820,  554933.6913480,  555470.2963640,  557602.0586780,  543227.0852480,  559290.8849460,  541621.5379090,  544792.8395150,  547024.2554760,  558798.9548130,  562201.9860280,  543633.5391420,  546402.0238910,  544572.1711440,  547207.8025800,  548350.4613120,  557612.3675670,  550245.0370980,  554807.3445360,  555085.8654070,  545284.0106870,  554530.7929480,  559779.7745910,  540727.0852480,  554827.7781730,  559558.7236310,  564185.2475670,  554455.7147840,  543752.0373100,  554377.8075670,  556842.4188310,  549905.9109160,  545050.5349980,  560016.0981240,  552353.9977670,  562837.7789970,  564812.3523290,  540591.3432100,  545031.5456060,  549371.0165690,  549553.5081730,  558195.7809000,  557734.7282680,  541830.3089000,  548596.2019530,  546808.3187150,  554749.3505200,  558013.7604220,  560489.3878570,  558151.1142330,  559767.4055910,  566252.3103120,  543406.6305730,  544347.9959540,  551352.3316540,  562626.0344210,  543749.3523290,  543817.6142330,  559023.0108470,  559450.8995440,  562729.2209000,  546752.2636590,  554981.8514880,  566985.1179140,  546685.5161940,  549735.4534150,  554887.2194960,  560235.2038830,  560349.1142330,  563935.1907360,  555942.1883070,  555765.0918240,  550976.4929420,  551806.5002350,  552687.2780430,  542611.8150880,  552507.7809000,  547797.6488470,  555280.7078990,  557524.9533140,  542807.4124790,  552781.8372990,  558208.4358710,  543079.2139710,  547058.1438890,  549706.8485690,  552993.5135940,  553757.1573600,  545197.3712610,  547142.9093050,  552581.5464450,  556075.8464740,  559499.4701230,  563391.1733050,  552429.4976760,  553453.8998800,  560355.5309000,  554713.2903340,  541702.8512360,  546561.1889000,  549121.4565320,  555459.3809000,  552627.4172640,  553165.5035280,  562505.6875940,  547281.7184000,  558767.4979920,  561816.6875670,  565304.7175790,  565656.6697890,  552710.3523290,  553294.7650270,  552117.5884800,  557835.1055750,  559227.9181550,  551509.6907710,  550754.1291940,  551348.4037070,  543484.6342330,  548361.8391520,  543754.3551570,  546883.7688150,  555963.4732080,  540718.1875390,  555255.7809000,  552068.1403200,  544211.0077910,  552838.4191980,  541143.1827690,  541713.6856620,  548638.7874360,  558635.1251620,  543894.8605460,  545959.4268200,  549595.1570470,  553359.2291760,  565653.3167650,  548099.3009000,  550536.5742880,  558796.0695600,  558960.0805250,  549831.6649580,  545889.4935680,  553456.0520860,  561746.5564100,  552531.7107250,  556492.1265790,  562008.6836240,  551098.7374220,  555730.3387230,  557187.9296600,  561922.2298800,  545572.7058250,  546108.7438630,  550511.0055020,  557033.0507410,  558741.9744480,  555047.2427830,  562659.3327670,  554801.5081730,  551201.7253440,  560885.8888240,  554421.7788980,  556969.5018300,  559755.5501310,  561859.1039770,  543072.4783360,  556073.2981410,  557607.7809000,  555299.4059000,  559647.3511480,  562452.4410940,  542771.5904240,  542968.4209000,  548097.6523290,  551780.5461170,  552115.3809000,  555730.6899910,  562887.0791460,  552213.6756370,  541213.7809000,  550256.3962850,  565996.8317470,  542756.2508140,  549376.7453090,  559479.8772860,  562615.7119340,  547854.4475670,  559958.4094710,  564484.2165440,  558614.2570900,  561775.2403900,  561803.2385270,  557081.5719450,  550393.6459310,  546773.9178860,  547949.7840010,  541643.7747930,  555964.5435460,  548747.2359900,  551941.7555840,  543161.6814520,  549995.6159520,  559807.7378890,  541683.8660060,  545959.6126150,  547137.0753980,  540482.7908010,  555318.9940150,  558738.5486730,  563202.2325130,  563269.4951860,  548714.9809000,  549593.6475670,  555185.9396300,  561193.6895290,  546735.3741200,  552820.9185150,  556007.9560820,  554940.3523290,  557060.6841260,  565753.1018300,  547343.6526950,  548640.0197060,  564265.1142330,  552546.4475670,  555147.7225060,  550913.0064730,  540969.8655660,  553158.9978310,  553261.6203160,  557385.6904570,  566332.6724770,  558348.0309000,  547586.7146570,  553980.2434850,  559664.1769400,  560352.6922920,  544727.4264700,  547841.9968620,  562106.6245020,  557797.0309000,  542571.4475670,  563301.0274120,  541615.8968420,  543363.6142330,  540558.0511700,  549733.9918700,  549943.9120480,  544684.1679970,  555544.9856560,  559461.7142330,  562779.0750180,  548735.1787490,  561096.9334420,  549182.6987740,  550144.0436740,  555640.4050130,  558004.8114680,  562790.3292870,  566005.0639190,  554228.1198830,  558993.6798900,  562091.7327070,  563514.0450510,  541765.5666140,  549857.0899910,  554977.3081730,  566283.8356950,  545672.3446010,  551923.2142330,  541014.9516320,  541649.1523290,  549360.8475670,  566797.3690860,  554392.9618950,  555372.6397960,  563696.9023950,  540626.5163840,  546336.9953850,  554304.1775940,  554920.8010340,  560227.8599510,  560500.4892890,  564144.9396740,  540641.4750180,  542498.7659750,  543321.9055610,  548520.1658620,  549148.6841260,  555598.4951860,  561602.8079270,  545713.0253440,  547050.2380430,  557700.8920110,  565577.0545320,  546680.4631340,  547030.5845410,  566158.0593810,  548273.8401260,  548400.6150230,  562526.1180820,  562357.1730570,  540909.6621790,  545895.4130840,  546533.3275670,  549468.6340860,  549648.4588660,  549992.7505970,  560903.3163840,  544315.5291520,  545255.6354450,  546168.2019530,  546799.4647910,  548163.2322720,  549883.1241840,  550872.4524090,  548949.3140910,  549094.5917110,  554256.6319640,  547845.3128150,  552036.8000080,  561676.4408330,  546658.1809000,  547438.8000570,  551638.8358220,  552519.4088070,  554824.0616020,  566207.4330740,  545983.3840330,  557284.2449880,  559577.2512200,  540817.6596880,  548570.5809000,  556448.1687270,  541894.0809000,  543057.3703040,  545958.2723290,  546302.2636590,  549639.6666140,  550228.2277660,  557349.1142330,  558945.7045640,  564627.5249000,  540471.4157550,  557462.5177420,  565811.5456060,  549232.5924940,  560220.4793130,  566116.6044290,  549409.0682560,  558168.3251180,  559769.1330130,  566786.8920110,  553390.1507110,  560032.3652180,  561997.2406160,  551863.3570590,  550390.7430620,  548757.5232310,  548261.0083370,  541052.9364560,  559291.3165640,  547767.8834640,  548945.4896380,  554908.1311300,  555892.9080410,  552903.4204690,  555286.8839300,  560542.9903640,  545762.4475670,  547361.8951860,  553729.7501310,  555428.7486420,  566270.8496830,  549335.0902530,  555177.1970490,  562971.0750180,  540997.4309000,  549249.1484210,  555073.8133320,  558658.0031220,  563242.6460080,  563314.9910910,  563985.0519280,  564651.0241430,  565759.4832260,  540613.5715460,  564287.7809000,  549039.6429690,  549159.2745710,  553335.8268770,  555365.9563390,  564477.4951860,  566848.1040200,  541092.4705550,  557738.5419620,  546270.3568160,  550156.7551390,  561926.7794270,  544063.8931960,  564165.7718470,  544097.7684780,  562256.7920520,  557850.8761380,  565916.5221350,  566505.3755840,  552690.7332810,  541198.6380430,  553694.9809000,  557080.8804790,  561943.5904240,  562059.2718090,  566731.9142330,  540834.9809000,  552404.5924940,  558993.9267330,  562331.0930020,  540898.7809000,  541305.6640060,  543521.0832260,  543761.5586780,  557889.9627180,  566900.3169820,  543666.9809000,  547592.8335320,  540960.9237570,  543610.7196760,  547255.9799050,  547646.9298360,  556658.4107900,  564731.0536270,  555394.0550120,  559813.8217160,  561306.9686810,  559015.3009000,  566242.3072160,  546731.1389250,  557061.7809000,  542205.6049070,  545742.3315220,  541517.5733530,  553103.6499540,  555108.9501310,  548859.2454670,  550459.6084250,  552092.7280620,  563646.8857950,  563215.3714510,  566046.3859670,  541990.8666140,  543838.3263550,  555680.5898890,  547186.6009370,  547456.1107970,  557787.2567620,  562001.2981410,  543952.0389650,  550043.7044670,  553944.1711440,  545581.2094710,  545684.1237570,  551148.4668210,  555242.7715540,  563585.1863050,  544356.0410630,  549519.7154340,  557357.7572910,  557686.9809000,  560688.0827870,  564441.8609000,  552196.2761380,  558138.3622950,  566391.0433110,  550587.7448640,  554391.5887600,  564719.6036850,  564944.5809000,  541397.2061870,  542692.6228520,  543608.4366380,  549155.3883270,  559306.7725530,  552342.2449000,  560545.6270540,  547593.9877970,  558045.9178860,  566516.2891350,  547962.5728460,  541499.9306330,  543526.4475670,  559214.9892330,  565820.3891950,  544599.3872390,  543805.2262780,  546207.3461170,  547717.4273770,  542100.2192560,  554041.4951860,  555327.5501310,  541173.1975670,  553820.9117270,  554245.3002800,  542808.7012540,  547122.6044290,  557579.9347460,  560690.8397240,  540912.8789390,  558612.9454570,  563777.5409000,  566540.2458320,  543714.6408030,  549445.4697890,  557654.7361240,  541698.4561000,  545609.4105300,  544268.1142330,  552263.0879120,  565472.0809000,  565675.3832390,  544954.2580570,  545836.7399640,  554128.0750180,  563551.4498660,  541825.4172640,  563446.4820760,  546334.7959750,  553727.9809000,  555475.2179370,  566228.5550940,  549753.9828800,  560532.6482140,  563547.0777450,  566781.9107700,  551826.3630780,  561810.4555990,  549927.1748390,  550405.2236020,  550194.8508430,  560017.0076820,  542239.9164930,  560508.6632530,  548491.3842060,  547391.4594710,  549894.7753750,  540641.3809000,  549508.5445360,  552491.8307750,  554702.8741440,  563725.8761380,  566113.8572360,  542002.9589820,  546045.4921860,  553494.2122730,  563832.5990820,  548313.6939430,  558356.0031220,  558458.0209000,  554408.0119470,  554754.8043740,  551621.6878770,  552369.1777250,  552839.5050380,  555056.7638350,  563305.5990820,  563500.9960900,  564933.5574040,  548974.6743240,  553740.0819750,  552638.1232420,  541531.1595410,  545686.7225340,  551883.1883070,  560812.7748390,  565748.9009000,  566251.8156830,  550013.4424380,  555683.4748890,  549783.1809000,  544193.4066830,  540751.5259200,  548382.6440580,  566077.0824870,  566758.0721620,  547120.9041090,  541697.5077720,  565476.6814240,  549426.7166800,  545376.7576440,  545882.9447420,  548698.5660850,  540508.8131580,  542035.0536270,  545657.1926650,  548091.4097660,  565244.0161940,  544949.9515920,  548559.3598470,  556936.1287260,  565071.1072160,  566550.9533140,  549027.1845360,  559498.3344350,  564190.1226370,  540852.9684000,  549251.5875160,  551701.7617310,  545719.0750180,  550708.4867820,  551909.4402890,  543796.2728790,  543969.4303850,  546608.9142330,  563939.4075670,  544222.4976240,  548478.7694060,  566800.3288450,  543539.8145130,  548218.5081730,  559329.4841260,  555022.8920110,  559420.8997810,  541231.1317770,  541598.6380430,  552222.4793130,  540566.4295490,  544113.5922210,  544409.3230690,  544686.2094710,  549058.1489000,  563630.8718090,  540367.6791740,  548242.1809000,  555787.1241840,  548968.3026390,  558506.4110370,  561556.9317270,  554996.4185810,  558245.5423730,  563233.1347460,  563623.6742330,  541480.3214410,  552910.2809000,  556494.7378110,  549732.5778780,  540792.1219850,  549350.1348090,  541893.2862760,  553059.4360720,  541347.8707100,  548385.2248020,  552394.7984440,  552968.9237570,  560636.5865540,  545689.6194090,  547693.2309880,  553875.1780490,  541326.4575920,  541845.0639190,  545321.8792610,  545902.4475670,  555945.9035130,  563428.0812000,  548026.4209000,  551733.9152870,  561662.8153830,  541177.7009000,  546825.4025880,  549063.2094710,  544456.4347460,  553516.8451200,  554874.8384140,  556154.4624870,  549585.0440580,  551850.2169900,  557843.8697890,  558598.8228160,  565516.8943020,  559622.9899630,  562927.1167490,  565419.9290480,  540449.5000980,  546434.0590730,  559875.1092360,  547278.0966890,  565277.1142330,  543750.2825290,  564829.2112530,  540253.5505970,  542447.9164930,  551352.2561480,  547441.3809000,  549842.0563490,  563891.2680790,  566535.5018300,  543693.0574960,  548194.2886260,  564038.8112030,  543555.0712230,  548988.4705550,  553048.3734930,  565814.8938590,  542765.1142330,  551748.5981040,  560010.4475670,  560976.8657160,  547836.6965630,  554393.9744480,  566386.9387950,  545200.6771660,  546464.3076490,  541526.2673860,  543238.3142330,  543599.0697890,  563272.4109720,  564845.9675670,  558896.0297890,  541414.5081730,  547484.5075980,  559557.0707550,  547946.9136430,  540444.0362190,  543798.2570900,  553245.2318800,  553519.8739230,  566088.2222790,  543342.2714660,  557972.4376160,  561891.9499140,  541017.4490700,  541516.6277160,  545098.3253740,  540712.5405440,  559425.4951860,  566480.4888650,  566580.0233240,  559461.0309000,  551575.1029340,  555650.2863510,  564278.8434000,  544613.4587760,  556306.0064640,  561599.6760970,  543225.2094710,  545962.3321530,  552394.1223630,  559120.7803640,  566627.5703740,  548645.4216130,  561353.9307710,  563572.9573710,  564710.2325130,  540170.4200750,  553164.2644160,  540970.3691350,  543727.7094710,  545447.9809000,  552916.9037070,  555892.5852090,  541405.5530520,  547600.8397240,  553053.7809000,  566224.9237570,  541931.5421810,  553251.5962850,  555141.3809000,  546400.9660850,  555280.2289000,  561508.7062730,  561841.2245090,  545554.2004120,  545797.2148620,  548992.9406630,  563341.9401920,  566552.0359240,  557994.1809000,  557835.2809000,  561703.7365790,  557761.8211680,  542328.9851870,  550116.7684310,  561642.9700890,  540229.5990820,  551314.3809000,  545452.5809000,  548779.5090550,  553026.3754950,  552632.7505970,  566137.2239380,  545298.1377080,  546945.1844090,  551250.1638790,  543854.6060750,  545163.5057280,  557727.6742330,  557894.7464170,  560815.2475670,  556266.4870310,  564165.0172640,  542053.4426210,  547651.9059000,  552284.8619810,  555876.1542330,  542756.2514880,  543482.8220990,  566407.5934000,  545374.8820240,  558141.6345590,  559443.2403590,  563176.5395210,  556783.2068350,  561318.6380430,  561101.7729000,  541071.2291760,  543792.4354450,  543688.7282680,  546586.7605310,  555804.3687140,  564161.1753950,  543925.2640460,  545581.4475670,  563831.9059000,  540952.2210290,  541921.4858180,  548604.8243780,  548868.5809000,  557948.9982910,  558947.2901940,  565962.7282680,  548006.6402620,  552224.3142330,  563620.2809000,  543553.2094710,  561300.0257980,  566413.2692720,  542145.0995810,  558830.1715430,  562710.0465290,  555353.3909630,  556053.4697890,  563524.8364560,  545987.4772700,  550739.5360020,  557700.1730570,  564246.2925280,  564565.1809000,  561385.4651110,  563052.1201860,  560788.6726200,  563291.5614910,  540873.5990820,  560035.9616910,  553357.8985470,  563460.4315670,  565941.8609000,  543794.4613120,  547843.6739480,  549584.5629970,  552339.4390200,  566127.5809000,  542507.8809000,  546400.6913480,  547759.7809000,  563926.2238530,  566545.3364560,  553078.9271450,  542607.2194960,  554004.4638270,  557789.3136100,  558723.4253440,  566637.1142330,  550937.0309000,  562761.4875670,  563410.5917110,  565279.4330740,  543858.8209000,  557721.2692720,  564483.7268460,  565256.0567620,  541190.7480570,  555502.8073060,  541300.2424380,  558038.1899910,  549199.5366250,  556979.9548130,  544381.8225670,  541975.6014130,  543302.2673860,  549418.7668150,  556840.8971790,  541092.3066140,  553363.8870950,  549558.1482470,  545115.4262030,  547953.2809000,  563633.3200500,  545841.5763850,  549399.4373420,  566053.5795580,  544117.2209000,  555790.5459090,  557057.8274120,  548775.9450030,  554309.4172640,  556653.1467540,  555492.8005080,  549958.2941740,  565967.4205400,  550735.3032880,  557852.3766450,  563256.6020920,  540744.6697890,  540785.6094710,  543175.2462470,  553247.9974820,  543319.9796580,  546889.4360720,  552296.5809000,  565748.8956540,  565857.2514880,  566531.0241430,  558852.2654610,  565385.6880730,  555607.1142330,  545962.0784780,  560970.3020270,  561312.2116690,  559959.5666140,  565538.0666140,  565603.4237570,  548218.5518500,  559839.9292220,  548672.7775330,  547440.8779250,  558203.6285950,  543142.3139190,  552216.3115120,  562728.6478950,  548730.5879180,  552644.2706960,  560625.9627180,  560668.9091050,  543568.3553310,  553044.7039770,  545612.9015900,  547700.4376160,  547886.3655150,  540430.5941880,  565738.7675670,  543921.6236790,  550801.0380430,  556188.3962850,  559666.4182630,  562621.0380430,  563052.1946930,  552426.1445360,  566466.5329000,  541230.3691350,  553244.1644620,  566175.3884470,  552860.1392250,  540617.5885340,  548087.1722040,  559741.8267020,  550214.2703260,  550559.5150190,  542340.2880570,  561477.1432190,  549969.5563570,  540303.7809000,  552746.4038510,  557274.5544420,  543535.3280700,  557344.5314720,  559744.7565100,  543739.0340970,  547155.2326770,  547602.0536270,  562683.9220760,  563660.5468570,  542917.8568490,  543407.6727920,  543968.4036540,  548030.1193620,  553123.6864120,  557563.9810890,  547895.4172640,  549941.4583190,  551210.6380430,  552149.9085600,  552382.1423460,  553352.2075670,  557267.7809000,  558239.4253440,  561824.5309000,  564478.3511130,  548413.5427590,  551069.3622950,  551138.2253440,  556940.3092020,  544524.0007830,  545338.8475670,  550317.8127910,  555736.6529380,  566556.7386460,  552276.9573710,  561620.3305490,  566334.3200680,  543535.4646940,  549953.9904240,  556189.0491930,  561549.5990820,  564284.9867210,  566370.3469380,  546475.3364560,  558166.2736540,  552866.2094710,  553358.9907770,  556972.3337460,  563165.6798900,  552869.1101680,  556946.7354450,  561389.8330740,  562200.2363930,  545464.5585300,  558398.5141360,  562746.5349980,  544508.8243780,  543041.9809000,  558855.2911040,  561865.2623810,  548638.7166800,  549781.8212860,  541952.9809000,  543135.3009000,  558384.5613880,  548388.0567620,  560316.9660850,  562732.1087690,  566015.8688120,  545762.5289920,  563838.7866800,  543918.4861020,  548960.9959670,  566446.9684000,  545291.7809000,  555447.2403590,  557659.2618160,  561171.5225020,  562264.4841970,  565787.2960520,  566541.6270540,  547657.6718090,  553743.1313270,  559669.4668500,  565169.8920110,  557126.9809000,  557938.4080190,  563697.2465490,  565621.9460380,  565924.1312060,  563971.8239110,  564042.5944590,  565942.9275670,  540153.3147610,  563222.6253440,  543364.7679130,  540561.4383590,  544302.6478530,  559415.4421020,  562070.7748150,  546793.0726430,  562590.0682900,  565267.7443700,  540148.2631700,  546457.7593950,  543529.8075670,  562722.6450980,  561859.2930950,  540398.4172640,  557228.2687050,  544031.1822610,  548219.7289520,  548877.3979210,  553690.5760810,  555322.9645730,  557932.4197210,  544228.3612460,  560152.3232730,  540314.8847250,  543219.5632130,  544270.2275020,  555379.3323020,  560083.6445360,  565834.8920110,  566260.6136650,  543439.4671750,  557572.7890300,  559905.0285060,  556157.7809000,  556507.0054370,  560451.9548130,  563030.7590020,  545195.0255630,  563077.0815130,  544612.6504650,  563972.2687050,  560173.9112810,  562946.6702910,  547307.3659040,  542678.9609550,  548061.9321610,  549963.2246090,  542269.6725780,  552026.0303890,  548016.9329000,  547694.2019530,  557320.5960660,  562048.8809000,  566047.1362110,  565882.1592780,  552293.9294710,  560605.0382870,  546398.0181880,  562483.2657480,  564894.1064810,  540557.6756370,  544121.4225190,  560083.5544850,  544722.9533140,  545725.7100290,  551434.3340910,  552060.3538000,  556713.7915950,  552969.3128150,  540970.2154000,  553665.2779760,  557633.5106300,  565648.8335320,  540559.3874570,  563442.6899910,  566294.2570900,  563723.2809000,  565737.8253440,  562932.8561690,  562971.9600040,  548257.5493210,  561889.3100750,  559169.1268310,  549061.3189360,  548102.4861020,  542795.5480960,  564068.4475670,  559082.0362190,  562636.2475670,  548864.4826540,  566196.4804520,  550640.0031220,  561233.5841790,  561460.5140190,  544723.7163840,  546588.9614890,  552893.3417310,  562705.0870220,  565619.0964200,  564839.3193620,  543869.8951860,  544879.3138480,  555997.9800340,  556704.6490450,  562337.6653440,  550864.5863740,  559616.5809000,  542260.0552680,  566501.9347460,  558341.6603210,  556948.8750310,  557775.4630190,  542498.0104080,  542995.1294610,  545459.1781600,  548628.6873040,  554807.6666140,  544391.5934000,  556703.3809000,  543507.2551860,  560851.6194910,  561601.6525580,  543382.2570900,  543658.5338410,  552222.6899910,  559504.1009000,  549028.6907710,  559608.0835000,  540352.1265790,  543278.2192560,  545763.5904240,  560073.6510300,  562110.4705550,  553618.7966070,  548415.3890920,  557071.9932890,  563781.0253440,  561295.9988340,  540701.3588820,  557266.3578230,  561023.1572920,  566349.1364560,  557116.3761380,  566251.5415840,  561809.1946210,  552527.9588330,  556127.2296390,  545285.2393560,  550392.2563520,  559875.8386850,  543434.7596230,  561570.6380430,  540374.0901780,  551159.6840040,  543981.6772530,  552313.8033720,  560156.2232530,  559627.4929000,  543383.6475670,  563308.4562250,  565977.5128590,  540182.8167000,  544906.9743830,  556528.2908600,  556644.2064320,  552078.6484800,  565086.2510200,  544111.6069870,  556777.4996990,  562723.4035420,  564912.5809000,  544329.8783480,  546998.9940150,  547243.6920110,  549737.4959760,  562351.5112370,  566120.2032600,  557388.8602650,  550994.0973980,  548481.3081730,  562047.4920460,  565161.9556570,  544218.1907770,  544560.3311650,  564273.3292870,  546067.8573330,  550744.0487060,  556352.2154400,  557496.9315850,  562931.2653440,  555435.0640540,  560412.3374220,  562925.6584510,  540366.1809000,  551414.0254610,  563574.7259550,  548147.9914260,  548385.6348680,  553514.5077820,  562245.7606980,  564137.7410140,  564795.6327520,  565072.5677850,  566014.4343650,  543412.4932290,  545757.0166720,  545698.5934680,  550010.0666140,  551189.4820490,  551163.4951860,  563424.8578230,  540788.0536270,  550023.5712930,  558311.8651110,  556411.4129470,  556408.9809000,  561780.1748390,  566415.9200300,  553185.4977950,  566074.6745170,  540053.4583190,  551852.4475670,  556622.6214800,  566241.8049960,  546387.9129060,  542562.4448920,  561376.8165160,  548318.9552770,  545971.5547290,  552501.0110430,  543019.1597820,  539967.4696870,  562146.8578230,  560042.1580430,  549070.5237570,  558277.2378540,  539965.7163840,  548435.7809000,  560541.3658060,  550529.7689240,  542755.3308470,  552239.6713110,  560882.1179790,  544115.7261050,  544602.7809000,  551781.3142330,  552646.6514880,  560669.7585950,  562754.6646210,  564869.8899910,  566130.4138110,  557402.2325130,  550035.3108670,  560126.2253440,  566404.8815710,  545299.4491930,  560825.1467540,  560932.9405090,  552849.2548970,  565372.4475670,  547596.4809860,  549882.3837710,  540568.2916530,  565154.0666140,  549334.3367910,  557161.3729400,  541756.3079270,  555004.1980780,  559854.2444760,  547071.4355760,  552880.5501310,  560708.1752660,  563634.5564100,  543544.4655420,  545000.2766260,  548627.6776300,  551597.0609000,  566256.6230050,  541053.7509300,  544694.3103120,  547845.8198520,  557508.1548380,  564233.8678570,  542525.4219260,  543362.0759820,  544103.4213490,  541419.2862000,  544189.6475670,  544843.3133680,  565051.7234840,  542051.3009000,  542870.2545840,  566346.0738940,  556912.5165320,  562520.6167210,  542663.7809000,  543985.5586780,  540315.9914260,  543132.4742330,  557275.7193620,  559594.9992910,  545376.2325130,  549534.8488610,  559332.4265140,  545887.8654070,  560379.2577390,  548159.9050180,  550142.4015900,  566314.3014480,  560801.7618520,  562558.3409000,  547210.7352570,  565260.6826340,  562221.2809000,  565686.9101520,  544628.5644050,  550269.2710960,  563178.6899910,  564791.1067430,  564895.0829130,  541531.7858540,  543115.5954700,  548113.4951860,  548363.8052900,  554852.9677130,  560909.1679970,  563450.7929070,  565308.9911560,  543818.5520710,  547962.0666140,  548175.1809000,  544451.5228350,  547950.1286120,  548510.8376690,  551400.1742010,  563243.3127910,  552165.0312240,  553205.3479600,  547701.4441860,  548657.6818900,  550237.4438210,  544066.3650390,  559400.4245780,  539886.1739130,  547519.1006280,  549688.7696640,  562641.8958430,  562681.4119680,  542677.9142330,  543222.4224090,  546040.1142330,  544748.2375710,  546429.8082970,  552671.8350760,  564552.9059000,  565323.6429690,  566161.4762640,  547926.6172640,  548721.6413650,  561526.6055450,  540739.2354450,  551725.2981410,  551723.9906650,  558248.3931450,  563203.4609000,  564725.2545840,  540812.1679970,  548900.5212040,  565428.6272770,  564180.4601450,  544129.4875670,  548455.9021120,  559203.1391420,  542919.6783360,  542071.0599700,  556924.9352620,  550402.1069870,  547543.3982910,  548356.3523290,  544403.8365350,  557355.1342620,  542132.5910270,  539993.2304410,  550525.0325410,  566214.7456060,  562434.0731820,  543278.0839300,  547381.3523290,  555833.3903670,  558757.8044290,  552564.9615170,  563115.3523290,  550268.2460160,  563750.1809000,  548195.7540540,  551622.7863050,  554794.6196100,  556815.6395960,  548088.6084860,  565606.8112030,  562183.0037570,  550114.9693060,  561412.8147460,  562809.6439140,  548339.8424380,  555642.9062640,  548275.1966300,  542978.5957150,  552392.2249760,  542721.3263550,  549521.0853300,  555483.5077060,  559672.1478720,  561882.4931940,  543767.1655150,  544581.1940740,  548709.9627180,  552667.6475670,  560692.5592780,  542327.9619340,  559779.1320590,  543089.6792050,  552118.6632530,  563497.2972400,  558044.1655150,  558652.4742330,  544015.5444470,  560268.3445360,  545044.3442800,  549084.5957150,  564383.5157070,  565191.8572360,  553645.9980430,  552211.4172640,  554402.6787790,  561814.2057700,  564828.1103120,  561475.6870030,  562377.9627180,  541199.6869280,  551447.5703740,  565422.2875670,  558838.0718760,  545274.4255280,  543953.4074560,  545012.5809000,  549609.1004880,  561038.8564560,  546966.9533140,  554970.3316250,  558574.3620320,  559573.5990820,  563151.0601790,  540281.0806620,  556816.5613880,  558030.9603870,  560504.2747270,  544130.9809000,  547309.6732510,  540892.0267100,  541309.1569000,  545149.4135530,  549246.4245550,  558717.8159880,  559751.6240370,  543136.0771960,  552503.3009000,  561651.1957470,  541171.3501310,  546556.7220760,  543808.5428050,  553435.8849190,  552645.2325130,  549277.8761380,  551250.2265330,  559271.1926650,  562045.2199930,  564640.2127840,  541419.5456060,  543291.3671070,  543635.3339930,  554386.6944800,  554776.6139340,  556398.6222790,  556896.5291010,  565901.4398470,  540677.4697890,  544294.9014670,  559662.5542330,  564078.6803710,  561604.9421900,  562542.1213260,  543276.3104400,  563050.8683200,  564107.0434480,  552456.8767900,  563771.4013380,  559823.9500590,  566121.9497310,  546556.8405030,  553609.9703740,  544445.1895960,  562951.4931300,  556096.2951860,  555278.6117850,  557281.9606750,  557678.9826740,  543403.1332810,  550788.5213960,  541178.3497070,  553372.8107100,  556721.3598470,  559946.0922600,  543654.6835550,  540884.4578230,  552404.3214410,  559811.0945090,  542823.1080030,  543072.5946930,  551305.7809000,  558291.3627060,  561794.0666140,  539900.7088280,  545325.4951860,  548309.5990820,  554899.7557430,  556359.7809000,  542431.8897440,  544571.7179080,  545970.3125460,  564053.2046290,  542419.0832610,  562491.0979730,  544567.0424380,  545673.4684780,  557096.2132430,  563807.8372020,  542631.2486100,  545432.3238860,  564777.0609000,  548412.3326240,  556093.8005680,  550893.0520370,  545018.6086230,  550260.1598470,  565167.2756370,  544980.6859220,  556342.3964880,  553232.3447770,  559463.6714610,  557190.8119560,  563941.3949350,  548346.1287260,  542386.8776740,  545254.6891350,  551193.7625510,  553546.4809000,  560143.9203610,  563714.5309000,  557425.2655340,  564939.0555110,  548616.9142020,  562866.3053440,  552469.0031220,  561961.4475670,  539732.3504360,  546975.8205040,  552747.8765940,  556179.4088070,  563183.6910120,  566039.6962440,  566174.8330330,  550581.1693300,  551067.1142330,  555926.9387950,  557331.5081730,  557546.6912690,  564666.5542330,  543520.1231460,  547912.7809000,  552337.4892330,  556268.8809000,  562665.8979480,  547889.8938490,  551104.9237570,  551469.8226910,  547401.7966480,  555620.1601800,  562177.8112950,  547519.7902680,  546749.0617280,  560698.5294080,  550139.1883070,  548507.6485840,  555238.7635590,  565312.2184000,  553135.8563720,  540544.9237570,  556957.6426510,  565725.1311410,  541596.9872490,  539705.3509930,  562750.3743070,  539921.5121590,  548008.9994430,  552236.4124790,  555871.6508190,  562481.1142330,  540132.8510880,  552337.7809000,  559692.3473490,  543938.2699620,  556910.1280070,  554403.2766980,  565725.5520440,  558114.8569230,  563325.4475670,  563476.7882860,  564709.4620590,  541739.5809000,  548140.4091720,  557891.1681500,  561450.2536270,  563122.4679230,  565388.0899510,  541886.2802050,  555801.5922210,  559351.8090690,  559584.2424380,  563183.6192840,  555946.4951860,  545579.5809000,  545690.2424380,  548902.0787720,  542830.3691350,  543406.8695080,  554708.0564560,  540461.9949170,  552994.2874700,  556618.5713360,  548964.7232820,  553240.2253440,  556793.3697500,  541484.8743260,  543814.2690890,  553334.7151810,  545952.3054900,  559109.6759520,  540152.3026390,  547838.6170200,  564685.1142330,  547525.9282680,  566201.2266830,  539955.5360020,  541867.6774520,  542235.0222790,  554360.7990820,  561939.2865180,  562394.0920110,  540964.1213260,  542933.8330740,  543626.0161940,  558453.8127910,  561583.1883070,  565370.7142330,  547586.1179790,  550213.7711910,  559358.0511700,  542279.1013630,  557488.2514880,  564124.8209000,  565283.6277090,  548081.9627180,  543091.5775100,  561179.2144610,  549928.3398270,  566155.7332810,  544072.4191980,  540175.6666140,  560021.9638650,  562422.7739070,  548401.6270540,  552853.0309000,  561770.6298210,  564927.4253440,  555487.9368890,  555641.1722040,  563350.5405900,  555201.4153090,  557446.4475670,  543006.8506670,  561870.6457650,  562590.8920110,  565071.2122730,  539690.3351170,  547975.1581460,  559272.2233780,  543991.7809000,  553009.1142330,  562921.3089900,  563500.0188600,  559198.7809000,  549362.1321780,  554989.6650170,  546576.6076090,  549666.2994190,  554090.6368020,  555861.5530520,  561505.1004880,  549730.3894590,  558807.9171620,  553784.3206170,  550455.0228700,  540642.9514070,  543459.1777250,  553392.6084860,  561409.5343250,  555664.7409000,  556488.9795060,  556202.9809000,  556917.4230050,  560697.3912900,  554647.6632530,  544146.2424380,  557077.8326010,  563816.4647310,  543329.6489200,  548275.7935980,  557229.7119340,  557952.1287260,  544226.1142330,  563207.0047810,  564254.9812770,  565381.3809000,  543985.3653160,  550663.0852480,  553492.6004720,  560855.1998360,  566066.1512700,  566114.7077290,  540775.4368140,  563393.8126460,  565943.7809000,  556338.6172640,  563608.9237570,  557442.2615200,  558935.6405490,  544845.7075060,  552556.2589390,  546243.0269360,  561358.9324150,  565592.9508600,  542173.4837710,  539719.4690090,  551442.3866140,  552144.9959050,  550797.7460280,  549303.5079340,  555972.7220760,  543032.9059000,  551163.2197730,  560498.6688670,  563512.8397240,  564188.0666140,  548313.6778070,  552559.5369980,  542907.2184000,  558197.9938440,  562935.4301030,  556600.1809000,  557921.6312400,  561575.5586780,  561658.2489850,  558990.7639510,  565785.6950100,  540889.3385920,  546854.5894110,  557170.8920110,  558663.5873520,  547876.4354450,  556885.6825390,  546325.7445360,  557006.2489850,  559053.8799100,  543868.7417940,  552794.2032110,  557561.3469280,  561842.5618520,  542686.8598720,  542936.3627180,  555606.6697890,  543656.4035420,  554982.6493860,  549600.8801370,  551155.0053900,  559467.7998570,  544306.0525810,  546942.5395210,  550079.3434000,  560259.2702620,  544211.5081730,  544557.8071470,  548426.6089250,  549487.8282370,  540296.9237570,  541355.0141440,  542075.0791460,  552188.7039770,  556778.9497310,  552384.8161940,  552886.9698400,  562386.2883630,  563491.2369000,  540936.6230050,  546433.0631300,  559627.1538730,  541284.3707990,  542730.8829410,  542262.2210110,  548291.3865340,  554861.2129990,  558606.2019530,  561556.1009000,  546074.8045970,  550735.6270540,  564460.3052450,  543274.1858080,  546524.7438630,  561676.8270540,  566024.9813110,  555822.5206260,  559236.1835850,  540024.7883070,  543835.3171320,  554614.2094710,  558159.4592920,  558664.3398520,  558940.1445360,  541408.3486420,  561164.7963800,  540624.4819950,  550617.8916750,  549425.9446430,  557414.0354450,  560439.9895960,  550195.1748390,  556064.0303800,  557674.5620160,  558262.2156830,  542515.0545200,  546363.1112170,  548060.8163220,  548997.9146910,  554783.3461170,  556347.6171570,  559216.9364560,  555576.4963470,  553299.0685710,  553309.1371230,  554681.5378060,  565321.5446800,  556035.1142330,  560069.0491930,  565620.1730570,  541763.3157840,  548271.2981410,  550766.9809000,  556739.6258610,  565577.2867820,  548048.0666140,  558913.0253440,  540723.7809000,  553634.7426020,  555876.3642330,  565997.8761380,  541110.5978010,  550841.9914260,  549679.9120480,  563771.6481570,  556932.3969160,  557955.7809000,  546508.7605810,  551353.4688290,  547365.2031570,  562978.3309000,  549885.0811750,  552804.4279590,  556882.4131580,  559571.9643860,  565849.2867820,  543924.5589820,  549499.9959540,  556621.3081730,  559007.4172640,  548180.8453260,  553772.3749590,  540054.4551860,  556321.1893510,  559150.0146660,  560609.5790650,  541962.0976420,  548853.2209000,  557219.6991220,  540933.9282680,  542655.6106870,  547742.5318290,  549734.3876420,  541594.9748550,  555529.0491930,  565755.5544850,  547255.9842900,  557453.0750180,  540826.6899910,  550347.7537300,  561724.0629510,  563597.8512520,  561882.4795300,  551811.0300670,  559415.0079530,  565402.8917010,  547931.8660060,  553694.7102680,  561526.0398530,  563227.6399970,  552809.6413650,  555488.9930210,  547671.9713760,  555932.0475670,  562179.7320000,  562956.8056930,  565516.0291760,  539458.9533140,  557038.0554100,  559077.6167660,  565107.3193620,  540415.1072160,  548453.8678570,  557491.6639410,  554392.8021770,  556577.8028780,  540346.8920110,  542398.5466140,  556301.1863050,  551510.0031220,  543157.0351370,  557101.0053900,  543342.9440360,  541336.0005800,  553558.0459600,  543979.8817400,  564352.1198830,  555020.8073840,  556786.4515590,  549421.2595450,  560511.4765160,  561359.2125940,  551065.8907900,  556624.8718090,  539509.0116690,  544513.0879020,  548066.9335200,  561565.1784900,  547746.3340910,  540405.1417250,  556015.1997030,  558146.3653160,  547050.3134880,  547840.6142330,  548354.7171360,  558998.8920110,  559185.5493210,  555053.6187380,  544975.9423580,  555556.6951860,  556311.2349430,  556128.5652140,  561854.2809000,  562522.0213650,  549166.8705340,  545627.9887260,  548686.0486000,  552235.9216870,  545251.1067430,  540871.5700370,  551840.2570540,  540531.3369020,  561459.3575740,  561020.8583410,  540072.4420570,  559617.7931700,  546563.0053010,  551501.1251620,  563782.1537810,  565975.7216410,  542453.2002550,  555408.4249680,  548049.1722040,  552384.6457650,  555969.5106300,  539960.4836030,  542657.9936660,  547546.1171830,  556989.7271690,  559994.7253440,  560257.7052990,  564273.1666490,  555796.4166240,  561635.5604280,  551305.4689730,  552109.8298980,  548135.3764060,  548333.4172640,  562639.3890630,  547849.1034810,  549696.1122610,  541058.4124790,  564567.6599930,  539477.1142330,  563144.1890630,  540156.3347460,  551102.8761380,  562081.7573710,  541960.3598470,  555723.3265340,  541735.8253440,  549305.4835240,  542986.1512700,  552147.0380430,  542663.0976260,  542947.1039770,  556559.5599480,  546793.5835070,  547667.7319200,  548602.0031220,  549780.4698950,  559059.4219260,  542007.2860550,  543212.2721280,  550190.0925520,  556550.3480640,  565344.7296870,  556842.1905390,  542281.8678570,  554402.7526360,  539663.1725960,  543349.0639190,  560401.4651110,  557564.2233780,  540430.3212510,  542808.7633560,  556798.8109120,  559939.7854060,  543459.9586780,  544998.5657100,  562842.1619670,  549506.0564560,  560620.7129390,  561011.9157310,  541171.1453860,  546464.1981340,  549920.6471420,  553373.1393580,  555549.5217640,  540793.5848220,  552618.1592780,  546918.3451860,  548656.6297060,  561148.4809000,  550082.8153830,  552565.1777250,  553020.8977160,  553206.6101680,  541758.2262440,  541851.1459790,  542857.1142330,  543053.8609000,  547908.7263550,  556599.3413400,  565876.5345230,  543016.2809000,  553000.3423040,  556686.5278880,  547372.6224840,  560978.7910690,  565094.8578230,  542015.1109150,  557159.6031220,  541289.0750180,  554365.7470020,  553456.1618520,  541013.7127640,  551170.4188930,  562697.4182060,  561372.0578730,  543516.9923290,  542365.5675670,  557942.0666140,  541812.5586780,  549251.1093670,  546831.5904240,  554053.3982120,  557425.6469710,  564583.2415740,  546372.8994680,  564995.2680790,  541915.5597940,  542200.3734930,  548393.5677020,  548455.4075670,  550504.9971160,  552526.8292970,  555457.0574960,  557162.0551470,  565205.5586780,  555606.6481570,  546893.1142330,  555239.7809000,  556265.7481130,  565901.3081730,  539547.5586780,  541433.0955290,  547159.0116690,  548511.0697890,  548645.2502880,  555763.0401590,  557312.1664420,  564322.2253440,  540593.2944140,  564491.4514880,  560392.3216730,  556069.0758640,  559734.4632530,  565439.6178520,  546707.7332810,  552962.6559000,  543286.9899630,  554629.1253790,  559654.4856620,  539479.0414040,  551368.6010890,  560436.7209150,  549831.3364560,  561660.5985800,  539658.4475670,  555336.8094710,  541251.5646840,  542295.5809000,  548582.4191980,  553321.2209000,  559883.1336850,  543561.8578230,  555661.1142330,  563893.7809000,  553428.4395350,  555887.6453070,  541073.4015900,  548328.5601210,  548771.3009000,  553268.3523290,  554316.3523290,  549368.1809000,  549619.7125240,  546781.4951860,  549988.0834210,  557010.9154030,  559399.5968680,  547139.9992510,  565854.9561580,  539606.5373770,  540432.8951860,  565135.2955070,  555983.7081730,  564526.2489850,  559800.1375880,  564663.9895960,  565299.7809000,  548171.0089700,  561070.5605610,  540868.2970290,  542347.6992670,  546351.4543690,  564855.8739230,  546513.0923750,  550638.6735910,  553314.8578230,  553388.2372760,  564937.2558200,  548007.7809000,  563995.8328480,  540537.3509930,  548766.2524450,  555029.3054280,  565330.9373630,  565633.5729000,  540264.2809000,  546017.6413650,  552909.9695790,  565839.1142330,  542009.6338410,  541359.1986900,  564110.9070710,  549051.1788170,  542122.1126540,  555629.8843480,  540007.9095330,  552542.8920110,  539769.9400700,  555348.7742770,  565422.5177420,  540087.1696640,  551135.9515670,  553089.5239170,  563342.4318660,  546680.4475670,  551940.8870600,  552102.6899910,  552791.1000490,  556857.4032780,  563119.9161110,  564511.4088070,  540411.0536270,  547554.7039770,  564298.1338410,  548133.2002550,  561440.6852480,  540752.1477720,  543709.0095370,  552375.9846350,  558561.6903650,  564989.3809000,  547083.8660060,  555763.8697890,  548082.0429690,  539831.8750180,  543191.8328480,  556303.6632530,  563893.9168220,  545859.0467230,  559869.5513920,  563334.7438630,  540271.9188310,  553133.2754050,  563049.9563390,  546766.9258280,  546478.1893880,  562250.9405900,  540920.2915380,  542470.2657480,  547286.6697890,  548370.7732660,  565775.9909060,  550943.6739160,  546033.3227990,  547150.2697890,  550582.5428050,  550784.6929520,  551456.4357840,  540885.8538930,  549913.9272410,  558986.8462470,  541934.2764220,  551030.4674670,  563300.2019530,  540350.6319640,  543357.1347460,  547529.3523290,  547889.8415060,  549601.3359350,  550265.1546370,  551069.7809000,  552103.0287630,  562457.5255810,  542799.1329380,  552905.4800150,  558331.3858380,  547654.2215780,  547827.4480000,  547705.0562620,  552999.7809000,  539599.1374680,  551742.9521100,  540563.4961540,  547980.1287260,  550825.5586780,  552703.1251620,  564916.1329000,  542229.6661460,  542512.6276150,  547793.0091160,  555503.5815640,  557236.4951860,  560981.1164780,  543048.2599420,  549824.3612490,  550330.5809000,  547182.0591150,  552857.3193620,  555002.9839300,  562750.5676670,  542881.1004880,  547363.8145130,  556338.3376010,  553937.3399620,  556215.5073960,  562931.8660060,  543192.6526950,  548040.2809000,  554175.2911040,  563061.9418200,  549125.1142330,  552910.9965860,  556557.1251620,  542402.1895020,  546379.4494080,  547648.2641210,  550632.9494390,  553090.1338410,  540565.1863050,  542885.6676920,  561223.9263550,  540997.4279590,  561800.5972270,  565732.6079040,  546930.3278390,  557515.4985030,  550132.2172640,  560835.7146020,  541778.0859850,  550820.8502070,  555202.7363140,  541573.4438210,  542673.6125740,  550243.2094710,  551677.1545500,  552528.8962180,  548640.9037070,  541251.0189950,  546699.9188310,  548867.5978010,  551244.8441910,  542300.4423170,  546422.4718090,  554457.0268020,  541673.6270540,  550570.9475670,  550698.9358300,  552735.6902480,  555805.7343880,  562885.6939430,  546950.4270540,  547385.4316940,  549902.7464170,  553444.9684000,  555736.1559000,  557717.9931910,  554405.1893510,  565824.3846740,  546796.4826540,  562517.5670640,  564345.4025220,  556240.5501310,  552106.5050730,  553282.8741110,  540447.3642330,  543033.9519040,  545531.2766980,  549576.2868290,  551453.7022970,  553772.5832690,  550794.1858080,  542327.0921580,  556357.3809000,  541545.7343880,  541883.6471610,  550606.9467770,  558049.4875530,  563081.3243780,  564828.5809000,  542134.6196100,  546010.1833770,  555475.1552590,  564964.4209000,  565106.7471920,  553893.9223140,  555693.1142330,  556477.6080600,  547489.2944140,  552946.8529000,  565158.6414340,  550316.4944140,  560996.0085420,  554293.2609000,  555825.5440810,  546091.9458480,  561322.4330740,  547772.0843480,  559691.6507870,  562840.2514880,  547217.1220310,  551627.9116190,  548734.8475670,  542407.5757720,  542030.5828320,  546269.8461010,  546458.5283750,  540828.9216680,  545218.0599360,  547555.9548130,  556923.3907710,  540605.4346100,  545468.5345230,  562470.9059000,  560059.7081730,  555514.3303510,  556483.4352210,  562238.6380430,  540049.9962850,  541860.4966890,  541363.0685710,  549997.9713760,  549979.4300230,  554398.0491930,  558067.5057680,  545315.5841790,  556848.4911800,  539860.6422140,  546619.7607660,  545068.0917810,  550470.9667410,  563111.0902530,  540815.6816750,  554226.6697890,  542162.9681510,  551950.9645730,  555227.5348540,  539551.8975460,  546056.7084360,  555049.4404740,  548033.3292870,  548699.4352210,  541542.5072680,  562916.7117180,  563238.5501310,  564010.2296370,  565387.6985950,  547532.4354450,  548532.1859630,  549241.1267460,  556946.0093120,  562969.4035420,  565816.7884190,  544672.6609000,  547966.7523290,  555707.1389250,  556300.6436450,  564179.5018300,  565444.8893340,  550221.3792770,  564252.0939430,  565453.4201840,  546745.9726810,  554896.2446680,  542559.4990210,  547407.8830280,  547782.8447300,  547572.7910010,  562867.2253440,  551207.7809000,  554712.8201750,  552033.6270540,  551791.8325130,  545970.0666140,  547635.0470500,  540963.6596880,  547657.7589220,  562515.3911560,  541743.3380960,  553211.4861630,  556772.3026390,  558803.4798250,  563135.6380430,  556991.0084860,  561181.1686550,  539322.6526950,  546581.6017960,  565373.4404740,  542486.1512700,  550153.7549260,  556598.8549740,  541866.6948070,  546887.1827690,  547107.6696820,  541226.4441120,  545654.3108570,  556128.8411410,  557095.1437320,  548970.7343050,  556522.9834640,  547797.6061430,  548648.5871020,  549575.8633740,  553564.5662040,  546199.1326020,  552698.0417700,  559949.9301540,  548012.3428830,  553733.5891190,  555111.3985470,  548312.0051820,  551867.7809000,  553219.6429690,  541482.9259380,  550767.4530310,  563126.6697890,  564190.4124790,  548798.7774160,  551777.9926650,  563065.0358020,  563764.0666140,  565586.8343350,  555053.5990820,  559999.3598470,  563142.1126540,  549787.6307750,  543434.6592070,  550522.7150320,  561650.1395850,  557821.4504540,  549121.9914260,  541632.8843480,  561017.1820300,  545846.3909390,  554854.7656720,  546139.4651110,  563308.4988490,  557454.8256760,  559967.9475670,  555400.7713760,  546996.0885920,  554315.8974050,  547128.3734930,  551798.8421240,  548017.2176350,  556381.3114470,  541738.8619810,  559900.1096670,  547889.0116690,  553985.0584670,  548954.0373100,  553230.7891640,  552608.0475670,  552716.3766450,  546698.6899910,  554514.2528100,  555617.4159360,  556225.5873520,  562967.7252480,  554899.4780280,  564081.4394370,  554399.5717500,  545956.3550630,  551464.5309000,  563152.2354450,  563571.9121850,  565665.7716830,  541820.3523290,  555246.2875670,  562844.9044960,  553119.4404740,  554675.0166470,  561055.4330740,  556533.6166490,  557528.6928170,  564829.1558490,  565431.1787490,  541335.4681960,  546057.1926650,  555755.4861630,  540573.5513920,  557628.2430310,  548398.0782260,  550778.9421900,  555315.8549090,  555961.5778380,  539330.2934440,  542750.3985830,  555139.1729000,  548891.9049310,  555096.3691350,  555309.0245970,  542608.7552590,  551624.4620880,  548760.2751790,  562771.2094710,  547742.9199130,  555282.8335320,  548554.0756370,  554344.1478720,  548031.8688120,  554892.2253440,  565110.4177480,  545758.4150460,  550005.8327660,  552645.8726430,  554258.4475670,  555748.3523290,  562900.5081730,  554540.3691350,  546171.8359960,  547041.7213260,  555913.2944140,  562707.6132350,  552735.8796650,  552653.7296180,  562774.9237570,  557229.3093550,  552890.2812760,  554039.1021120,  555048.9237570,  556240.7648570,  563442.4777550,  554800.4606390,  539359.7809000,  542086.5501310,  546394.0327520,  548344.4209000,  548682.4059000,  548242.3903420,  563614.7627180,  540754.3895960,  553136.7401330,  557058.9540840,  542948.5666140,  564909.5681340,  552300.7247200,  554709.5809000,  555968.8276290,  545733.1142330,  562762.1338410,  546330.5018300,  549787.8724030,  552992.0718090,  549377.9609720,  547448.5562850,  554139.1599610,  543802.5305890,  539192.3523290,  548616.5784080,  550051.7591210,  548562.2215780,  554507.1344350,  552147.1788170,  564277.2436830,  564755.0382620,  547819.9688190,  541700.3617220,  551659.2227600,  551702.0031220,  560939.7809000,  563926.5736030,  555224.3962850,  564047.1142330,  549897.7809000,  556463.9049310,  558943.4191610,  559037.8642330,  560760.3846740,  562239.6240370,  565602.2977540,  540791.4951860,  554253.2218220,  564586.6766750,  549735.9237570,  551392.8310930,  551878.4015900,  556799.2129690,  563150.5605610,  563558.9428050,  551618.7523290,  559169.5384760,  550213.1221230,  554428.4417700,  562132.5809000,  563936.3813420,  540259.8098800,  565556.5259460,  552832.9169950,  554994.6442090,  556123.9675130,  539775.9498060,  543599.9881540,  543796.0045020,  565239.4044290,  552286.9436910,  544291.9986160,  552926.9888210,  562986.7438630,  539385.3583650,  562253.4239720,  547720.2380430,  539224.1749890,  545619.1215590,  546012.9091050,  551838.4867820,  540902.1809000,  544042.2528100,  560756.7526510,  545965.2354450,  562060.8366620,  546162.9673410,  552220.4079270,  555928.2204600,  557493.3338410,  547818.7061080,  550470.9160350,  553089.9919550,  562804.8513230,  540515.8364560,  562659.8890080,  546906.7836400,  546588.3428830,  547329.0084130,  552180.6259700,  563949.3949350,  551662.1809000,  563011.2410490,  549963.6209000,  550726.9755310,  563349.7383470,  561814.2010680,  541749.6296390,  551105.4627180,  555783.0885920,  551787.5309000,  552482.4475670,  552085.5973710,  552644.9785050,  548045.6139240,  547684.0907590,  551124.4159410,  552887.3706440,  546125.7289520,  547030.5309000,  562230.7268820,  540583.3383470,  541184.7122430,  544866.9982910,  547124.7048600,  564003.1067430,  545701.0918240,  560572.3409000,  550951.0290930,  551551.2809000,  550790.9450790,  561976.8347920,  563403.2435870,  547270.0578230,  547344.6975670,  565420.6788590,  555041.1426020,  560064.0885920,  541120.8578230,  552442.0261830,  554256.4617510,  550265.6061430,  551091.7809000,  555393.9204350,  542284.2653290,  553466.0879010,  558577.4951860,  539492.2395670,  539974.5066530,  547545.5332810,  539636.4488610,  548503.0116690,  562957.4076940,  542443.3598470,  544848.0045840,  556949.2782260,  547119.6176350,  549516.9258810,  551695.1548130,  551934.4287870,  552014.0511700,  547489.3237570,  548094.9809000,  554902.0059000,  560553.7400840,  551059.2647710,  555370.0859850,  562585.6169660,  547887.9318430,  553034.0822700,  543090.5501310,  554978.9160350,  562280.9091050,  563322.4475670,  548906.5309000,  549159.0852480,  551400.7565100,  542662.2466530,  546253.0861630,  541901.7296180,  548972.5047100,  557655.1883070,  565035.2111500,  563907.1559000,  548020.0085420,  555814.5542330,  539167.4355310,  542555.0629510,  547049.6026820,  539463.4864210,  546575.3685290,  557912.7666820,  540705.7809000,  552603.9263550,  562439.7450260,  552239.7998570,  554737.1559000,  546680.6196100,  550982.5618520,  551181.4540300,  541339.8583190,  541669.8136870,  545827.6237730,  550898.3556130,  561065.0012390,  562378.1171830,  554184.9237570,  555452.6877540,  541026.0142620,  545677.9043570,  546264.4705550,  547340.1592780,  549322.9220040,  549504.7297750,  552015.4088070,  554497.7074580,  555246.9809000,  555611.6705550,  540775.9790420,  542451.3177420,  554545.9212510,  541927.6176350,  552344.0707550,  554231.0342330,  560433.6475670,  554164.0161940,  556592.8036270,  546765.6172870,  547375.6270540,  552053.9548130,  560376.4845540,  560572.2080840,  547431.3848600,  565411.5211600,  544123.8593310,  548043.4244640,  564243.1655150,  554802.1799550,  542834.4475670,  547781.7409470,  550528.2740260,  538969.6475670,  552039.2671390,  539667.9452840,  558558.5913090,  540049.1063900,  549899.9237570,  557294.5674170,  562325.7343880,  550533.5809000,  552497.5471340,  556727.7939510,  545311.6371870,  546481.9860280,  556663.3507920,  544597.8023610,  549092.2628180,  549177.0318090,  552183.4380430,  555857.0440580,  563638.7189530,  545177.9105930,  545563.7631220,  548973.5284730,  565025.1729160,  540443.1322510,  554653.8253440,  543001.0962580,  547140.6809000,  547748.8041560,  552340.4354450,  554183.7809000,  555485.2920110,  555641.5436120,  563750.7213760,  541686.9387950,  565267.4823930,  551585.5666140,  555254.2217950,  563016.0038760,  544368.8041560,  553009.1650640,  539126.7751200,  554955.5731080,  548759.2017140,  546237.9347460,  548409.8843480,  552570.7602100,  552802.3952790,  559690.5395210,  562689.7364560,  563880.8115750,  542221.0735430,  548051.5627180,  554660.3933400,  565031.8353220,  540537.6064030,  546857.2638270,  562592.6256200,  547224.7496500,  552626.5484680,  545137.8650320,  549065.9237570,  549179.4330740,  552216.4172640,  548436.7039770,  548594.0280910,  551457.5244900,  551908.6504650,  555294.8874990,  563846.1105700,  548030.4759350,  548213.6101010,  564861.1142330,  548480.1946930,  554714.1338410,  560727.1670390,  541208.6276150,  558824.7220760,  546142.8490820,  548671.1883070,  544362.6443440,  542602.3950220,  543875.0707330,  553306.2221610,  539963.2728170,  544202.1349230,  541702.6349250,  550749.6340650,  551717.0053900,  555601.6685400,  557619.2893750,  554984.4981410,  546282.3655150,  547377.8625330,  562508.2979070,  548371.0750180,  560915.6209000,  562394.4015900,  563105.2124790,  541470.7270080,  560518.2071300,  543667.2847760,  545605.8761380,  548270.9809000,  552073.2291760,  544430.8628670,  545519.1322510,  547449.3393420,  561277.7759430,  562931.6069870,  539945.4697890,  539467.3788900,  546949.6816090,  551801.4553190,  563765.4279590,  564653.1302980,  551334.0795430,  551444.7170700,  552640.9059000,  562320.5382960,  563034.1223630,  545800.5831280,  554283.3290170,  562232.9494390,  541668.4555990,  552384.9593230,  551947.0406200,  540988.4556380,  562767.9708110,  560731.9823390,  561634.6536270,  548748.0866320,  539658.3174850,  549981.8834640,  551614.1890630,  547787.3896820,  539127.9645730,  545653.6632530,  546956.0834210,  552411.8536270,  555804.6028180,  541499.8506440,  560626.6609000,  547996.5130770,  549152.6120690,  549794.4843480,  559754.8440970,  550066.5501310,  557804.7809000,  564907.4067990,  549228.3766450,  560731.5703740,  549446.0759820,  552882.5550940,  546403.1575230,  540375.0926870,  544265.0160480,  555112.1714970,  547690.5445360,  563238.2809000,  542291.9339910,  550370.2890500,  562719.6829410,  539648.9237570,  549037.0380430,  557155.0560680,  565134.5754210,  551192.0632530,  555838.0966890,  548182.9685920,  548777.7638060,  549288.1842610,  553839.6316460,  559562.9387950,  563345.5354270,  564567.4475670,  549513.4570550,  561599.3611470,  541797.0842710,  551289.4394370,  565392.8985470,  545909.4330740,  548510.0934000,  554223.3999480,  562663.2094710,  563070.7142330,  563694.2199240,  539777.4525420,  546267.5456060,  547501.1142330,  548638.8013080,  559975.2745710,  546336.4384340,  548413.0236670,  560044.0551560,  542881.4809000,  552647.1301060,  565248.4366380,  552396.2714660,  547742.7206590,  565061.3423580,  543696.0500790,  547315.6231650,  538912.5660850,  547105.2634170,  541960.2019530,  562173.3377860,  539809.4800150,  550918.7486420,  562034.0309000,  562238.2286610,  562436.9516320,  547984.8971790,  549698.2448380,  551000.8375040,  548949.1254850,  563706.2253440,  550669.5290480,  552087.0773820,  562414.4218270,  562527.5380430,  544059.2709850,  549976.7660630,  550832.3553420,  558055.3610100,  560902.0666140,  548710.5433310,  550334.0450510,  552223.4130840,  554916.0056190,  555875.7321200,  555953.6270540,  556082.2078660,  562263.4330740,  565384.7313950,  541937.8368800,  551297.8285190,  538945.2354450,  539056.5126830,  541890.7242960,  539349.1173820,  563761.1302980,  555083.9553970,  551883.8779350,  561146.9821200,  542732.6987850,  541699.5255810,  560193.2237150,  546302.1449450,  552465.1105400,  555872.1142330,  556905.6322800,  540459.5841790,  540875.1236230,  540939.2335320,  541483.9674280,  547248.3962850,  550085.9662040,  559628.9551140,  560086.0109880,  563130.5445360,  552237.2017960,  554873.4903020,  558292.4339610,  560934.2809000,  554560.1618520,  539103.7809000,  546898.7267480,  549078.5687790,  549844.8619810,  550580.6989330,  562485.7809000,  550688.3523290,  551728.0771960,  555259.4059000,  560531.8811790,  562231.5857780,  547012.6333590,  540849.2014610,  541739.5523290,  543876.3263550,  549851.4475670,  560561.0116690,  543931.1405990,  539388.9590820,  550438.8734370,  554553.8030610,  562116.8033220,  540419.9776210,  540664.2505020,  541072.1397790,  550618.5745510,  544546.2294190,  557512.8689000,  560339.5627180,  540489.2235230,  549252.5863610,  560040.8475670,  539568.4425540,  547659.3629900,  550236.9516320,  551631.5309000,  546776.4920110,  552111.6270540,  544735.2533740,  547540.6054610,  554991.6787720,  555423.1309000,  556809.9018300,  558073.7809000,  541987.3704370,  545462.0133550,  557593.1426020,  560315.1313270,  541764.3115120,  546992.2475670,  547232.5480230,  547724.8718090,  548228.7809000,  555182.1216410,  560828.0257980,  563768.3523290,  564521.1481730,  540298.6828610,  540959.9971160,  546429.0427900,  560361.1597820,  547182.6828610,  559858.2994190,  541563.0189950,  548475.0636920,  551804.6589490,  555688.3263550,  562295.1322510,  557877.8033720,  558189.5182740,  563148.0643650,  540719.3240240,  539225.6495130,  545973.2025080,  557139.6126690,  557863.7264160,  560033.2692720,  561436.5164280,  551350.1247260,  556146.9673410,  565257.8706440,  539637.8584970,  543382.1003620,  564359.2406820,  546129.1142330,  548478.1398740,  554083.6589490,  550972.7325730,  564201.0922090,  552017.8147980,  540392.2514880,  542175.9639660,  547429.6710100,  551987.3108760,  560173.2583770,  551524.0616020,  554919.3103120,  562717.6209000,  562956.3554550,  564384.8243780,  548055.8406010,  555991.2853250,  547057.5106300,  555377.0806200,  560798.6828610,  564395.5081730,  564490.0666140,  551747.8364560,  556317.4269230,  539462.8661390,  564743.3009000,  558073.0219500,  551311.4671750,  541702.9387950,  556886.6960050,  540504.3092020,  546887.6429690,  560732.7184000,  552575.4543690,  560035.3659620,  540394.9627180,  551445.4279590,  562723.7317770,  552395.1800030,  555035.0149430,  564231.0249940,  542421.1467540,  564651.1664800,  546688.8186670,  546822.3263550,  565000.6129000,  558006.2504650,  563447.7809000,  563600.5664710,  563617.8321820,  554817.6554390,  547493.0690360,  557246.9809000,  540192.1664420,  547368.6159730,  562013.4223340,  546502.5611690,  555296.4466260,  564977.2966890,  540310.4636310,  551928.8291760,  542508.1618520,  557263.6518680,  551296.4951860,  557307.1297370,  539364.2879420,  539950.4015900,  554796.6504650,  560764.4475670,  564797.0189950,  540011.2930950,  564890.6426890,  546863.7809000,  538767.8678570,  545955.3009000,  552172.0567620,  540488.9355390,  543344.8243780,  559657.8637400,  560277.5586780,  545551.8986110,  548653.0268020,  555780.9809000,  559764.5787860,  563240.0010830,  546029.8523290,  551976.6084860,  555002.3038110,  559743.2139710,  539395.2647710,  551367.8750180,  555048.7873520,  556186.0146660,  562873.4778700,  548737.6321400,  565225.6429690,  546376.5986780,  553630.2951860,  546309.1142330,  555613.0751610,  548667.3899230,  549070.6154120,  554367.6554980,  556953.5113080,  563368.9612280,  564602.3855510,  552107.4199420,  546087.9023950,  547863.5218330,  548322.3597240,  548825.6632530,  551966.6481570,  540253.7202940,  545171.2562310,  548551.5932170,  556738.7430900,  562260.0885920,  565000.0000780,  548974.1213260,  564896.0283230,  548865.5430150,  553177.9780830,  555521.3809000,  557258.4475670,  547977.6094710,  549059.3553680,  551355.9971160,  558445.9533140,  539759.2152430,  548105.7868000,  549337.7527310,  565013.9026390,  539547.8718090,  545735.9304330,  547907.0778700,  554656.2458300,  560859.6945690,  544582.1383280,  546010.3667590,  551801.9057000,  555656.7464170,  563133.7068260,  546826.1765040,  563546.9257280,  542287.0644820,  556815.1142330,  539063.5658060,  565180.2399160,  544688.1639480,  558291.0218370,  556530.9113350,  541422.9715610,  545006.7311260,  541141.4172640,  548577.5280260,  554951.8755750,  563002.9746980,  542553.0440580,  545625.1809000,  551811.4684000,  555071.2094710,  542356.7332810,  545481.9457520,  548514.8079270,  549670.1398740,  552418.4124790,  555487.6713110,  540923.5565290,  543846.9022870,  556132.4601450,  544719.1036510,  546495.9990820,  563690.4475670,  548398.6005720,  556081.5586780,  549523.2660490,  555699.0666140,  562185.1467540,  562260.1265790,  562212.7601530,  544027.4500730,  546668.9955600,  553505.2272280,  563889.4011530,  544264.1428910,  548957.1655150,  549332.1635090,  563507.2556470,  552117.5809000,  557082.1918590,  561389.1172130,  540970.5782860,  545984.6636590,  555904.6155060,  560070.8121110,  541959.4316280,  560630.2577680,  538690.5463320,  544378.3691350,  547251.8593310,  547387.9237570,  549787.8486970,  548342.5605610,  546734.4557470,  556382.9387950,  554901.7809000,  560452.1009000,  546172.5924940,  560141.6365700,  552197.5624130,  553827.9262790,  565206.5809000,  550032.2694500,  558110.3382770,  559934.9603870,  547514.5324920,  540746.8421960,  557364.1467540,  551587.2287110,  547193.5893290,  564406.3329530,  548752.7768400,  548249.1863050,  543336.5081730,  549845.4981770,  545912.3042640,  541430.8038010,  557225.2640460,  563512.0475670,  544680.9355390,  549462.5822940,  543019.8951860,  546545.7379820,  552094.0134580,  543958.9160350,  549222.7303950,  553501.2129990,  557681.4553190,  563343.1080030,  563575.3445360,  541852.9237570,  544601.7809000,  546329.6809000,  547027.0381090,  555487.0486970,  562831.7327070,  548062.5341470,  554035.7315170,  556168.1213260,  560441.9650800,  562909.8082970,  563117.2209000,  565110.6718090,  539138.5074920,  550177.4135530,  557926.6841260,  564878.6488250,  539686.2286610,  544230.6101680,  549504.4031220,  555785.5493210,  558057.2192360,  547111.3884470,  552381.8393590,  555924.9783520,  560682.8209000,  548365.5220760,  558294.6242730,  551382.9767760,  545153.9483210,  557656.2633240,  558207.4023510,  549096.2946610,  556094.1809000,  556397.4964360,  564253.8427560,  541706.1689600,  562736.0046760,  539773.6623130,  551905.6435870,  553607.0031220,  538927.8795030,  546130.8867820,  557315.1459790,  542863.2103210,  546035.5192180,  556229.6676920,  540324.7611820,  542331.0580080,  545907.7809000,  550267.0921580,  557431.5833690,  560043.1579490,  543279.0666140,  543960.2915380,  552118.3364560,  553199.9890780,  547003.6112030,  560772.0161940,  564818.8934400,  546251.8549740,  561342.8872830,  549070.3950730,  544612.0599700,  552245.2475670,  549449.1441290,  539690.0599700,  552916.4628340,  546420.2687050,  558150.3174850,  558082.7997680,  548200.7887740,  558520.3340600,  560633.4194540,  542082.9653660,  553193.1368320,  555686.4732080,  562789.1456060,  542665.0993630,  556010.0580540,  551550.9041880,  560376.7672010,  560520.5917110,  564336.1501310,  541821.2354450,  549676.6044290,  552767.5517330,  557514.8447300,  561139.5627180,  542803.1983760,  561264.5910270,  560694.1643200,  547023.6092260,  546746.3908290,  550195.9311330,  561768.5934620,  551187.3601990,  549034.6155460,  552000.5081730,  562157.4787420,  561565.6094710,  557168.2432570,  560212.3271880,  544136.3680560,  549534.2886720,  562717.5681340,  540483.6906740,  545807.3685290,  558145.9070260,  543661.9149430,  545303.5050380,  553064.4765520,  555812.8281100,  563076.3809000,  563938.6314750,  545992.9037070,  547145.1722040,  559949.1142330,  562087.6975670,  546857.1697890,  547763.4910450,  552112.5041880,  543350.0939990,  556005.0943330,  549623.4521330,  562792.1679970,  549539.3157840,  539333.0101680,  563149.8761380,  546677.3246260,  542594.6314750,  554694.7557080,  540795.2582330,  545848.6922920,  549117.5610050,  564025.1315490,  544327.6968370,  548024.6801970,  557441.9611200,  558043.3280700,  560214.7217980,  560369.8786780,  563865.3809000,  546039.1575230,  544016.3465570,  547903.2702620,  555554.5856810,  556283.8429160,  558273.9192650,  560505.1919610,  561818.6967880,  546182.2809000,  555230.4059000,  559158.5346690,  563192.5081730,  563641.1627180,  564470.0885920,  547425.0682560,  554503.2632530,  557694.6589490,  549980.1052240,  548350.4124790,  560602.7908010,  564240.2589540,  555207.1833390,  557578.9809000,  558433.5092950,  559460.3270640,  549803.4237570,  541367.6246500,  549511.3436530,  551016.9696970,  545732.7144070,  539219.6701680,  552135.1190290,  539504.7384760,  563151.7809000,  549339.7809000,  543777.6110450,  545298.2570900,  548919.2222700,  551443.1682870,  546092.8920110,  546974.2286610,  548149.4557770,  550760.7489970,  563284.4638270,  557642.8079270,  565141.2467390,  539342.1338410,  540981.8454160,  543559.0927280,  547655.7809000,  548041.7348170,  563577.0712230,  544651.0824870,  560665.7177420,  549956.9264400,  552134.9907770,  555682.1338410,  555930.3787490,  547576.4649780,  541749.5911640,  560397.7364560,  541022.9994790,  546323.6278220,  551337.9818570,  543273.5534950,  554555.8645450,  543470.3981840,  547844.6237090,  558168.8168710,  561204.3523290,  539978.6084860,  547402.6248900,  545473.3216230,  557580.3282680,  550706.6745170,  563642.6856620,  540879.4510030,  550391.5675670,  538764.3523290,  542307.6992670,  549703.0189950,  554123.1021120,  541240.2465080,  539927.5384760,  541131.0116690,  545946.4927640,  539402.6044290,  542597.8240650,  547585.5343250,  555602.4765520,  556878.2466530,  550253.1940740,  539517.4475670,  556949.0172640,  546926.3345720,  554865.9936660,  548974.3523290,  553044.9355390,  563438.2424380,  543411.1883070,  551852.3494070,  564765.1158000,  548134.2071300,  550607.2872830,  564138.9457350,  545469.9124790,  541397.8627710,  540534.6984110,  548056.1842610,  557811.5409720,  544714.9053640,  549417.4575470,  558124.2951860,  548375.8970830,  554415.7809000,  554935.0380430,  543988.9258450,  539608.3103120,  543697.4951860,  545242.7347460,  550954.8329230,  561096.7809000,  538790.0191670,  544149.4172640,  546206.3414540,  547353.7009000,  548887.5904240,  542605.1883070,  543168.1341010,  544214.6661460,  550764.3204350,  547615.4221560,  556106.1458640,  562683.4732080,  563292.2019530,  540834.8966890,  542879.9825810,  557947.2217600,  562019.3629900,  564233.4565760,  555057.2881460,  544577.1837440,  551052.6142330,  538872.5289520,  561017.8159880,  558331.9443880,  548670.0355860,  545747.4300230,  563864.2097350,  545979.4655470,  539185.4389310,  540211.7809000,  558007.4093150,  538774.9387950,  539288.6926650,  544655.0390510,  546045.1142330,  547345.1409000,  554914.4475670,  556232.8621600,  541574.8458350,  543687.1635770,  547727.5309000,  548884.0161940,  547415.8293850,  542591.9059000,  550264.2809000,  552219.1095710,  561929.6475670,  539270.0771960,  539881.8609000,  546165.3809000,  564349.2330550,  555191.3139740,  539596.8294440,  546272.2809000,  554708.6951860,  545901.4820490,  547241.3983860,  545115.2718090,  563043.2504340,  551546.0612450,  545004.5060660,  550072.7037270,  563626.3783030,  561488.6164950,  554404.6551030,  561524.5250860,  549422.8990100,  558239.4209000,  560176.0827870,  555628.8456480,  546600.1311700,  547620.9573710,  547904.7961280,  561465.1142330,  561704.5769200,  557665.4615720,  544261.7809000,  544536.1679970,  547303.9971160,  555694.7220760,  564317.6899910,  552352.7142330,  544128.0353170,  550156.4867820,  554777.7705370,  555537.1467540,  561234.8354450,  563430.0666140,  564384.5736930,  540374.6646210,  544116.2156830,  552473.6356490,  554240.1074310,  552937.6689480,  538480.1142330,  557847.9149780,  561967.3741200,  542570.5715980,  561174.8447300,  541900.6041660,  548063.0361550,  540889.0769890,  542731.8175970,  539588.2879420,  541864.8049690,  552344.8555270,  550762.2470650,  551142.5464790,  544350.3626170,  550257.1559000,  551018.0431950,  556403.9627180,  557847.7809000,  564377.4951860,  543574.6573810,  563692.9180770,  564304.0885920,  540077.9204350,  559801.7268460,  542542.0839300,  542602.0525050,  555316.6073460,  560378.8001840,  538819.2369000,  547172.7464170,  540015.0885920,  547934.0978400,  540510.0501310,  549884.5246190,  550503.1586780,  540643.5232310,  557712.4681620,  551021.4298800,  562665.6939430,  547462.8894710,  542214.4110370,  542477.2981410,  539372.3260060,  557630.3345720,  563980.3573190,  548138.9181550,  558580.2846040,  564126.6706960,  550037.7253440,  561949.6367790,  561879.6742330,  540214.4297460,  546067.8761380,  553805.0053900,  557494.1498320,  559579.5018300,  554649.0666140,  563526.3396040,  547655.0964080,  540381.4330740,  545793.5106300,  547351.1655150,  542593.2809000,  548535.6089210,  551353.6347210,  549179.1142330,  562390.9878010,  541361.8089860,  547559.8802790,  559887.9920440,  542060.2002550,  550155.3144690,  542821.3912900,  540318.6899910,  553832.0744780,  557489.9430620,  564243.3272920,  545613.0666140,  548497.3933030,  554962.2430440,  549549.0478040,  558127.8087260,  563426.4574800,  542965.0740730,  543238.1257280,  547441.7253440,  548345.5873520,  551811.7174080,  560049.8985470,  541831.6453070,  542595.4330740,  538680.0062520,  543459.0738030,  551345.5436120,  542370.2843010,  554159.0883490,  540473.3162540,  547700.6951860,  549680.5019760,  563382.3036270,  541667.9629110,  552072.2544730,  564676.1496150,  553172.9492170,  547176.6553190,  559140.1946930,  555545.0899910,  539734.9013190,  564633.0832260,  541244.4509510,  549209.4511680,  543097.1722040,  557489.1854800,  543873.3169000,  548214.3514330,  541908.9195860,  561271.5432760,  562282.1319200,  564583.7809000,  542614.4694250,  552989.9563390,  555722.6233910,  563085.2120930,  553343.1204430,  559978.5335880,  563857.2220760,  563739.3539860,  542694.4597990,  561356.5242630,  542165.5182740,  552582.5649870,  564449.4282760,  542373.6019120,  550866.1067790,  558117.8410770,  549783.0042010,  554060.4974880,  554639.0702400,  559288.3609600,  541088.4019050,  545338.2570900,  548526.4278800,  543246.9275670,  559342.8267720,  545473.4875670,  545631.9564490,  551394.3142330,  553849.1686550,  542016.1605610,  553680.7345420,  561000.4193460,  541404.8718090,  543708.6504650,  541348.9023950,  546231.1044290,  545246.5957150,  538844.1582580,  556249.7431640,  541719.8784610,  547455.8804850,  562532.6584510,  542543.6929880,  549828.9700890,  563256.1809000,  538939.3677170,  550060.6067060,  558032.2172640,  539431.7923290,  542352.8818170,  542485.4721750,  558564.5877090,  561998.3100010,  542770.3162850,  546314.9951860,  543543.8593310,  553579.1543940,  564463.9971160,  557432.7188310,  542055.1787490,  560007.4172640,  562899.3222330,  563278.6751850,  547283.3523290,  564859.7193620,  546641.8386970,  539585.5908550,  563469.3292870,  540852.9387950,  546204.4038510,  543656.3569000,  538479.6486690,  543112.4817260,  552229.2069870,  538774.4943940,  540669.4613730,  546471.1409000,  538619.9029040,  540691.2627940,  547033.9726810,  538602.6222100,  564146.6809000,  542273.1142330,  547762.0178670,  554002.4395100,  557646.7953930,  541626.4969040,  542058.5489610,  545965.1422000,  553545.1854800,  541891.8721050,  553771.6209000,  553831.1778850,  543207.9164930,  540164.4209000,  549472.9413100,  552267.1493210,  560477.1788240,  542144.7247200,  564056.7926430,  547401.2031220,  553210.3655150,  538406.7556050,  540022.5966890,  546375.0536270,  547688.0700570,  554118.5445360,  563680.4735410,  543452.8776740,  546216.9684000,  542427.3839530,  559365.3809000,  561714.0354450,  559245.2859300,  563545.9207180,  547458.4851250,  553484.0966890,  555409.0440580,  551874.4968530,  541221.2727170,  548396.5872750,  551439.7809000,  538590.5894110,  543694.5070150,  551682.3819930,  554696.2192560,  538539.4172640,  550520.9573710,  552849.0774520,  561949.4951860,  564210.8872830,  547806.7945990,  548738.9653660,  552345.8201160,  542904.3667420,  543108.4617510,  552527.8897440,  540246.0489410,  542802.8045220,  545413.7009000,  564592.3627180,  543984.2192560,  545948.4951860,  559303.4404740,  562025.1315490,  540742.8397240,  547961.6724050,  557333.1493210,  563357.7068260,  543238.1687330,  553508.5625090,  561220.3214410,  548673.7296180,  564861.3718090,  546246.8730990,  546623.3088500,  562957.4732080,  563792.2273290,  552295.9021120,  542987.5561810,  560305.7632970,  538512.5428050,  543788.1342570,  554956.6845140,  559943.2563100,  546488.4226110,  558421.6193400,  538689.2060010,  539417.0222790,  542868.8407290,  542917.7689240,  554713.5200300,  562378.2977540,  545535.8904890,  543735.6631570,  547390.0248020,  553166.3895960,  555897.2978080,  559968.4638270,  563287.2745710,  564516.3445360,  539759.6475670,  540280.3864440,  547275.0191930,  561633.0985470,  563021.6792050,  562131.4893110,  562741.6889160,  542612.9077240,  552756.1308140,  554882.0127840,  554946.2437510,  555610.6142330,  561537.9074820,  564667.6250560,  540569.1844090,  547553.6856620,  547830.3825260,  559176.8005080,  562664.7872690,  559001.6321400,  559905.3809000,  563549.0253440,  544949.4626080,  555223.6739960,  555663.2253440,  542345.8801910,  558915.8315330,  539544.9491890,  564331.2711330,  553746.9406480,  563246.1081730,  550138.7424000,  551807.1978100,  550489.8707880,  561464.9116850,  562789.4475670,  544479.7809000,  539488.6697890,  540772.5859310,  547430.3174850,  547939.4634400,  545860.3777250,  553550.2176820,  559457.1722560,  540830.2714660,  549229.2443150,  550303.1707310,  553952.2555950,  559558.0394030,  560060.9119340,  560582.0248020,  560696.7975670,  538973.6939430,  539113.3949350,  550239.8861630,  564457.7163840,  546947.1871110,  549172.8005080,  555321.8371250,  563471.4444510,  559324.5510860,  555528.4963470,  559678.5573710,  553410.2852480,  554776.8198610,  555152.0031220,  561206.7039770,  564809.4689730,  563191.7120830,  551353.8920110,  558627.5142330,  561238.0285190,  558683.4823930,  559282.4851250,  562180.6142330,  548333.6598350,  543377.6425350,  549981.6662500,  541453.0712230,  539930.9077120,  542111.8863950,  545078.4638270,  549754.5900600,  561921.8801910,  545454.7655150,  550172.0536270,  559763.0031220,  560325.8914530,  543172.6401590,  543292.9237570,  540427.6845140,  557291.3774420,  558432.1257280,  559834.1089420,  563555.6559000,  539047.5990820,  542292.8495130,  560106.8245590,  562338.8362310,  562691.1735700,  563612.2570900,  545581.6338410,  552546.2374430,  555516.3142330,  553491.3501310,  555057.3965350,  547165.9953930,  548093.3012920,  562427.0666140,  541322.0783360,  549576.4555990,  540668.5395210,  543084.6252500,  549147.3598470,  555675.0604030,  541820.9671510,  545307.3661440,  553061.8341020,  559074.3571710,  561013.7809000,  541974.0189950,  553479.7809000,  546640.3083730,  546957.5895960,  557433.3752560,  564427.1016550,  538342.0031220,  545691.5053810,  547970.7604920,  552191.1655150,  552496.7685540,  561198.2383670,  545171.8834640,  546792.6760050,  550161.5369980,  556517.0293080,  558936.5480230,  559649.6427180,  546583.7809000,  560838.8350870,  562236.8366620,  563053.2944140,  557445.9611580,  558277.6874420,  546152.1321200,  554826.8713110,  561252.1333900,  562631.6984260,  540372.7620320,  550984.2265230,  544608.2732080,  547760.3376320,  559207.7809000,  564349.5092950,  550868.1745550,  539355.7500120,  564260.5169000,  542031.9586780,  550330.5772530,  542084.3072160,  563389.8044290,  545734.7296180,  549141.9748780,  550155.8302830,  564151.8499650,  543245.5220760,  545808.1249860,  549862.7984440,  561682.1717050,  538267.6209000,  549277.6441480,  559874.9520710,  561422.3351170,  553944.3962850,  557772.2047410,  563254.2783620,  540002.2253440,  551302.0475670,  563003.2647710,  564547.4642130,  547473.8481430,  562410.9283410,  563422.5932980,  548026.7948530,  551439.5895120,  563436.7332810,  564734.8974640,  541011.0981610,  541530.3595160,  549859.1682870,  547894.4351060,  550306.3376010,  563280.9951860,  549667.0141970,  550052.5570190,  542880.3008690,  546150.0986570,  552478.6954730,  555673.5926650,  560111.2354450,  540299.0912450,  540811.8938940,  555360.5022110,  546394.6106870,  561362.8853780,  542606.0388560,  547974.7809000,  555096.6039170,  555697.9486420,  564283.2960520,  542112.7084360,  547290.6044290,  547504.6366690,  547596.9809000,  548343.2768350,  563517.2167970,  541900.1818780,  546305.6165160,  559984.0134580,  539884.3826700,  547757.8892740,  555437.1473600,  560631.2745710,  546664.8920110,  561860.6555930,  562131.7275670,  546779.6230050,  550389.9265950,  555777.7163840,  561809.6856620,  538224.8903890,  541250.2777150,  547675.6542030,  560811.5142330,  561729.8274120,  559153.9226320,  542020.7263550,  545968.3381670,  541694.5880010,  563448.2644160,  550255.8755750,  555138.7282680,  560451.0027960,  561238.5501310,  563633.4724740,  555203.9914260,  555267.0241430,  560161.4172640,  561667.3553680,  562358.0604700,  541445.7264250,  552467.3719220,  560706.0417700,  550168.6105300,  546895.2885920,  541058.8742330,  551603.0258800,  552417.6954300,  562096.2055450,  551737.5409000,  562982.9298360,  563017.8655020,  554993.0694910,  541139.3157840,  563931.0913290,  558163.2657180,  563202.4049000,  539614.4071630,  557799.7468570,  554732.9971160,  540456.8198610,  549762.5652140,  563381.2789690,  562630.9175910,  542745.0056190,  542870.7860810,  551075.9078840,  552348.8823490,  553328.1548840,  558148.7586780,  544583.9539540,  553042.5480230,  554627.1949130,  559496.1923290,  561775.5420940,  563589.6825390,  558836.1711440,  541299.6327520,  546055.4154180,  545934.6019530,  547402.8673200,  550300.3163330,  564728.6200610,  539777.9627180,  559540.9607020,  548385.0070680,  553206.5879180,  548313.6388230,  548515.7301060,  558526.1842670,  557979.0344890,  552203.1632830,  560386.4920980,  557926.2387310,  562270.6099400,  547115.7531010,  559347.7302670,  538747.6327520,  557587.3695210,  554483.7302670,  562581.2094710,  546183.9815270,  549659.3364560,  549705.5369980,  552430.0934000,  552440.7142330,  563363.2239380,  563476.0218640,  539803.0830810,  564780.2006900,  555157.4676470,  551333.9627180,  553036.4410940,  556260.9982910,  558089.5039770,  551915.4475670,  559930.0926870,  538179.9615450,  538510.3072160,  552099.7916670,  540165.5176330,  550014.7692270,  564434.4033680,  540209.1572440,  543795.2246420,  561191.5718090,  563392.8118280,  546244.3543770,  545138.3483420,  549453.6720630,  562365.1751860,  550878.5809000,  554804.8843480,  562598.1693890,  563758.3597670,  553190.1087690,  551009.5200300,  557737.9342440,  539899.4184000,  546494.6409510,  552327.3002130,  553387.3193620,  561441.1636160,  563575.9702490,  563690.0134580,  560971.3706440,  564400.1364560,  538342.0748480,  550511.1655150,  559880.9381330,  560458.9589820,  564640.2857540,  562127.6209000,  563736.2019530,  546812.6097290,  552157.2970290,  561315.4951860,  553468.4339610,  562241.5586780,  549905.9958180,  544160.2209980,  555389.4849110,  549169.2524720,  560329.4250720,  563672.6636590,  558757.1467540,  551662.5655890,  563156.3326240,  547239.3874570,  552634.8318550,  558505.8019530,  558601.4316940,  547514.1995050,  564589.3319200,  558202.5501310,  552692.4155860,  553191.6441480,  555091.5861430,  558964.5670890,  561981.1950410,  539384.4545840,  539618.9969800,  542121.8761380,  545546.6813740,  547358.5309000,  552418.8018790,  561405.8136870,  563517.5873520,  538666.7355440,  542023.9849820,  545782.0417700,  547713.5106300,  552863.6854830,  561840.9151840,  545872.5081730,  560004.1265790,  560921.2653190,  563333.5106300,  561651.9994410,  542961.7780140,  541526.6150710,  548866.1590030,  539962.8600370,  557787.6313670,  539837.4687610,  549479.2053600,  560351.1740030,  563739.4380430,  539793.4330740,  540732.7259830,  549891.2809000,  553472.4475670,  558364.6891710,  546305.1277010,  550109.9258280,  553405.3250860,  558005.6924040,  558835.5279590,  561074.3242530,  550499.6666140,  563148.4268630,  547429.4583190,  558752.7300530,  564523.4732080,  559244.5366600,  559286.2893750,  561376.9421900,  560182.2986660,  561385.7809000,  554077.7416840,  559844.2501740,  544060.7486420,  554859.2094710,  547198.5351580,  553009.2105580,  558028.0929570,  561463.5731080,  564058.1547320,  538990.1748370,  544530.7711910,  558193.1627180,  542143.5289310,  549397.0388510,  541732.7275090,  556153.6651110,  559547.0629510,  564155.5667510,  542251.2354450,  559993.1012880,  542502.8613600,  558151.1559000,  558832.8300800,  561151.0189950,  562700.5345230,  542710.3920110,  553804.7988530,  558712.0161940,  562137.3962850,  541411.8523290,  550674.0263310,  554220.8971790,  562234.1415560,  541071.6742330,  558407.5703740,  558508.6965630,  540029.1142330,  542998.1714330,  559159.0609000,  559613.8454160,  546807.5097140,  562295.4692120,  547291.9959540,  558219.4530310,  560469.6475670,  546874.3072160,  564590.6669760,  550004.6342330,  549666.7417830,  561640.4929420,  542246.5645990,  548020.0999180,  543327.7156780,  547560.1849400,  547731.8976050,  551841.5083340,  546452.5460780,  554943.6523860,  561527.7809000,  551104.0807500,  545596.1135230,  542764.6559000,  540686.6056680,  552146.8458350,  562072.7914260,  544456.1244680,  547276.6513660,  561656.1501310,  554014.5065640,  558481.2140550,  542671.3755590,  551926.5758790,  559131.8625330,  559714.5501310,  562913.1461690,  563114.2156830,  563639.1189880,  539330.3809000,  540036.2957510,  544860.3474240,  563026.2112800,  540460.2752820,  557820.7645070,  559755.2783870,  561962.6620190,  553280.7300530,  562672.1020680,  562511.7056270,  541136.0233240,  549459.7396630,  556114.4475670,  558497.2456890,  559310.5309000,  547545.7966480,  541388.1992010,  549538.1959940,  541122.5271690,  549058.0467060,  560163.6484500,  546694.1577120,  553312.5081730,  564439.0241430,  553053.8781970,  553309.4509140,  558553.0309000,  539867.0057060,  540247.7914330,  549101.3225670,  558829.6256490,  552110.3256320,  555933.8609000,  562336.8673200,  543709.0295190,  549795.8985470,  555961.0031220,  546577.0825450,  548815.5015980,  556986.0127230,  560270.5376570,  560799.4771030,  563029.2758490,  541350.5309000,  557770.0694910,  559364.4988490,  559827.1226720,  560642.4255280,  540478.0417700,  549655.8916270,  554487.8809000,  560976.6654530,  561957.7184000,  540537.9627180,  551779.4521330,  553372.2937210,  559606.3523290,  560347.9089000,  551512.0520860,  561127.4105300,  562959.9326070,  558272.9466560,  539769.1937440,  552354.3714940,  559159.6209000,  543989.8367660,  544225.2858500,  550989.8776740,  553145.8263550,  561973.7009000,  558799.3598470,  561227.2554760,  562799.8968420,  545602.7663230,  558963.1263550,  559369.6475670,  560467.4111520,  551316.9202940,  547699.9401920,  548653.9021820,  548572.4031220,  562344.1198830,  548045.8927010,  551523.7594330,  551149.5088760,  555690.5733530,  561790.0309000,  541855.7142330,  549654.5618520,  556212.1142330,  561376.8214410,  562178.0435260,  539502.6692530,  544023.0492660,  540476.7039770,  557069.7726890,  564399.8961160,  546988.1367890,  540623.3229390,  560093.4303850,  543648.6491170,  551140.1083850,  540091.4753440,  549982.2764220,  542397.1338410,  553413.4806890,  544344.8606550,  558704.3356450,  557401.2710960,  561383.8778700,  549850.6358620,  556547.1055750,  559196.9152280,  548270.3763200,  552548.1097490,  552883.5456060,  543822.6227710,  547189.9523290,  563363.9313700,  558950.4933010,  560440.8517660,  557632.5809000,  544013.1675670,  540097.5990820,  546368.2253440,  548265.1675670,  548417.1142330,  557440.7052700,  558517.9033490,  540736.7661220,  553282.3409000,  558487.6176350,  543277.9097980,  544489.0262610,  549203.5886800,  541918.3033470,  550917.3762760,  552263.4237570,  551274.0966890,  557113.1445360,  548998.8596880,  553130.6380430,  557351.9602560,  547885.9944920,  540990.4475670,  559260.2937210,  561729.2758490,  540155.1142330,  544523.2773370,  545908.1679970,  547841.3962850,  548260.8475670,  557512.4295490,  544256.4475670,  548750.5024310,  551109.8932600,  544009.9627180,  553043.2573400,  557698.1531400,  558414.2253440,  556212.8872830,  558860.7039770,  544572.6622560,  562848.5501310,  544434.0373100,  551378.8231540,  542307.3999480,  556377.1664530,  557156.1988100,  543020.6991390,  551243.8100970,  561704.5809000,  553803.2660490,  557420.1679970,  559834.8634690,  544958.8016920,  552348.1192690,  553726.5513920,  540422.1106870,  543712.3282680,  544854.2863950,  545765.2068630,  553105.0482270,  559924.1519740,  563031.5438630,  545513.6613120,  552925.5971730,  559659.6666140,  560793.0309000,  561211.2771960,  552813.6756370,  541937.6094710,  551433.0899910,  554677.2715170,  540603.1241840,  540724.7995340,  546143.5884260,  547775.3237570,  541874.5850240,  561280.0233240,  562434.5009000,  543763.4992100,  558641.8014340,  558978.5395210,  559489.8677020,  561506.1610000,  562053.5027540,  545245.2052900,  557652.5155940,  560921.5106300,  561327.6106870,  561643.6209000,  559714.0209000,  556957.3136100,  564166.5625090,  550474.8177010,  545245.7080110,  552725.1798180,  553804.0437710,  559928.7181380,  542523.5974140,  546223.5339860,  556832.1074310,  558232.7335010,  561849.3201410,  541993.4969120,  559327.3395210,  563221.9874770,  541904.2937210,  554534.5417200,  543822.3649710,  546652.0839300,  551497.3397240,  553232.0267630,  558264.1338410,  559076.9607560,  559800.4705550,  560313.7132670,  561033.8234530,  561410.1193620,  561980.7538730,  564444.6697890,  546202.9028510,  548074.0998320,  561482.1559000,  562806.3962850,  543320.5081730,  564248.1424820,  560100.3724490,  560190.4179370,  553562.9724640,  541043.9441290,  547839.5740030,  546166.9069500,  556366.1941230,  541401.4669000,  551294.9645730,  562288.1679970,  547946.4275170,  556750.6584160,  559855.3103120,  557983.4521330,  543064.7324420,  559124.0966890,  560431.5142330,  544212.3364560,  546434.4655360,  551610.5917110,  542230.7486420,  553613.0440580,  556391.2291760,  559886.2875670,  561659.1493210,  563561.5473000,  542584.6008290,  542924.1252710,  548290.0797510,  554669.9484980,  546371.6957940,  559554.3745070,  544326.5263550,  554565.2094710,  549225.9627180,  553523.6209000,  555833.0906350,  560728.8005080,  545864.5920680,  551937.0646740,  541879.7097890,  542867.0122100,  551415.8077460,  544631.6690120,  564306.5086940,  553957.0100670,  541134.7142330,  542088.0431950,  552611.0905450,  553045.2408020,  553616.8300800,  541219.2525980,  541243.9227440,  544137.2845500,  545649.1926650,  550597.6161940,  554404.1342570,  548047.6682240,  554184.7142330,  556027.3845820,  557509.5042200,  559749.6813520,  544331.5505340,  547553.6221700,  552730.5395210,  557702.1990520,  551655.8987640,  552021.5740030,  553833.5809000,  559792.9679970,  551863.0047810,  554236.5483940,  556013.5513920,  556910.8712010,  562632.6821000,  546094.9680660,  551784.1842610,  552460.0031220,  557501.4342330,  559602.3523290,  560854.3856330,  561210.2460160,  553719.4686520,  548418.0407260,  550456.0143460,  548215.1414680,  562886.2855730,  541408.7174850,  543337.3809000,  553609.2266830,  561946.3340910,  564418.9399910,  547747.2446680,  559173.1885660,  559499.4010120,  559884.2937210,  551513.3809000,  544494.7846740,  552768.9237570,  553204.3766450,  561324.3182130,  562707.1914260,  553160.0718090,  548118.1897400,  551879.8601080,  559985.2142330,  549171.2061870,  551670.4287870,  552893.7742110,  560730.9955120,  552537.4951860,  557531.1771260,  561786.1537810,  548466.6609000,  559552.7990820,  541579.7809000,  544142.1809000,  560685.3682020,  541743.6794070,  551200.6084860,  553378.7913530,  560514.1512700,  555649.1080600,  542622.4549330,  544857.7692720,  554142.4800150,  552949.2189660,  561519.2475670,  559435.6007200,  562137.7376630,  551536.5428050,  555497.7501310,  558784.8513230,  559652.0955070,  559160.1876800,  543889.1941490,  545557.1142330,  546754.3053440,  559594.5917110,  561320.8794070,  559534.5364560,  553239.0025220,  562346.0117760,  560456.3569000,  556322.0893990,  560272.6310740,  541997.1633880,  560581.6756370,  563596.3794710,  563948.5449990,  543742.2684390,  556422.3615450,  560024.7057550,  554533.4912920,  544842.0718090,  545076.8441910,  553958.4743670,  559407.3455260,  542539.2560130,  547480.4224840,  552666.6790130,  554394.7256850,  560410.0920110,  553711.2951860,  542004.3622450,  544582.2554760,  553078.4765520,  555970.6044290,  556110.8613600,  542307.6108450,  552765.1904240,  553474.8209000,  558190.6727920,  557271.5762960,  553041.7068260,  560190.2325130,  560286.7650270,  554138.4914880,  552214.4657320,  559824.3569000,  559886.8920110,  562230.5894110,  561941.3699410,  561999.6209000,  551412.0789940,  555848.0420710,  560408.7184000,  546429.3742290,  559045.5122430,  553436.2253440,  552958.9809000,  548172.1629220,  559964.0771960,  562565.2561850,  559595.4651110,  542801.3950380,  547235.5740030,  552575.5238720,  554293.3193620,  558934.7438630,  542205.3340910,  542400.1466140,  559095.9914260,  560494.2057700,  563670.9581670,  544841.9841400,  545231.7503190,  551826.6745170,  557718.8876480,  558094.7438630,  557361.0222790,  555534.8397240,  559339.2791080,  547014.4905770,  551673.7096210,  554526.8889140,  546158.6092160,  554645.3598470,  552814.4120790,  558242.7847910,  559463.3092840,  554163.9171730,  553141.2858500,  561048.2337300,  553043.1029340,  557918.6380430,  544289.2441480,  542285.1142330,  550904.5250860,  553420.8956540,  560079.0654530,  557987.3341470,  563077.1142330,  550575.4951860,  557456.9113350,  559724.8481450,  553857.7473800,  558352.0747780,  559895.6809000,  560489.0440580,  559186.0373100,  563194.9083700,  551619.0835050,  542647.9304330,  553250.9197100,  558025.6169660,  544406.5746610,  550921.8766420,  561030.8985470,  545162.6044290,  551595.0047810,  554865.1393910,  542596.0560320,  543956.8832620,  561987.8057450,  547849.0031220,  554594.1489000,  557889.8321820,  561072.9315850,  543722.7732660,  546657.0282120,  549970.2839670,  559632.9930210,  546029.7360570,  556966.6057590,  552892.4502880,  562269.3743140,  554034.4182630,  563133.7698500,  545076.3378620,  551255.2465030,  552799.8567290,  559752.0666140,  562092.5528300,  545552.4953120,  547194.7279570,  561648.0389650,  547194.9475670,  553435.1528010,  553570.8920110,  560876.0086370,  555164.1075790,  542679.8381790,  551068.4666140,  551464.6415360,  558001.0852480,  563865.4788990,  543006.5829300,  546553.0888850,  546831.4932290,  542863.3949350,  546296.0585860,  558938.8463210,  563821.0361300,  552869.9597620,  560411.4565760,  560619.1288620,  553126.1301060,  553593.9734930,  553782.5378720,  555343.7809000,  564048.2172640,  560791.0098160,  549721.5216410,  560931.0401590,  560549.9347460,  550049.4368920,  564213.7048890,  550249.2382640,  548134.5055380,  560191.9448020,  548087.6176350,  555801.6632530,  559705.9571450,  545253.8434000,  552540.4113910,  553650.6774520,  553367.5409000,  546536.7731480,  553227.0623370,  561593.3566580,  563556.5556040,  543361.4419510,  560862.2951860,  550517.0309000,  543904.2044290,  559159.4139280,  561002.1338410,  563642.2112800,  553752.1142330,  564100.9387950,  551342.7932460,  551947.8387830,  544749.0995150,  548769.7454660,  548587.1050000,  554065.9943090,  554738.8336610,  556207.3821080,  557368.4179220,  546937.9093400,  547815.2534270,  551051.8100970,  551679.3263550,  544128.2009000,  554910.2455460,  563953.5504850,  552322.0859850,  553173.7809000,  559974.5254260,  560269.8718090,  562746.7022680,  544481.7585950,  549143.1708030,  549653.1142330,  559568.6105300,  560558.9347460,  553388.5809000,  553728.3931450,  561501.8568490,  562112.0254410,  562540.6576120,  553011.5510150,  552312.6344030,  563715.2227600,  545368.6119500,  549683.9499140,  550813.5428050,  550412.0013720,  548136.4509850,  554664.2725200,  555982.5430250,  561577.4394370,  551725.9421200,  551931.7505970,  544407.6687500,  554427.2555420,  562272.2432470,  553419.2354450,  549030.2000620,  557558.7519870,  562670.1092580,  546072.7809000,  558491.1409000,  544638.7045360,  552639.7150560,  553539.8415060,  559808.8106030,  555422.0759820,  555645.5072160,  545736.7686840,  546813.1316340,  549402.0103370,  550735.0287630,  552211.8328480,  558610.8707400,  553075.4565760,  562530.0373100,  553692.1445360,  559043.0750180,  550899.7424380,  561621.2831620,  544903.8772860,  546194.9127830,  543558.3532660,  552668.3836400,  559920.6963230,  552059.5255810,  555628.8731790,  560867.7529280,  550986.8219090,  560964.8843480,  544687.9529430,  553463.9441650,  562592.6998190,  546714.4083070,  558085.9675670,  558554.1142330,  554692.6110890,  543975.7809000,  561353.7809000,  552606.8153830,  557094.1565350,  561033.1142330,  561403.9511130,  563232.6940960,  545925.5530520,  554615.0272770,  552431.1359600,  558045.5174850,  563150.4124790,  555815.9316250,  547096.2752360,  549321.5079200,  552082.8324460,  554833.4643260,  555533.7259420,  552177.9409000,  558883.6351510,  563765.3809000,  564094.4766220,  549376.3869610,  555909.7510490,  556237.4812060,  561465.2449520,  561720.0446360,  552622.0666140,  560720.2029400,  544189.5990820,  545500.8475670,  559814.4475670,  563853.7172060,  552793.3193620,  544808.8280200,  562090.8475670,  549796.3093970,  544603.2403590,  545055.8542940,  559764.4648380,  545017.4765520,  553492.2218450,  560740.5132940,  559428.0651340,  559656.5338410,  544247.4042520,  544550.5126070,  561413.3047100,  562304.0380910,  560499.9571450,  560881.0985470,  559850.2682950,  547642.5043040,  558984.8555270,  554435.3134540,  558771.7172530,  555122.9242850,  558058.4877970,  562333.0666140,  552369.5445360,  563120.1995050,  552143.5506840,  558953.6939430,  560789.6570060,  547446.0437290,  555895.8145130,  561325.3193620,  553289.1142330,  561937.4424380,  559908.2609000,  560691.8951860,  552306.9387950,  544462.9684000,  552732.6589490,  559752.7528630,  546471.5102360,  557784.7258840,  564004.3022270,  560068.7839960,  560434.0545840,  552415.2545840,  545151.7809000,  560094.5259980,  544749.7809000,  551760.3657560,  552001.7494860,  558716.1052240,  560184.5081730,  545113.7997320,  561715.6270540,  553047.2488970,  559276.1660850,  560659.5018300,  561839.4458210,  560581.4852480,  545417.9768100,  548012.7735470,  559351.0778120,  560945.2596880,  564006.4836030,  561954.2673860,  559982.4959260,  557520.1809000,  563310.9926990,  547388.0632530,  547768.9660850,  553285.5541720,  559472.4794920,  559906.4475670,  552847.4928480,  561681.4858180,  562758.5964730,  563765.7313130,  553032.8335320,  558852.8202700,  560464.0094710,  548087.7809000,  548596.0377450,  554748.8960520,  560862.5754210,  556031.3321020,  563913.1327520,  561630.3575870,  558315.8186490,  557318.7910990,  560795.8333020,  545120.9334420,  552301.5948530,  559326.1809000,  559539.7128150,  561142.7438630,  545793.1792440,  561226.5126070,  546141.3319200,  552000.1189280,  558654.2809000,  552225.0885920,  557275.2702620,  549637.6392430,  551274.0645230,  550692.8179370,  544973.3726530,  548665.1655150,  548075.0330440,  561715.0309000,  558104.7776210,  546312.4015900,  559124.3707530,  561072.5395210,  561820.7220760,  562526.3397240,  560316.6875670,  563894.8335320,  557681.3047100,  560798.8483850,  560807.7279200,  561562.8634690,  561603.7268460,  548583.1934870,  559400.4897610,  549543.2771410,  545440.9461470,  558754.0260150,  559923.5786530,  551317.9713760,  551451.6697890,  558641.3809000,  560225.4160880,  562034.2530380,  546571.5373280,  551187.5999950,  552570.4475670,  552691.6559000,  561075.2094710,  553440.0789710,  545839.8063780,  561024.6293850,  561717.3193620,  547771.2147960,  547173.6843480,  563961.9548130,  559201.3962850,  552506.1171830,  551729.6960250,  561180.8443920,  558005.2702620,  548635.2718090,  552401.0031220,  559364.6230050,  548750.6865600,  559814.4424970,  562771.7238120,  560911.5050380,  549171.1118170,  553036.4836030,  546105.4394370,  559614.6537520,  554106.8104860,  558298.1827480,  560471.7578230,  557804.5140190,  558897.2004930,  560738.6915750,  561464.7309470,  546227.9744480,  546105.9369280,  547618.3523290,  554473.9726810,  558111.1039770,  563231.1748390,  547365.6411940,  551866.5198830,  556616.6293850,  548526.3297370,  555322.9507110,  560924.4185810,  551219.3727370,  546314.7759740,  561546.3743070,  561849.2863700,  556314.7312550,  560042.6283580,  562073.3208060,  546851.7557100,  554871.5999050,  555375.8194520,  559071.3075270,  559951.4809000,  563125.0718380,  557751.1969580,  554213.6296390,  553095.6581140,  561671.5740030,  548367.8712390,  552057.7287260,  552281.8642330,  548981.3415060,  558642.5846380,  560435.0875670,  550717.4269690,  551851.8016250,  561530.1071410,  559764.0950360,  560912.0567620,  561927.8140950,  548386.9028510,  552816.8179370,  561431.1748390,  550093.7296180,  553166.2545840,  548817.6565660,  547856.4108210,  557441.9323940,  552258.5221590,  560039.1048440,  549615.1862860,  557904.6697890,  547750.6795620,  558658.3724490,  551690.1846560,  557987.5341090,  562705.4291410,  560194.3883600,  563210.0666140,  547039.2718090,  549940.9982910,  559143.1702130,  559471.2205140,  559295.0720390,  560650.9740330,  548712.6101680,  551883.6031220,  549229.9480160,  548285.0380430,  552759.2231580,  547455.0813930,  547707.0798690,  551326.1553800,  547827.4300230,  550122.2673860,  559556.4734060,  551475.3501310,  557512.7313950,  562668.1445360,  562818.4475670,  549876.5101820,  559747.4627180,  559891.3744830,  558520.4555990,  563201.9188310,  551602.6314750,  559944.9565270,  562453.9085600,  550069.3193620,  560582.6935210,  549111.7981410,  558906.5753700,  560097.3809000,  563365.1142330,  552427.5143540,  559467.8523290,  561952.6583190,  551687.6742330,  555295.5478900,  551963.2545840,  560065.5740030,  556768.6581500,  558420.8718090,  560600.3523290,  562934.6732080,  561104.3573280,  561191.2385270,  557009.5659560,  562762.2673860,  559074.2983830,  561731.2376900,  552724.9599630,  554589.1142330,  563086.4191980,  547555.0580080,  558770.9809000,  551750.9783110,  558015.5899190,  546993.5402360,  548941.4279590,  550378.3615450,  555226.1995050,  560696.2358760,  553878.0666140,  559117.4237570,  561323.3009000,  561841.0832260,  559571.3364560,  549975.7809000,  559657.8958430,  562733.9007160,  562958.2011530,  560546.9945750,  562272.7039770,  562668.2399160,  551664.3722040,  558971.2291760,  547333.0679490,  557969.4725300,  560292.8458900,  550262.4641640,  557450.0099080,  552693.6809000,  557188.2628280,  563271.5294270,  563090.2888370,  556880.1649000,  558480.8878180,  559258.1512700,  558933.5483420,  559814.4811290,  549847.3090500,  562999.7809000,  551990.9139050,  547764.5428050,  551825.9123880,  556397.4279590,  558370.1034810,  549619.8392470,  563894.2499030,  548477.8871800,  557492.6560110,  560586.1638790,  550931.1955340,  561746.5431150,  560080.0530890,  547648.2253440,  561843.2094710,  563211.0241430,  550684.2388400,  551763.5586780,  559581.7416840,  560533.0031220,  547557.7809000,  547595.7605950,  547794.1364560,  563417.2896720,  549098.3802690,  552379.3979210,  559592.6852480,  561948.4015900,  551060.3101740,  560267.1722040,  552352.3616620,  560814.9758690,  558362.8488610,  552661.9290480,  562882.5953580,  552635.4172640,  562516.9728910,  551025.4135530,  557506.6975670,  558836.3962850,  560789.2908340,  562980.8383710,  561979.9409000,  549308.6142330,  563505.3809000,  554115.7809000,  559671.2011900,  559910.7523290,  549822.5809000,  552475.3364560,  550551.7809000,  552076.7934310,  560352.9757050,  561031.3019360,  556486.7117760,  561678.9265310,  550103.2647710,  549570.3066300,  558951.9131310,  552080.8257980,  560181.6495130,  550837.9924380,  557471.8542940,  558817.7809000,  553532.8335320,  554269.4154510,  559863.8123960,  550468.3595160,  552812.4951860,  562621.8654070,  561825.2705550,  562247.5690330,  557383.1883070,  549286.1629220,  551411.1305400,  550879.6069870,  559434.8611140,  549384.3734930,  560563.0800910,  559342.5376570,  559418.3355220,  552114.0134580,  558237.9677000,  560476.3092020,  557813.8523290,  561660.8843480,  560752.9403200,  553780.0304780,  548122.5395210,  550178.0527050,  559635.4809000,  553422.0988490,  554422.4133790,  558222.9450790,  559922.7809000,  563591.1048440,  557630.5927810,  559586.2570900,  561778.7026390,  561980.4475670,  550710.6089250,  551667.6401960,  562743.7809000,  563010.5309000,  559848.9403200,  557178.6899910,  559641.9936660,  549947.4192270,  551995.8536270,  556701.2968820,  549548.9772750,  554552.8582770,  548324.0263900,  557572.2891870,  549712.8438370,  550849.4172640,  550504.9860950,  550539.2845500,  560012.8602650,  561377.9793730,  559482.8628670,  561615.1955340,  549310.7087350,  550986.5309000,  551061.5729000,  551204.2717620,  557900.6311770,  549841.9869610,  550943.9059000,  559359.8068740,  559088.0337910,  559720.2628280,  549176.3817230,  554204.8843480,  561807.0666140,  560804.5809000,  561547.9016820,  561906.9603870,  563247.3246260,  559217.2487900,  561785.1467540,  551093.0396410,  552097.9686550,  560179.5206080,  563564.7712940,  556330.0363520,  558554.2900420,  563623.2947120,  561879.4279590,  552812.6965630,  557735.4216600,  551207.3553680,  556615.8671150,  551431.3130640,  548879.2713460,  550869.7946930,  560246.9497310,  551919.8602200,  558365.1142330,  561634.9809000,  563730.8218360,  560186.4475670,  559308.2064320,  554019.9290480,  559820.9088230,  551262.4475670,  552385.6697890,  556707.2277090,  549080.6987080,  549589.3193620,  557304.0876850,  556194.6253440,  554702.6122820,  557510.7106050,  554203.2388760,  550573.0602050,  552573.8061450,  557855.9523290,  549238.4475670,  550148.8152730,  551651.9586780,  559782.8920110,  561797.9780830,  562473.1142330,  563235.0067060,  556778.6302150,  557770.5501310,  558185.2108520,  560415.1935580,  560691.8459410,  555198.8533640,  560969.4614030,  561863.8697890,  550338.2951860,  553889.5369980,  558895.4889290,  561998.6899910,  562673.3746090,  550787.5090550,  553939.8275600,  557991.3671070,  558028.6720920,  556348.6169130,  554089.6532400,  561596.5506160,  552399.4459250,  549681.9116970,  560510.5585400,  551334.6218890,  559779.2094710,  561705.8274120,  548956.9283440,  557864.6014130,  560756.4867820,  552043.2148620,  552115.2877490,  560255.0189950,  561919.9059000,  559303.2702620,  561506.5237570,  560671.7809000,  554766.1659930,  561571.0666140,  562521.3849870,  559183.4320630,  552622.7118500,  556212.3797020,  550675.8333930,  559557.5348270,  560457.7039770,  556651.1784900,  559232.2365960,  552193.3018130,  560336.9627180,  559909.6939430,  560074.8769760,  560614.6752090,  551765.7272600,  562100.9684000,  557283.6327520,  562892.3627180,  549466.0141160,  558994.7374220,  551252.4789390,  550980.7809000,  553700.8143150,  558663.2379860,  557963.2901020,  552673.2901350,  560845.0350250,  561387.9290480,  562470.4951860,  563423.7566940,  551439.1838850,  552303.2094710,  551046.0920110,  561632.5809000,  557173.9962850,  561343.2494310,  562804.8561690,  557526.0839300,  558783.4501910,  560978.0573230,  563025.4257600,  557192.8161940,  558137.4412770,  560464.6270540,  561748.5232820,  550511.1907360,  559968.8190680,  553654.9719110,  550547.4063470,  559562.6840380,  563068.3634240,  551824.1040330,  553439.7809000,  561230.8170450,  561270.0517470,  555086.5229730,  554671.3009000,  557060.4228750,  561554.2859510,  563273.0912450,  563584.2970290,  558881.3319200,  562724.0714030,  561657.1523290,  552028.7300530,  558180.5330370,  562038.2012820,  556367.0261830,  560982.1257280,  552386.6142330,  558506.4182630,  559506.9023470,  554031.3125290,  557775.2840850,  560668.3162000,  554277.6240370,  553538.8867820,  561489.4536270,  562907.8361270,  560200.9857190,  559932.1890630,  561417.1142330,  561793.1142330,  551683.1781600,  554427.1168070,  555969.7431640,  551265.8209000,  560396.1660850,  559321.4724420,  554238.1975670,  550984.5309000,  553222.2630150,  562411.4352210,  550095.3029710,  554569.0449480,  552767.5478900,  561227.9046110,  552535.7360820,  557176.8367380,  560670.4351060,  561150.3691350,  550838.8179370,  558712.7505970,  560032.2678570,  558007.7227180,  559127.1118090,  556301.3438140,  559679.7809000,  560201.0358020,  554204.3822070,  558801.3461170,  560809.7610980,  551009.3398740,  558984.1943080,  563527.9618370,  559524.5004770,  561317.9620180,  551520.5529350,  554957.7163840,  560363.3887430,  550941.2467390,  559314.1959940,  562395.2094710,  560275.1445360,  552595.4899910,  551773.2666140,  550682.4936160,  551588.6609000,  560882.6794510,  557155.2094710,  558690.4718090,  553994.8625330,  562394.5247130,  556926.8546200,  554632.6082500,  556442.1900830,  560205.5309000,  562129.8498660,  552993.4105300,  554123.8951860,  559723.9668230,  554043.2986300,  561598.3152510,  551145.4135530,  559505.1142330,  557119.6682240,  554231.7809000,  560328.1711440,  551189.6612420,  558971.9548130,  562079.2591610,  553235.4140880,  561205.6559000,  554413.6697890,  563249.1992670,  559468.1569680,  553775.5897920,  557684.8475670,  559653.0712230,  560794.7282680,  554899.9157310,  562213.2351560,  561435.4992100,  560857.2579380,  561461.5369980,  555056.9938570,  555339.8747340,  558352.5490660,  557084.5081730,  559412.6293850,  559949.8609000,  558375.3323020,  560472.9771620,  557386.3834230,  559946.8302270,  554229.6904480,  556122.5843190,  561037.7491540,  551572.1946930,  556890.7938870,  551347.1447030,  560954.8397240,  551581.4807420,  557905.5409000,  561049.0374450,  558228.9884470,  560372.4417700,  554121.5360020,  554671.0210060,  561720.4295490,  553416.9705490,  556657.0261830,  561244.1907940,  561372.6454530,  554940.8718090,  555434.9743160,  557760.8712930,  557209.5973250,  553752.7809000,  561905.7512440,  555600.4765520,  559224.6697890,  561610.0054990,  560496.5944590,  558658.7659750,  562143.2769630,  556576.2647010,  556032.9635090,  558348.4228750,  556492.3313590,  554053.5773720,  560622.1662210,  560562.5166930,  555943.4329740,  560311.2718090,  559426.7707990,  562989.1357390,  556964.4059000,  559376.7743640,  562416.5948320,  558455.1607450,  559058.6937920,  555282.9700890,  556871.1737100,  555224.0161940,  555205.0156380,  556586.4475670,  560200.2844970,  561181.5409000,  557687.7398740,  560362.3340910,  555754.0666140,  563084.2077770,  559788.4966890,  553108.3523290,  557550.1213860,  560809.2835090,  555466.7047580,  556902.3434000,  558539.6674250,  560318.2727030,  560635.6833390,  558056.5613880,  562158.5957150,  561446.3509480,  553529.2354450,  555379.6856620,  559254.5649000,  561018.0092740,  552386.9969210,  557935.2989720,  555627.7809000,  560152.5376570,  559601.8920110,  557193.9038770,  555502.8079270,  556818.5177420,  553628.9690190,  558050.0495570,  562717.0032110,  563328.3869610,  559388.2909670,  553411.4506250,  559907.0067060,  555741.6303620,  555884.7239890,  556479.1869320,  553166.2907040,  553831.5490160,  557894.8666140,  559140.3054900,  558074.8883380,  556785.9134300,  560262.4327850,  555317.6710100,  561242.7282680,  553376.2380430,  554149.4676470,  556164.4006180,  559372.8437020,  560602.0783360,  561402.2994190,  556610.9627180,  559238.8849000,  553306.6899910,  557020.6084860,  557458.0481060,  556955.1055750,  562959.8583190,  559888.8065410,  555931.1330130,  559111.1189610,  558183.3544060,  553141.9390400,  555419.2461410,  559631.7911430,  560043.6318690,  555056.8475670,  557439.3753700,  557833.2094710,  563298.2112800,  557542.6809000,  558784.7385980,  561544.5809000,  557311.4790130,  560498.2793980,  563132.7142330,  559504.6697890,  554329.4599120,  560482.0666140,  553227.5569000,  558719.0287630,  556165.0817530,  559218.8031220,  559384.3809000,  553413.3275670,  557257.0330740,  557441.0236180,  555239.1961050,  559551.0347860,  553573.7719310,  557895.2475670,  559875.7809000,  559393.2235230,  561140.0885920,  561538.0251110,  559898.3556130,  555536.1001490,  558672.7878930,  553888.1697400,  556585.3073370,  557984.4055250,  556196.4445770,  556674.7715540,  559616.9103120,  561124.3299200,  556264.7422260,  561416.4705550,  556955.2515680,  557512.5924940,  558599.6390560,  557210.9298360,  562771.8511930,  554760.9395110,  561009.7449720,  558119.4738290,  557870.2164560,  562489.7364560,  556613.1362720,  554335.1634500,  554582.0433430,  554724.7947250,  559922.5248610,  555355.7809000,  562980.6081510,  557411.7809000,  554466.5809000,  553785.8037570,  557712.6649470,  562366.9682590,  556949.5936340,  557340.6445360,  563276.3013990,  554621.5205830,  555238.8772460,  557153.7057120,  560962.6759280,  556519.2385270,  562605.0713820,  554110.6873750,  557662.6646210,  558219.2247260,  562754.7471920,  557187.2930950,  560907.1683400,  560867.6139940,  563197.6148350,  562914.9951860,  558434.7428380,  556762.1537810,  560466.9973950,  561667.8652090,  562404.0637280,  561985.2002550,  562835.3553680,  561187.1396790,  555037.1429070,  555159.3364560,  556279.2047230,  562601.3292870,  560640.1784160,  561054.3523290,  555497.9726810,  558626.9497310,  557108.7560240,  560168.5917110,  560918.7596230,  555335.5912450,  560780.6979730,  562598.3691350,  555314.1287260,  556424.3090800,  555612.8332080,  556205.6475670,  556850.0666140,  555490.2697890,  557041.8274120,  560324.7565100,  555910.0821550,  557435.9395400,  558637.1602100,  559230.6828120,  562662.4094710,  556410.6899910,  563205.4541030,  558131.7146020,  557605.9347460,  554910.5754210,  556688.9516320,  557470.8920110,  558378.5649000,  558544.8885920,  560509.7343880,  556941.8737270,  557825.8452190,  560670.1092580,  557064.2406700,  560777.1962850,  559437.1686550,  554568.4136680,  562659.7131030,  562781.9898550,  559899.9194680,  556407.5757720,  558537.8274120,  554972.2863150,  557503.8951860,  558124.2687050,  562793.2002550,  557190.1074310,  557407.3409000,  555280.7550700,  562552.9930210,  555478.0077040,  559819.2960520,  556031.5209000,  561839.5999050,  556348.8718090,  557208.4475670,  560127.1822610,  557962.1470970,  561294.9573710,  556401.8774520,  557052.4360720,  563049.4699340,  555210.3586780,  562589.2545840,  560119.7809000,  556141.9973500,  556726.2373860,  555808.3546050,  557556.5535160,  561242.4796950,  562104.0707550,  559618.1473920,  560171.9021120,  560308.7942330,  561049.7809000,  562380.0567620,  561977.8963670,  555068.7144600,  560813.1010190,  556296.5916300,  556571.7809000,  555958.9738820,  556276.7910010,  560531.6370150,  561996.7178370,  557761.6564980,  557946.3340910,  562642.1809000,  561437.6960520,  557602.6899910,  562321.2472070,  561317.8349540,  562188.8270540,  560293.9523290,  555548.9423730,  561981.6187380,  558370.8742330,  556430.3484680,  557009.6359720,  559795.4409000,  556039.8538930,  561535.2632530,  562477.8666140,  559445.4279590,  562004.3683130,  559914.1809000,  561299.2809000,  562696.0257980,  562297.6345590,  561263.1669820,  559005.9413280,  558784.6098570,  556543.1142330,  562531.4530310,  561808.9405640,  557089.8126460,  558064.1517610,  558444.5328750,  560296.5285640,  559605.4620590,  562455.7362070,  562712.8985470,  561427.2662800,  559099.3038360,  557606.4864700,  560586.9028510,  560288.2687050,  557877.9127680,  556857.0536270,  558768.7604920,  556716.1072250,  558903.0005450,  558977.6836030,  562015.8236810,  556277.8695320,  560657.8234530,  560793.9430620,  561145.6413650,  562620.1293320,  560977.9127980,  562905.3035370,  556571.9695790,  560131.4565760,  560551.0697890,  562496.9475670,  562317.0053900,  558912.9340530,  557532.5575990,  557730.7809000,  557024.6697890,  560724.5809000,  562406.8285190,  557633.3275670,  557161.8454160,  562371.3558320,  557050.6805760,  562093.7809000,  560368.2424380,  562502.4287870,  560636.3620970,  562402.2156830,  559372.8305450,  558975.9870860,  560006.5177420,  560535.0729350,  557528.5081730,  558738.6084860,  558299.6701310,  562331.4264700,  559250.1287260,  560608.0197060,  560995.2415740,  559135.3458550,  562146.4274260,  557462.0885920,  557321.7002550,  562939.4059000,  560223.5983270,  561489.5380060,  561055.3199950,  562493.9398960,  559324.6360720,  562945.5740030,  562970.5635090,  559667.8342330,  559491.7237570,  561026.6283580,  561192.8179370,  558352.4279590,  559672.0103210,  560508.7386460,  560226.4635350,  557824.2330070,  560985.7244030,  557686.2531390,  559082.4927640,  562207.4226910,  562326.3551570,  559944.0580360,  561406.9134300,  559333.1515290,  559755.7225060,  558187.6985950,  560721.2134350,  560843.8072160,  561390.3895960,  560908.9767760,  559165.4673110,  558212.9359800,  559011.7423150,  559435.3563190,  561544.6989330,  559904.5990820,  560335.4790130,  559266.1726530,  559539.4530310,  560222.3473740,  560372.0382100,  562853.0003460,  558438.1378020,  559582.8420250,  561366.7267480,  558518.2532620,  561593.0969170,  560113.4401590,  559633.5039770,  561401.2066430,  559841.8732080,  558717.3887950,  558971.1937440,  558820.4638270,  559018.1559000,  560658.7543510,  561480.2570900,  559147.7024690,  559371.8146550,  559740.2816360,  560316.9880010,  562106.4342670,  560725.7954990,  561492.1559000,  559319.9713760,  561580.8690230,  562463.8282900,  560240.7682420,  559856.9063750,  560638.6618330,  560488.8756370,  561803.2094710,  562037.0985470,  559659.8217160,  560742.2925280,  559536.3613990,  560007.6964970,  562205.2724250,  562060.4514200,  560235.2856620,  559829.1142330,  561148.2253440,  562505.9581020,  561149.3809000,  560395.8904890,  561558.3440070,  559919.4336330,  560831.4358020,  560825.4172640,  561145.4105300,  560626.8023590,  561176.0309000,  562426.3530780,  561653.5841820,  561138.6409040,  561942.6484600,  562644.9459260,  561610.6168130,  562197.9877970,  561346.6280950,  561931.5234740,  562440.0858330,  562011.7809000,  562255.5705950,  562528.6764220,
[truncated: 218,910 more chars]
