# Supplementary material for: Effects of high spatial and temporal resolution Earth observations on simulated hydrometeorological variables in a cropland (southwestern France)
Source: Copernicus journal article supplement (doi:10.5194/hess-21-5693-2017), 2017-11-16
Supplement: Supplementary file 1 [file hess-21-5693-2017-supplement.zip › README.md]

# General

These files, called "OPTIONS.nam", define the configuration of SURFEX-ISBA for the several offline simulations performed at CESBIO
Further information about the configuration of SURFEX is available here: http://www.umr-cnrm.fr/surfex/

## Etchanchu et al. 2016

[OPTIONS.nam_REF_2006](http://tully.ups-tlse.fr/simon/surfex-configuration-files/blob/master/OPTIONS.nam_REF_2006) is used for the reference experiment called ECOCLIMAP.

[OPTIONS.nam_FMST_2006](http://tully.ups-tlse.fr/simon/surfex-configuration-files/blob/master/OPTIONS.nam_FMST_2006) is used for the second experiment called FORMOSAT.

Because of the changes in land cover, each year has its own calculation grid. Thus, a simulation is done for each year separately. Some output variables (SWI and TG) are then interpolated on the calculation grid of the next year in order to initialize the next simulation.
